# Supplementary material for: Genetic Variation in the Nuclear and Organellar Genomes Modulates Stochastic Variation in the Metabolome, Growth, and Defense
Source: PLoS Genet. 2015 Jan 8;11(1):e1004779. doi: 10.1371/journal.pgen.1004779 (PMC4287608; doi:10.1371/journal.pgen.1004779)
Supplement: S8 Table — P values of Pairwise epistasis tests using ANOVA for all per line CV phenotypes. Results of the pairwise epistasis analysis using per line CV phenotypes and QTLs validated from the single marker ANOVA. Only P values for the model are shown in this table. Metabolites are at the start with defense compounds and growth at the bottom of the table. (XLSX) [file pgen.1004779.s016.xlsx]

## Sheet: Sheet1
Table S8. P values of Pairwise epistasis tests using ANOVA for all per line CV phenotypes.
Results of the pairwise epistasis analysis using per line CV phenotypes and QTLs validated from the single marker ANOVA. Only P values for the model are shown in this table. Metabolites are at the start with defense compounds and growth at the bottom of the table.
	M.I.36	M.II.16	M.III.51	M.III.60	M.IV.3	M.IV.23	M.IV.72	M.V.82	M.V.94	M.V.101	Maternal	M.I.36*M.II.16	M.I.36*M.III.51	M.I.36*M.III.60	M.I.36*M.IV.3	M.I.36*M.IV.23	M.I.36*M.IV.72	M.I.36*M.V.82	M.I.36*M.V.94	M.I.36*M.V.101	M.I.36*Maternal	M.II.16*M.III.51	M.II.16*M.III.60	M.II.16*M.IV.3	M.II.16*M.IV.23	M.II.16*M.IV.72	M.II.16*M.V.82	M.II.16*M.V.94	M.II.16*M.V.101	M.II.16*Maternal	M.III.51*M.III.60	M.III.51*M.IV.3	M.III.51*M.IV.23	M.III.51*M.IV.72	M.III.51*M.V.82	M.III.51*M.V.94	M.III.51*M.V.101	M.III.51*Maternal	M.III.60*M.IV.3	M.III.60*M.IV.23	M.III.60*M.IV.72	M.III.60*M.V.82	M.III.60*M.V.94	M.III.60*M.V.101	M.III.60*Maternal	M.IV.3*M.IV.23	M.IV.3*M.IV.72	M.IV.3*M.V.82	M.IV.3*M.V.94
Metabolites	C1_9981308	C2_1364552	C3_9623868	C3_11020079	C4_262249	C4_2323396	C4_13033934	C5_22259506	C5_25538680	C5_26758064	Maternal	C1_9981308:C2_1364552	C1_9981308:C3_9623868	C1_9981308:C3_11020079	C1_9981308:C4_262249	C1_9981308:C4_2323396	C1_9981308:C4_13033934	C1_9981308:C5_22259506	C1_9981308:C5_25538680	C1_9981308:C5_26758064	C1_9981308:Maternal	C2_1364552:C3_9623868	C2_1364552:C3_11020079	C2_1364552:C4_262249	C2_1364552:C4_2323396	C2_1364552:C4_13033934	C2_1364552:C5_22259506	C2_1364552:C5_25538680	C2_1364552:C5_26758064	C2_1364552:Maternal	C3_9623868:C3_11020079	C3_9623868:C4_262249	C3_9623868:C4_2323396	C3_9623868:C4_13033934	C3_9623868:C5_22259506	C3_9623868:C5_25538680	C3_9623868:C5_26758064	C3_9623868:Maternal	C3_11020079:C4_262249	C3_11020079:C4_2323396	C3_11020079:C4_13033934	C3_11020079:C5_22259506	C3_11020079:C5_25538680	C3_11020079:C5_26758064	C3_11020079:Maternal	C4_262249:C4_2323396	C4_262249:C4_13033934	C4_262249:C5_22259506	C4_262249:C5_25538680
z.biphenyl	0.594541	0.668716	0.43152	0.317264	0.400838	0.737567	0.953969	0.948706	0.360194	0.40047	1.02e-05	0.10792	0.974181	0.623374	0.789627	0.467213	0.765416	0.237855	0.0427259	0.164983	0.411783	0.495563	0.795818	0.538236	0.712488	0.238065	0.713828	0.791627	0.825274	0.785591	0.777479	0.843934	0.604986	0.901552	0.253887	0.503528	0.204129	0.0525485	0.76577	0.88916	0.609772	0.407086	0.295085	0.102088	0.409515	0.723491	0.998152	0.195901	0.302499
xylulose.NIST	0.686055	0.1452	0.821213	0.0975203	0.718028	0.21505	0.151918	0.0388347	0.952882	0.666183	2.26e-08	0.466812	0.978896	0.100787	0.918829	0.34006	0.0689666	0.289411	0.571877	0.276124	0.77317	0.0232848	0.103164	0.647042	0.0105127	0.247493	0.796356	0.510017	0.979004	0.391124	0.694575	0.731912	0.547013	0.614836	0.219823	0.502232	0.23979	0.26534	0.116194	0.802566	0.688955	0.811455	0.251733	0.185351	0.146441	0.0773027	0.814702	0.887963	0.283475
xylose.2	0.835942	0.114781	0.0110855	0.0665903	0.294636	0.214369	0.74823	0.835053	0.491029	0.165979	0.00108788	0.34986	0.958381	0.681063	0.235228	0.953103	0.174822	0.261803	0.737651	0.99614	0.646803	0.666703	0.726428	0.326996	0.755072	0.0490806	0.0250198	0.94708	0.222978	0.365479	0.700841	0.945433	0.597519	0.356683	0.648732	0.201385	0.46402	0.510085	0.313657	0.800921	0.0814166	0.452625	0.234875	0.377885	0.1972	0.0027229	0.00181389	0.553595	0.954845
xylose.1	0.245558	0.953885	0.700567	0.183807	0.915945	0.924521	0.999227	0.878478	0.702162	0.868102	0.641342	0.963066	0.32883	0.211437	0.337018	0.606883	0.590399	0.290072	0.646632	0.435689	0.839151	0.756503	0.651476	0.176136	0.588333	0.661428	0.131452	0.91479	0.582517	0.865499	0.496164	0.689323	0.981881	0.122301	0.319703	0.809546	0.36741	0.717892	0.702821	0.70232	0.145449	0.44896	0.166142	0.0560785	0.474498	0.27828	0.86496	0.867805	0.160591
xylonolactone.NIST	0.127391	0.525298	0.368899	0.738525	0.674482	0.338972	0.773611	0.914655	0.96392	0.976239	0.0210807	0.642736	0.743169	0.79644	0.84811	0.174074	0.315322	0.556466	0.722122	0.701341	0.13433	0.922109	0.584697	0.242312	0.951835	0.160685	0.203316	0.87415	0.600253	0.837631	0.328221	0.00870152	0.0353733	0.523103	0.599304	0.0233147	0.0417324	0.774703	0.223609	0.256228	0.778756	0.615271	0.0625198	0.102457	0.214974	0.464374	0.0895945	0.868202	0.196966
xylonic.acid	0.537104	0.355552	0.824107	0.36709	0.282811	0.0480617	0.138617	0.609022	0.686695	0.671658	6.58e-07	0.576294	0.170641	0.0272895	0.741177	0.707637	0.071791	0.867695	0.374732	0.686373	0.417178	0.0104265	0.0183097	0.494465	0.868846	0.133786	0.533401	0.437951	0.666398	0.200324	0.224255	0.715129	0.0428773	0.368303	0.176826	0.619225	0.353296	0.15006	0.422192	0.200165	0.0792815	0.687215	0.27462	0.270246	0.499158	0.525708	0.052091	0.286116	0.539716
xylitol.563	0.242373	0.222972	0.988091	0.704274	0.00184401	0.107907	0.538373	0.0697314	0.0362599	0.127939	2.59e-18	0.65287	0.117585	0.258597	0.146485	0.689278	0.787074	0.554019	0.663809	0.911992	0.862513	0.209695	0.788441	0.678496	0.856936	0.16299	0.673942	0.761126	0.259973	0.16128	0.863971	0.37348	0.81136	0.664291	0.637175	0.922583	0.912954	0.53867	0.748379	0.977972	0.417341	0.27949	0.442323	0.688563	0.617974	0.80484	0.587146	0.110622	0.279921
xylitol	0.664705	0.827955	0.10649	0.52204	0.531512	0.510806	0.303344	0.849653	0.655529	0.469927	2.28e-11	0.277092	0.305888	0.421495	0.895639	0.943812	0.426769	0.107735	0.0757306	0.837547	0.411382	0.0989995	0.356356	0.778852	0.28242	0.431087	0.322523	0.0756642	0.389814	0.176914	0.659823	0.469762	0.574172	0.479241	0.857478	0.274942	0.298325	0.51912	0.363121	0.061193	0.317339	0.776855	0.146588	0.221015	0.527403	0.134311	0.217664	0.718186	0.0431567
valine.TMS1x.poor.spec.quality	0.688411	0.0643918	0.846648	0.0143215	0.723343	0.800773	0.495015	0.691632	0.542682	0.689034	0.295176	0.676824	0.76359	0.403006	0.371074	0.489866	0.271895	0.306265	0.0992413	0.23567	0.0356758	0.0153082	0.51398	0.510547	0.0924512	0.0851471	0.523775	0.645735	0.420385	0.570122	0.206408	0.123197	0.800065	0.496441	0.277463	0.207124	0.337926	0.153567	0.209353	0.263621	0.538503	0.54518	0.332796	0.554499	0.640092	0.635019	0.0412243	0.829859	0.930917
valine	0.687415	0.543592	0.65968	0.818962	0.920807	0.611656	0.141982	0.0759006	0.857781	0.866867	0.002472	0.969962	0.596814	0.716834	0.211167	0.777866	0.0440254	0.462554	0.0264157	0.248958	0.0282062	0.704461	0.271979	0.396192	0.245028	0.877883	0.576961	0.975486	0.925998	0.344741	0.800075	0.303768	0.721598	0.81647	0.0884029	0.919952	0.342037	0.323753	0.159718	0.315131	0.952412	0.111284	0.876028	0.678605	0.237392	0.439407	0.101769	0.534684	0.787827
uric.acid	0.439431	0.430423	0.00579234	0.13367	0.449109	0.106033	0.0123752	0.0361659	0.558932	0.244521	0.00292322	0.223497	0.213389	0.795725	0.195644	0.795091	0.420227	0.416455	0.0343972	0.0153447	0.972225	0.0211974	0.543084	0.309693	0.122318	0.0841297	0.0396088	0.155589	0.58139	0.595046	0.709717	0.291231	0.913667	0.349674	0.548308	0.59145	0.663666	0.640905	0.997204	0.246374	0.0170524	0.518427	0.672832	0.626905	0.218862	0.185612	0.421619	0.938975	0.159067
urea	0.114787	0.104182	0.0649125	0.596116	0.746316	0.799536	0.90992	0.313115	0.901558	0.368745	5.64e-21	0.193895	0.143589	0.68369	0.479931	0.457107	0.681615	0.468502	0.303993	0.464969	0.0320877	0.969341	0.923577	0.579838	0.994018	0.51095	0.838177	0.493545	0.570399	0.899968	0.899029	0.309903	0.438887	0.797061	0.722365	0.648075	0.927235	0.114601	0.082791	0.861363	0.863893	0.441176	0.397203	0.741142	0.453762	0.0204165	0.167941	0.136393	0.170281
tyrosine	0.488915	0.80111	0.862614	0.469808	0.997437	0.809661	0.0497876	0.664655	0.955495	0.747973	0.00085862	0.665638	0.415033	0.862444	0.473453	0.704009	0.643945	0.484841	0.333699	0.355995	0.151611	0.778456	0.415288	0.427362	0.622257	0.872532	0.257668	0.318283	0.627567	0.895282	0.580264	0.0510308	0.645849	0.366509	0.772389	0.0531204	0.115105	0.757863	0.258424	0.458333	0.203524	0.949331	0.168195	0.221003	0.126593	0.51954	0.746695	0.0747475	0.778317
tryptophan	0.304589	0.625028	0.47462	0.151417	0.239491	0.181402	0.795107	0.676099	0.506653	0.512778	0.619061	0.0584815	0.845788	0.701777	0.814878	0.0199615	0.061966	0.270134	0.962719	0.57205	0.258442	0.222617	0.643949	0.245963	0.295664	0.861095	0.665187	0.412778	0.540053	0.59905	0.325142	0.268474	0.929167	0.179669	0.797293	0.886989	0.906415	0.0415089	0.261984	0.523502	0.0640655	0.893466	0.74103	0.931954	0.398564	0.915222	0.0105218	0.366182	0.381739
triethanolamine	0.637421	0.04834	0.262188	0.444248	0.838358	0.442511	0.525049	0.523807	0.936813	0.646328	0.149178	0.453932	0.917839	0.955758	0.485791	0.863488	0.540984	0.231817	0.930235	0.329079	0.96034	0.886901	0.651071	0.0739854	0.625059	0.823014	0.600845	0.805849	0.95883	0.811616	0.41788	0.826322	0.206934	0.530672	0.511228	0.406042	0.183331	0.879112	0.459429	0.387629	0.656202	0.459236	0.391811	0.131652	0.585132	0.687139	0.718225	0.385388	0.766337
trehalose	0.0250349	0.433708	0.757128	0.664792	0.229053	0.896264	0.0590681	0.187675	0.743032	0.469549	0.0379736	0.56976	0.308008	0.391002	0.167304	0.15437	0.737231	0.638637	0.72533	0.628555	0.018213	0.77309	0.833574	0.625094	0.443221	0.717848	0.553074	0.57694	0.323124	0.984304	0.856729	0.169618	0.0182454	0.394182	0.198155	0.672035	0.854135	0.28317	0.940396	0.891592	0.977057	0.620358	0.631006	0.723784	0.632047	0.177967	0.152207	0.571438	0.528945
trans.sinapinic.acid	0.25418	0.439874	0.0841427	0.152835	0.00841449	0.0247076	0.209729	0.418393	0.410445	0.770166	1.65e-09	0.537435	0.373606	0.198042	0.431403	0.220812	0.389807	0.666879	0.318983	0.501578	0.0420431	0.176966	0.673399	0.882658	0.826846	0.556612	0.180343	0.808504	0.342131	0.922529	0.658769	0.557416	0.258393	0.810897	0.12198	0.801859	0.731069	0.219086	0.0251977	0.274059	0.519845	0.736025	0.391111	0.53594	0.941715	0.7193	0.762805	0.460942	0.021703
trans.4.hydroxyproline	0.965499	0.209488	0.122119	0.190364	0.852266	0.12988	0.244813	0.126707	0.422081	0.695917	1.15e-27	0.52097	0.900453	0.74333	0.680804	0.766718	0.604579	0.784873	0.723376	0.692343	0.202466	0.0668079	0.145688	0.906234	0.0637649	0.688492	0.895614	0.201826	0.930069	0.93556	0.62665	0.583239	0.734424	0.491645	0.883683	0.717538	0.526085	0.0278311	0.487249	0.964764	0.398423	0.574798	0.349318	0.251597	0.211661	0.221655	0.555108	0.134812	0.563558
tocopherol.alpha	0.491568	0.526425	0.395123	0.333668	0.894864	0.067271	0.992863	0.155878	0.961344	0.267656	1.05e-13	0.632281	0.0676728	0.0792888	0.688612	0.747205	0.975516	0.852773	0.428984	0.659002	0.0315905	0.540052	0.442448	0.031038	0.785403	0.942109	0.388022	0.580114	0.591788	0.520116	0.913361	0.0960596	0.0223305	0.329472	0.514725	0.231411	0.318157	0.949363	0.977936	0.721743	0.696993	0.609662	0.245154	0.175785	0.109288	0.982569	0.376378	0.961782	0.182377
threonine.2TMS	0.366053	0.434899	0.335078	0.671437	0.854923	0.602233	0.923487	0.477	0.634312	0.845099	1.72e-06	0.858782	0.950947	0.93339	0.0943323	0.163698	0.101929	0.929955	0.265898	0.13672	0.840557	0.653939	0.437021	0.243377	0.161032	0.778186	0.0856902	0.660323	0.181616	0.133907	0.834548	0.604618	0.231959	0.766804	0.49995	0.777905	0.324687	0.263575	0.911146	0.775103	0.265437	0.649765	0.690088	0.593506	0.423806	0.188	0.610622	0.42099	0.454315
threonine	0.536349	0.203953	0.527707	0.208611	0.243357	0.167163	0.993422	0.959645	0.827956	0.868021	0.000336483	0.410085	0.422646	0.710829	0.34325	0.266037	0.87046	0.200639	0.592475	0.43031	0.46655	0.96636	0.805124	0.303003	0.00930108	0.980598	0.761561	0.606206	0.757992	0.963123	0.0931361	0.870162	0.40362	0.605316	0.0239098	0.249275	0.518543	0.466155	0.370025	0.616891	0.333527	0.279598	0.462034	0.550278	0.97118	0.85151	0.10132	0.533819	0.819326
threonic.acid	0.523691	0.71088	0.480462	0.529498	0.501525	0.834008	0.139589	0.487868	0.900542	0.816685	0.16982	0.699446	0.889116	0.625105	0.432756	0.350343	0.717903	0.444261	0.509272	0.428122	0.855375	0.141976	0.0567496	0.188647	0.367344	0.378123	0.166421	0.911132	0.783059	0.228154	0.88235	0.958464	0.295408	0.160877	0.0101892	0.612517	0.559489	0.404569	0.682845	0.758987	0.606436	0.00896247	0.361156	0.943226	0.50712	0.671991	0.954411	0.309051	0.314767
talose	0.196212	0.859506	0.293624	0.0174843	0.328937	0.417733	0.544101	0.052208	0.116534	0.51792	1.95e-08	0.88544	0.462933	0.661748	0.00691939	0.847006	0.216756	0.41724	0.524105	0.64262	0.845639	0.76652	0.50803	0.685687	0.538406	0.892045	0.114119	0.62618	0.937479	0.619834	0.345214	0.941846	0.69083	0.532236	0.458037	0.891301	0.919164	0.61566	0.548893	0.456979	0.335645	0.996248	0.50948	0.688744	0.919959	0.3944	0.907461	0.660598	0.339387
sucrose	0.3638	0.0646983	0.635392	0.617742	0.920607	0.467205	0.475866	0.030428	0.0435456	0.178116	2.51e-05	0.257896	0.600556	0.264252	0.997962	0.163073	0.254826	0.125777	0.151755	0.147482	0.617141	0.157574	0.28235	0.617366	0.281698	0.287092	0.489718	0.254691	0.636154	0.00186662	0.326161	0.748009	0.0984301	0.471536	0.688085	0.917927	0.773494	0.241739	0.70899	0.0917317	0.867388	0.65111	0.465934	0.386913	0.932558	0.441557	0.583061	0.0995974	0.0104732
succinic.acid	0.848147	0.0821828	0.157159	0.160897	0.307257	0.0741419	0.256682	0.889348	0.834405	0.807045	0.0162735	0.715771	0.376264	0.887455	0.425404	0.0628801	0.896359	0.269351	0.0212108	0.0215706	0.856472	0.982791	0.392469	0.585076	0.0523414	0.129288	0.191241	0.900483	0.375125	0.443845	0.837234	0.00960253	0.274261	0.634837	0.133599	0.702534	0.922794	0.211363	0.767943	0.745228	0.40656	0.591732	0.983355	0.910431	0.912933	0.147411	0.454223	0.960771	0.152763
stearic.acid	0.829788	0.999718	0.0278088	0.364371	0.17581	0.713758	0.0446579	0.440665	0.796266	0.989326	6.69e-29	0.0422046	0.775062	0.0125236	0.759652	0.68434	0.584217	0.408273	0.0798452	0.144293	0.626535	0.0833902	0.312772	0.437828	0.988235	0.31028	0.352335	0.303221	0.486959	0.629166	0.32321	0.608097	0.472411	0.642268	0.949106	0.641836	0.444064	0.543983	0.907422	0.878293	0.844942	0.795526	0.972259	0.79491	0.554381	0.901649	0.605773	0.0492418	0.0157302
squalene	0.359651	0.66513	0.0383945	0.0514887	0.234007	0.66321	0.244012	0.0176579	0.0390013	0.190013	0.543979	0.181297	0.341898	0.414593	0.468337	0.653983	0.694784	0.180899	0.0719776	0.181197	0.687139	0.288114	0.0981494	0.958478	0.4484	0.967375	0.844413	0.83823	0.465251	0.863314	0.49157	0.607653	0.64909	0.44222	0.479448	0.649657	0.994363	0.194989	0.715543	0.499767	0.622928	0.488088	0.653312	0.698825	0.376641	0.169651	0.967924	0.566953	0.815421
spermidine.minor	0.354145	0.109223	0.380899	0.152007	0.433741	0.683365	0.538554	0.143369	0.543023	0.0306204	0.00313611	0.97836	0.51774	0.167286	0.520861	0.940058	0.443233	0.245028	0.909272	0.790632	0.200766	0.402644	0.21981	0.398315	0.595491	0.0206132	0.0821474	0.790005	0.832492	0.632123	0.678925	0.964139	0.427052	0.682945	0.077694	0.53566	0.278624	0.827073	0.452726	0.724242	0.97122	0.0935885	0.947286	0.650733	0.259174	0.0501034	0.948695	0.868845	0.235809
spermidine	0.332271	0.607291	0.030413	0.256409	0.846999	0.0812293	0.975404	0.0817888	0.425164	0.689652	1.73e-09	0.882828	0.504918	0.922467	0.206595	0.123262	0.69599	0.575643	0.821365	0.52674	0.0917607	0.234046	0.385879	0.711637	0.719691	0.961307	0.0847466	0.874474	0.700655	0.565373	0.739327	0.239568	0.773754	0.182595	0.141024	0.646475	0.322653	0.597301	0.312102	0.528501	0.577387	0.619941	0.340611	0.281954	0.509864	0.257394	0.203632	0.19203	0.411687
sorbitol	0.602524	0.163296	0.540011	0.109183	0.833215	0.584846	0.323396	0.477602	0.698962	0.434412	0.0647065	0.905294	0.545388	0.210764	0.818839	0.666835	0.218627	0.718487	0.798846	0.783905	0.15855	0.870923	0.772363	0.496865	0.506118	0.0347846	0.928639	0.357279	0.363384	0.967308	0.643276	0.529947	0.613772	0.439754	0.268348	0.51865	0.590579	0.174157	0.310107	0.77394	0.263789	0.260298	0.859594	0.55386	0.652964	0.00864441	0.565531	0.536295	0.802577
sophorose	0.804632	0.995908	0.222782	0.522848	0.133418	0.44001	0.287326	0.440583	0.401208	0.282175	0.00324767	0.834416	0.380547	0.715819	0.586166	0.909035	0.970953	0.540009	0.211775	0.530236	0.14297	0.119076	0.304044	0.222934	0.700531	0.393336	0.308207	0.104878	0.161105	0.160794	0.327678	0.732215	0.391523	0.721547	0.942757	0.482537	0.439717	0.477727	0.0312967	0.195637	0.334407	0.551438	0.168986	0.0933437	0.753996	0.30578	0.55692	0.193934	0.0344324
shikimic.acid	0.959118	0.289398	0.247352	0.0821229	0.733691	0.33558	0.394335	0.18523	0.0210627	0.0420433	0.535057	0.431363	0.310856	0.560557	0.936612	0.138129	0.669763	0.855328	0.0700588	0.0690687	0.312813	0.562578	0.997272	0.222567	0.639629	0.124687	0.661707	0.951156	0.996276	0.113894	0.480387	0.902704	0.377296	0.507029	0.373665	0.148886	0.0546955	0.473284	0.0179997	0.30542	0.626788	0.927858	0.110856	0.115444	0.409095	0.354791	0.230867	0.164408	0.0644952
serine.minor	0.613824	0.776664	0.165148	0.675089	0.611056	0.433646	0.326848	0.818215	0.894711	0.312578	2.88e-07	0.68334	0.271944	0.210239	0.126728	0.920311	0.611034	0.476746	0.797917	0.532955	0.578931	0.00410798	0.032321	0.623647	0.934347	0.654799	0.174559	0.895916	0.861998	0.361583	0.721108	0.719962	0.0150385	0.706026	0.814826	0.981652	0.840386	0.0156703	0.748124	0.3679	0.020847	0.63242	0.91741	0.997285	0.457614	0.084803	0.611818	0.241927	0.277458
serine.4TMS	0.00626334	0.911793	0.854218	0.145789	0.317908	0.466188	0.909696	0.0114509	0.19786	0.782987	2.38e-05	0.989975	0.386549	0.15133	0.415208	0.220108	0.716875	0.420944	0.738512	0.869134	0.286393	0.506824	0.997952	0.154191	0.063917	0.572241	0.949371	0.342654	0.652418	0.972691	0.233946	0.0938303	0.648703	0.487261	0.745457	0.93763	0.82515	0.465698	0.144519	0.890193	0.447162	0.095652	0.593501	0.887136	0.93823	0.680125	0.534404	0.999182	0.267917
serine	0.294646	0.455898	0.554111	0.119907	0.144937	0.897119	0.975172	0.575636	0.165235	0.28547	2.1e-06	0.484447	0.533801	0.674522	0.83347	0.579817	0.3642	0.505118	0.553437	0.900274	0.994267	0.594583	0.418536	0.827658	0.0818004	0.336913	0.954049	0.171357	0.282948	0.700466	0.0449166	0.424609	0.443798	0.495423	0.24166	0.284043	0.666672	0.910963	0.136459	0.866886	0.757046	0.913621	0.866976	0.973524	0.988149	0.954462	0.355586	0.575401	0.653923
salicylic.acid	0.127759	0.0108569	0.44699	0.0413197	0.555281	0.18374	0.595808	0.798115	0.751466	0.235154	0.534921	0.0317547	0.383562	0.617084	0.619617	0.651403	0.232637	0.292896	0.41548	0.669236	0.326522	0.149561	0.159832	0.131994	0.293108	0.474174	0.665543	0.547451	0.655973	0.517112	0.297676	0.952557	0.714915	0.327889	0.396031	0.71665	0.711297	0.459966	0.0866522	0.906181	0.720299	0.776611	0.750203	0.82916	0.793795	0.974877	0.894885	0.832034	0.773925
salicin	0.0108673	0.381128	0.15716	0.178103	0.385143	0.531521	0.989873	0.0451218	0.0618638	0.495049	0.0808018	0.599325	0.197648	0.0361237	0.697052	0.747532	0.357606	0.920815	0.589258	0.370018	0.831437	0.627477	0.763162	0.785102	0.735305	0.0183147	0.928055	0.521769	0.20422	0.853598	0.0964231	0.783208	0.39813	0.56266	0.44218	0.561483	0.9012	0.49326	0.193226	0.646077	0.335314	0.764415	0.928618	0.658841	0.178233	0.500551	0.73584	0.2145	0.305446
ribose	0.0548677	0.180653	0.756592	0.576255	0.025471	0.0414219	0.00312267	0.382798	0.712299	0.711399	0.0396044	0.737998	0.0863835	0.082106	0.0606939	0.339087	0.324581	0.958732	0.844905	0.303922	0.276163	0.5253	0.106705	0.771947	0.76786	0.618976	0.986338	0.0166684	0.0327129	0.227745	0.446836	0.246056	0.367047	0.241106	0.815719	0.154281	0.154351	0.154125	0.732308	0.245911	0.845974	0.789008	0.150925	0.0438171	0.976245	0.299298	0.747387	0.956644	0.0209235
ribitol	0.182999	0.184654	0.467673	0.881097	0.042659	0.607772	0.4594	0.408265	0.267844	0.197758	0.0203777	0.540353	0.0764048	0.00780607	0.0234196	0.660344	0.72231	0.984493	0.888579	0.131034	0.15517	0.414414	0.741228	0.000242296	0.226027	0.640737	0.0264842	0.110441	0.983309	0.11174	0.959002	0.967336	0.818954	0.00391776	0.31353	0.23547	0.265911	0.885437	0.616148	0.734678	0.00280053	0.525608	0.139958	0.0582395	0.338832	0.444413	0.446794	0.811741	0.802505
raffinose	0.164882	0.518225	0.749283	0.366971	0.612923	0.506417	0.648432	0.22469	0.569309	0.842255	0.000326833	0.714078	0.828264	0.848439	0.834699	0.0530446	0.877266	0.467082	0.511961	0.966315	0.0318928	0.17779	0.737612	0.199743	0.187933	0.623271	0.275255	0.803172	0.652759	0.477555	0.408021	0.798891	0.981616	0.0239702	0.881259	0.992342	0.73334	0.796085	0.481369	0.406501	0.680613	0.574748	0.80439	0.63074	0.464652	0.488621	0.783088	0.506408	0.156969
pyrophosphate	0.767815	0.0393697	0.260608	0.46732	0.358922	0.312301	0.957899	0.670401	0.840048	0.741468	0.0998764	0.487327	0.822482	0.970071	0.00433496	0.831242	0.367154	0.650673	0.259884	0.225905	0.720993	0.100961	0.0692529	0.134648	0.299937	0.280888	0.225921	0.228265	0.202583	0.392148	0.736657	0.437462	0.863861	0.0734584	0.58029	0.842349	0.999556	0.169823	0.872377	0.348491	0.0879703	0.347762	0.839	0.88269	0.473574	0.885648	0.314546	0.833283	0.193925
putrescine	0.756353	0.446627	0.495591	0.00349419	0.317634	0.601346	0.241977	0.152438	0.168152	0.64427	0.00211485	0.640043	0.271937	0.606769	0.683527	0.171081	0.797439	0.401263	0.595843	0.989795	0.973424	0.0627865	0.567482	0.293794	0.0963386	0.190462	0.323834	0.201942	0.456411	0.751603	0.409779	0.734829	0.878293	0.0920655	0.0382228	0.0521374	0.114673	0.318633	0.667983	0.281361	0.674472	0.01104	0.0381148	0.156923	0.421641	0.810257	0.00909135	0.39324	0.117921
propane.1.3.diol.NIST	0.0174832	0.166133	0.0412613	0.0963827	0.682959	0.546239	0.738156	0.465213	0.190441	0.253174	0.990357	0.381768	0.308191	0.441914	0.972391	0.940649	0.243337	0.372864	0.183462	0.800651	0.0764232	0.487225	0.397138	0.373354	0.0186424	0.671554	0.885044	0.286107	0.21791	0.29587	0.615781	0.450261	0.583254	0.13696	0.66756	0.38242	0.76813	0.0733261	0.0311064	0.834724	0.54031	0.621051	0.122781	0.216488	0.329956	0.531185	0.568464	0.0226351	0.237411
proline	0.473159	0.371588	0.788396	0.639836	0.201437	0.618916	0.492234	0.0846912	0.052638	0.381881	0.158222	0.070434	0.486012	0.348596	0.512168	0.240988	0.789546	0.38938	0.702764	0.749582	0.220985	0.234388	0.591561	0.483502	0.989277	0.432558	0.631339	0.72052	0.701751	0.381579	0.125215	0.488184	0.682803	0.278244	0.239556	0.626703	0.224725	0.76598	0.563272	0.672808	0.860413	0.593844	0.233863	0.222903	0.313173	0.835469	0.792362	0.810472	0.788499
phytol	0.442818	0.0685284	0.558111	0.712757	0.0204011	0.41795	0.58718	0.75076	0.56008	0.825552	0.0598955	0.920617	0.632039	0.765823	0.389522	0.2808	0.818852	0.568515	0.916356	0.609739	0.922233	0.112078	0.271172	0.50825	0.0533771	0.834873	0.0363509	0.155901	0.893588	0.0987664	0.903499	0.227991	0.596299	0.752304	0.636701	0.392692	0.410468	0.932538	0.890317	0.606104	0.561357	0.460281	0.392518	0.49587	0.0601678	0.507803	0.266968	0.402974	0.662002
phthalic.acid	0.0655874	0.609773	0.835337	0.157228	0.0846122	0.0841648	0.432236	0.170836	0.105004	0.335574	9.15e-07	0.586345	0.391503	0.0230875	0.54361	0.413616	0.893724	0.608688	0.454329	0.993321	0.87643	0.667385	0.777133	0.236916	0.329931	0.617848	0.720974	0.484036	0.37042	0.180727	0.576676	0.0393772	0.251463	0.0485304	0.0628953	0.848641	0.298047	0.788442	0.000712544	0.123624	0.128546	0.013139	0.807211	0.575312	0.761279	0.191839	0.083528	0.116015	0.791944
phosphoric.acid	0.206531	0.732115	0.457876	0.856306	0.100923	0.774853	0.479083	0.84849	0.692066	0.896471	2.96e-06	0.105653	0.235408	0.407591	0.489369	0.517706	0.437857	0.406827	0.469848	0.660371	0.28921	0.866378	0.977832	0.542613	0.344287	0.034229	0.741755	0.136055	0.656913	0.524082	0.105254	0.617999	0.645868	0.416889	0.447193	0.460667	0.589187	0.305426	0.676182	0.258472	0.627035	0.716883	0.697826	0.717788	0.119143	0.796892	0.106977	0.0297325	0.620395
phenylalanine.TMS1x	0.225783	0.250454	0.684992	0.443474	0.756263	0.291275	0.842642	0.842879	0.47557	0.946068	0.000275002	0.411575	0.834764	0.639181	0.761224	0.76443	0.113766	0.69382	0.494641	0.854654	0.234796	0.545025	0.80761	0.253913	0.718147	0.0612758	0.595345	0.677833	0.513106	0.529429	0.610612	0.696342	0.397035	0.506166	0.971141	0.149504	0.217272	0.790897	0.526078	0.981623	0.197768	0.924828	0.273486	0.440771	0.898517	0.51948	0.451743	0.492731	0.695812
phenylalanine	0.349746	0.0188659	0.676313	0.100953	0.153197	0.296124	0.743109	0.897767	0.907488	0.947224	0.00563173	0.709537	0.692113	0.625741	0.997626	0.244961	0.841014	0.506639	0.65005	0.231946	0.524015	0.0282759	0.97261	0.680544	0.503216	0.444636	0.628951	0.736533	0.889859	0.207135	0.2557	0.40049	0.0831882	0.739382	0.235996	0.179953	0.0287365	0.666919	0.449809	0.390336	0.192486	0.668103	0.203412	0.0924041	0.64748	0.395986	0.45045	0.850787	0.820307
phenol	0.25696	0.501344	0.556331	0.865009	0.853069	0.0910394	0.0874208	0.276977	0.845134	0.358795	3.26e-13	0.13025	0.863046	0.391601	0.260639	0.325592	0.361545	0.403541	0.208824	0.112712	0.878626	0.743548	0.465046	0.483833	0.322517	0.601109	0.233848	0.0102333	0.304812	0.358317	0.252842	0.273778	0.0487007	0.386092	0.512586	0.126426	0.262021	0.152688	0.194155	0.994373	0.790173	0.704871	0.141717	0.266869	0.398743	0.660471	0.973446	0.258941	0.00895246
pentadecanoic.acid	0.033445	0.00635712	0.619602	0.401192	0.58812	0.629917	0.941371	0.647007	0.797317	0.863255	2.53e-05	0.286126	0.974973	0.543375	0.123972	0.113843	0.370763	0.563356	0.704029	0.203709	0.526512	0.244588	0.705895	0.0221555	0.199823	0.623494	0.168679	0.239913	0.512803	0.449541	0.947694	0.22427	0.0543376	0.225093	0.646042	0.584016	0.642909	0.755794	0.542691	0.182006	0.852135	0.632862	0.376018	0.376714	0.0743679	0.680311	0.219779	0.728888	0.884547
pelargonic.acid	0.768054	0.156438	0.451982	0.00397495	0.382499	0.86906	0.0144963	0.0192231	0.974154	0.938357	0.163431	0.887636	0.0365146	0.109536	0.107655	0.4676	0.574536	0.36025	0.166552	0.227039	0.418534	0.172861	0.466512	0.216484	0.0785886	0.0371299	0.271253	0.985556	0.671498	0.585261	0.0141259	0.0445768	0.0233897	0.150952	0.332153	0.291412	0.16318	0.404797	0.390625	0.550098	0.357837	0.683215	0.119378	0.060974	0.365184	0.137771	0.0163243	0.095775	0.0841543
palmitoleic.acid	0.918957	0.944707	0.904576	0.1616	0.120777	0.115885	0.202997	0.965389	0.962693	0.489735	1.36e-07	0.595304	0.0662523	0.136298	0.790149	0.489349	0.601533	0.73168	0.610718	0.953022	0.0590109	0.312778	0.911352	0.00119572	0.0841121	0.443816	0.13228	0.298214	0.623334	0.96079	0.263646	0.132505	0.0112934	0.00373925	0.465251	0.616787	0.899893	0.040541	0.570969	0.378307	0.0806263	0.789864	0.878843	0.796353	0.387232	0.544009	0.233078	0.877439	0.656039
palmitic.acid	0.689532	0.144777	0.002528	0.677857	0.0657865	0.789839	0.80321	0.507713	0.88012	0.87514	1.72e-24	0.0721631	0.157886	0.401267	0.89813	0.138664	0.76283	0.620352	0.477846	0.830889	0.839444	0.981805	0.86098	0.188321	0.0398171	0.388924	0.176067	0.452084	0.554349	0.872402	0.499569	0.670447	0.645605	0.935836	0.525106	0.644895	0.744129	0.0958539	0.934706	0.757641	0.651819	0.547835	0.964447	0.684556	0.43095	0.0633696	0.876352	0.66597	0.247337
oxoproline	0.640173	0.664266	0.877335	0.614578	0.547479	0.14923	0.560211	0.403899	0.785939	0.774989	0.00653404	0.511835	0.540163	0.999414	0.455608	0.667169	0.000897665	0.200636	0.233269	0.940202	0.389938	0.642147	0.440938	0.877012	0.745991	0.012788	0.0140696	0.136704	0.62461	0.198944	0.483996	0.970905	0.202238	0.232717	0.921493	0.465458	0.514155	0.533621	0.578032	0.453418	0.19316	0.286626	0.783105	0.86897	0.526764	0.316267	0.182163	0.424025	0.199888
ornithine.4TMS	0.203023	0.233631	0.792817	0.845199	0.0412007	0.446461	0.509654	0.705422	0.684068	0.459795	2.05e-08	0.957025	0.478628	0.889239	0.557238	0.391136	0.91424	0.925427	0.667262	0.262523	0.0196925	0.523607	0.152215	0.00818101	0.0916166	0.621522	0.385804	0.558278	0.988442	0.551299	0.938943	0.259282	0.299379	0.149642	0.754181	0.971594	0.942306	0.826572	0.990189	0.336624	0.81668	0.662638	0.802861	0.600099	0.121568	0.0750669	0.634715	0.706649	0.705552
oleic.acid	0.0463665	0.250756	0.987002	0.787713	0.459822	0.8049	0.284859	0.522113	0.316627	0.404303	0.686914	0.436803	0.773944	0.418215	0.965268	0.137025	0.10563	0.574608	0.251497	0.133299	0.509542	0.167616	0.662957	0.384041	0.107822	0.668961	0.632223	0.39249	0.981687	0.652076	0.756398	0.618481	0.448235	0.808433	0.856758	0.976471	0.553759	0.967016	0.545011	0.825349	0.874551	0.76601	0.865003	0.907714	0.719465	0.703576	0.933545	0.951857	0.590173
octadecanol	0.207194	0.500472	0.955923	0.0144529	0.114685	0.0324942	0.38749	0.607202	0.87075	0.754991	2.04e-13	0.362672	0.244351	0.479066	0.497114	0.71823	0.682103	0.549209	0.659683	0.684062	0.171437	0.316515	0.893599	0.503467	0.61585	0.959319	0.21219	0.483879	0.792783	0.612088	0.0509503	0.447508	0.833719	0.522861	0.839306	0.661827	0.245985	0.327807	0.73307	0.464314	0.756523	0.330339	0.752763	0.261196	0.492158	0.922728	0.862675	0.406453	0.517845
N.methylalanine	0.371595	0.686686	0.334136	0.7194	0.53362	0.361992	0.46169	0.102351	0.592297	0.831145	0.373396	0.0564784	0.37695	0.398412	0.605015	0.798714	0.727147	0.397131	0.183654	0.0320166	0.434242	0.922602	0.916541	0.736841	0.373149	0.993185	0.289036	0.975082	0.569964	0.394262	0.738391	0.53513	0.147808	0.648843	0.176266	0.861712	0.699187	0.88076	0.394128	0.108009	0.998828	0.646891	0.42347	0.431628	0.219196	0.979538	0.491977	0.821579	0.233602
N.acetylglutamate	0.0442918	0.974632	0.279426	0.669128	0.275433	0.54655	0.835686	0.874281	0.964355	0.39044	0.0272978	0.845752	0.598165	0.284232	0.464293	0.746165	0.0683555	0.78204	0.471718	0.257791	0.609975	0.182643	0.592722	0.353324	0.324814	0.877688	0.598744	0.755973	0.908572	0.371389	0.375329	0.868291	0.773006	0.722108	0.95762	0.651066	0.321314	0.354403	0.222199	0.104782	0.645174	0.0666157	0.596431	0.222055	0.236228	0.605265	0.150929	0.798637	0.69807
myristic.acid	0.745741	0.228554	0.486098	0.523461	0.436812	0.290794	0.305183	0.640766	0.0802182	0.626442	8.25e-09	0.103917	0.735278	0.0405008	0.01972	0.085949	0.70936	0.259491	0.751656	0.971011	0.438645	0.307584	0.979498	0.564226	0.403598	0.975226	0.276892	0.301961	0.262732	0.144773	0.852674	0.706086	0.34747	0.531655	0.246613	0.166537	0.261975	0.469344	0.709988	0.248497	0.78748	0.661458	0.490739	0.674677	0.546399	0.617775	0.596767	0.271094	0.193957
monopalmitin.1.glyceride	0.582707	0.602644	0.933352	0.528442	0.656693	0.406681	0.350412	0.0664948	0.232849	0.814979	0.507133	0.838556	0.958571	0.462745	0.532508	0.944855	0.975709	0.372389	0.378948	0.521585	0.830038	0.811534	0.865918	0.54109	0.325783	0.144942	0.739401	0.658699	0.447311	0.502539	0.237318	0.312128	0.0787443	0.831583	0.756619	0.876352	0.731205	0.431823	0.476994	0.401002	0.765925	0.807119	0.573104	0.641229	0.553327	0.29805	0.652474	0.893407	0.863174
methionine.sulfoxide	0.131753	0.00255233	0.100313	0.115565	0.623097	0.365258	0.133566	0.233869	0.17915	0.940673	9.35e-14	0.114527	0.571971	0.381348	0.778588	0.318925	0.00468731	0.476379	0.336728	0.309771	0.147271	0.222246	0.506722	0.597556	0.0243272	0.684519	0.635711	0.587562	0.512594	0.402984	0.794292	0.964268	0.920148	0.134959	0.539749	0.579515	0.962353	0.310478	0.154682	0.268707	0.213551	0.412531	0.989347	0.750126	0.497097	0.214014	0.061995	0.456628	0.720808
methionine	0.921508	0.928213	0.924631	0.463272	0.31452	0.97602	0.178684	0.742437	0.429296	0.33042	8.01e-08	0.956851	0.730337	0.65164	0.36892	0.831721	0.754674	0.0162229	0.555517	0.914855	0.508547	0.195374	0.210307	0.765643	0.398081	0.615231	0.211558	0.344776	0.231138	0.256951	0.865421	0.897141	0.444279	0.3046	0.0589762	0.0407237	0.269105	0.379698	0.27889	0.757959	0.176314	0.16891	0.11903	0.240919	0.00306102	0.810344	0.543997	0.171319	0.336374
mannonic.acid.NIST	0.157009	0.258587	0.805568	0.198958	0.102614	0.454536	0.148303	0.551398	0.137603	0.191928	0.0231402	0.627133	0.306991	0.283511	0.0364261	0.868864	0.409292	0.453891	0.897498	0.854646	0.331904	0.683941	0.564905	0.051913	0.00627458	0.225451	0.976518	0.907748	0.472541	0.907945	0.996515	0.149861	0.891651	0.130518	0.534689	0.69522	0.478004	0.922543	0.121146	0.214512	0.0510175	0.532151	0.417526	0.481728	0.173412	0.226442	0.836295	0.905908	0.606905
maltose.1	0.015891	0.854575	0.896689	0.381392	0.731198	0.910509	0.565618	0.241489	0.290049	0.165921	3.07e-08	0.0845359	0.598753	0.454072	0.856241	0.0730357	0.368814	0.88641	0.647669	0.720258	0.072555	0.8908	0.140783	0.324547	0.355682	0.960125	0.35732	0.432583	0.926041	0.914834	0.430701	0.929859	0.946962	0.862135	0.531737	0.302192	0.33346	0.162334	0.474132	0.930181	0.827247	0.12134	0.663382	0.471686	0.243981	0.681236	0.936044	0.442213	0.206435
maleic.acid	0.368575	0.652697	0.396475	0.341883	0.371244	0.274733	0.88529	0.0942167	0.049341	0.00974569	0.00228179	0.803533	0.110604	0.920331	0.227806	0.737476	0.963737	0.551722	0.0285982	0.0109106	0.485528	0.793639	0.50032	0.930711	0.943403	0.718689	0.504789	0.422411	0.361786	0.735181	0.507517	0.454801	0.810102	0.63718	0.299058	0.415041	0.846095	0.562494	0.431438	0.155169	0.171588	0.0438187	0.317988	0.853055	0.829381	0.54957	0.282443	0.822299	0.0558116
lysine	0.913552	0.599845	0.626402	0.862574	0.215975	0.152449	0.453569	0.124855	0.325075	0.989586	0.269545	0.58879	0.936848	0.797094	0.579875	0.293238	0.116091	0.708766	0.113662	0.164658	0.125347	0.973283	0.386248	0.819995	0.845499	0.631955	0.479764	0.520313	0.490822	0.881732	0.746203	0.0356605	0.897498	0.579512	0.571389	0.149477	0.138303	0.202454	0.523353	0.184611	0.701237	0.664895	0.212297	0.108386	0.437784	0.359463	0.894579	0.178083	0.756808
linolenic.acid	0.581897	0.548418	0.122656	0.312516	0.458633	0.758526	0.569239	0.414819	0.816656	0.352971	5.65e-08	0.295884	0.585652	0.817799	0.550315	0.132469	0.896631	0.578387	0.117717	0.0527598	0.434418	0.35472	0.571331	0.244589	0.340759	0.732878	0.768913	0.34305	0.253224	0.619428	0.0180135	0.577848	0.0200834	0.926691	0.634574	0.297145	0.708632	0.636576	0.259632	0.678397	0.15833	0.598069	0.496063	0.766585	0.700494	0.630026	0.499855	0.0888359	0.0130941
linoleic.acid	0.480452	0.962332	0.716059	0.608496	0.81904	0.187732	0.904111	0.591632	0.647351	0.794952	3.61e-17	0.692786	0.559971	0.948852	0.904282	0.388802	0.436247	0.656865	0.723509	0.903761	0.917752	0.847391	0.829243	0.741278	0.627107	0.75626	0.657562	0.176142	0.44879	0.265155	0.529408	0.701087	0.818171	0.184215	0.645629	0.373553	0.465031	0.561863	0.766183	0.199006	0.210501	0.457315	0.714759	0.678986	0.12974	0.922222	0.626351	0.313785	0.114293
levoglucosan	0.727598	0.0900323	0.179671	0.854041	0.737324	0.260088	0.904841	0.79996	0.859292	0.940081	7.48e-15	0.465998	0.155242	0.545786	0.0675723	0.967693	0.17403	0.0439578	0.0311535	0.0518228	0.74514	0.241552	0.095131	0.0662406	0.359113	0.351868	0.138992	0.0553411	0.275648	0.488795	0.862124	0.64723	0.788843	0.333704	0.340373	0.47661	0.38336	0.759213	0.201601	0.690647	0.167959	0.648578	0.647278	0.74582	0.146026	0.599816	0.16711	0.595979	0.145427
leucrose	0.658889	0.0360914	0.08365	0.0411292	0.104341	0.200956	0.843577	0.647709	0.325372	0.271238	2.05e-18	0.633608	0.281721	0.998274	0.167895	0.762221	0.170006	0.737394	0.15311	0.0865151	0.523155	0.00576612	0.0868466	0.656613	0.421983	0.305566	0.447412	0.508933	0.422079	0.593632	0.0648041	0.332018	0.0939544	0.139034	0.750165	0.499417	0.259152	0.623434	0.38304	0.318448	0.419399	0.515299	0.396151	0.267676	0.764948	0.344831	0.073527	0.75143	0.0690986
leucine	0.557127	0.845804	0.959979	0.815412	0.543961	0.945067	0.0505492	0.207186	0.997172	0.86215	3.98e-05	0.919401	0.370845	0.706176	0.20248	0.182086	0.049865	0.762754	0.0272926	0.0135692	0.126809	0.207004	0.25012	0.522052	0.242522	0.634756	0.492591	0.59974	0.495116	0.978798	0.438468	0.931484	0.854593	0.994241	0.758703	0.385919	0.25624	0.841939	0.898425	0.945559	0.791605	0.963983	0.862405	0.827866	0.736542	0.243813	0.956007	0.35169	0.438449
lauric.acid	0.367914	0.749085	0.859843	0.715603	0.978684	0.752785	0.982205	0.287942	0.575841	0.121185	3.74e-08	0.156323	0.874391	0.629328	0.102503	0.647245	0.0823746	0.456141	0.846082	0.460514	0.362791	0.539355	0.798701	0.699616	0.98441	0.536282	0.635598	0.818664	0.590768	0.160053	0.774037	0.685796	0.744229	0.766908	0.214365	0.197453	0.138217	0.486621	0.784375	0.681117	0.767319	0.524101	0.327072	0.26027	0.858504	0.355403	0.674821	0.0294682	0.180153
lactobionic.acid	0.0107826	0.712618	0.693387	0.905178	0.8528	0.027884	0.0861879	0.679432	0.958851	0.429465	4.55e-05	0.515533	0.120361	0.6083	0.193025	0.0644351	0.790257	0.980895	0.516078	0.00929148	0.068022	0.720136	0.326555	0.370979	0.597403	0.527795	0.484475	0.973182	0.691809	0.235408	0.77948	0.964735	0.0144642	0.894821	0.433574	0.180272	0.274107	0.247023	0.0515549	0.420909	0.35577	0.62408	0.118333	0.21005	0.0726504	0.576267	0.278047	0.0928537	0.00225245
lactic.acid	0.0844991	0.91141	0.543572	0.617691	0.122889	0.255895	0.0286862	0.512165	0.162949	0.721899	4.71e-07	0.0628608	0.824727	0.253701	0.974105	0.987131	0.208439	0.783562	0.765156	0.802232	0.657118	0.00100772	0.0163419	0.121284	0.787886	0.487626	0.694767	0.888666	0.0904509	0.42628	0.908756	0.548891	0.463261	0.258797	0.562891	0.575395	0.972714	0.834768	0.239319	0.180325	0.390412	0.983595	0.582894	0.459756	0.116787	0.0800869	0.0883702	0.778672	0.608072
isonicotinic.acid	0.672343	0.135923	0.185991	0.112512	0.608246	0.700857	0.65889	0.769317	0.205806	0.292094	0.0302954	0.269661	0.171684	0.622983	0.0365958	0.892609	0.286365	0.530461	0.314394	0.991482	0.858123	0.841875	0.325791	0.415104	0.177508	0.285877	0.194217	0.820257	0.122583	0.350093	0.0287404	0.293358	0.419706	0.730577	0.434126	0.982667	0.713704	0.436096	0.543452	0.645436	0.820392	0.319423	0.973764	0.484367	0.167308	0.08174	0.728526	0.247741	0.834166
isoleucine.minor	0.949355	0.25668	0.410538	0.431616	0.331514	0.876277	0.306685	0.868658	0.168869	0.0838301	0.613435	0.905334	0.521553	0.0894767	0.976862	0.151974	0.462304	0.500427	0.209996	0.757648	0.691013	0.245894	0.0246267	0.0898673	0.0636985	0.266166	0.965319	0.818912	0.752949	0.528693	0.796261	0.386708	0.831618	0.0742351	0.947952	0.598621	0.284436	0.996519	0.193737	0.457369	0.289607	0.441521	0.827116	0.711476	0.300832	0.814538	0.337829	0.728342	0.625144
isoleucine	0.727339	0.594317	0.949988	0.313519	0.365416	0.590563	0.0640243	0.123128	0.91986	0.829068	3.52e-05	0.976558	0.838984	0.528294	0.33627	0.414826	0.0428891	0.823352	0.168335	0.0970594	0.649889	0.0695094	0.119067	0.521646	0.164031	0.353711	0.86203	0.782948	0.777785	0.768526	0.31586	0.33995	0.729116	0.958332	0.675122	0.441194	0.139584	0.689743	0.861259	0.402578	0.88427	0.604276	0.673237	0.410043	0.612251	0.084065	0.690958	0.567815	0.554696
inulotriose.1	0.774091	0.588185	0.633206	0.38428	0.722908	0.0206197	0.703886	0.771301	0.709613	0.223211	4.97e-06	0.207294	0.919798	0.77675	0.274296	0.0766423	0.0647122	0.70768	0.889524	0.28988	0.155923	0.562558	0.168598	0.596307	0.482983	0.0397279	0.39954	0.578152	0.869374	0.530011	0.804523	0.921764	0.172923	0.813819	0.534458	0.763045	0.74934	0.255862	0.803854	0.128715	0.681018	0.92285	0.896884	0.797009	0.925467	0.217842	0.627245	0.277578	0.0707194
inulobiose.2	0.232615	0.623076	0.802322	0.155659	0.520802	0.456838	0.705429	0.98865	0.85972	0.998953	7.17e-09	0.96875	0.4537	0.708777	0.364579	0.751308	0.455391	0.64316	0.581193	0.697934	0.252976	0.712242	0.669263	0.270716	0.463542	0.284067	0.907885	0.319719	0.165628	0.563099	0.596383	0.186188	0.280631	0.800796	0.401761	0.454066	0.371436	0.198443	0.0990492	0.88076	0.857861	0.612641	0.501547	0.510225	0.881381	0.653287	0.968094	0.661342	0.544967
inositol.myo.	0.739142	0.00528353	0.548173	0.398619	0.472775	0.646258	0.267858	0.831897	0.451344	0.126564	0.00102287	0.645564	0.77201	0.612006	0.2924	0.265507	0.478443	0.741457	0.293336	0.193527	0.816902	0.0260533	0.154838	0.751122	0.219145	0.340807	0.274628	0.942464	0.87479	0.127211	0.34335	0.427366	0.0183454	0.1907	0.622455	0.53941	0.521922	0.697645	0.368683	0.346033	0.0144327	0.486979	0.500469	0.622477	0.109726	0.501452	0.357002	0.0404928	0.114937
indole.3.acetonitrile	0.679052	0.993124	0.591951	0.87229	0.964231	0.609743	0.640541	0.903437	0.0438216	0.0668324	0.0178829	0.851309	0.961112	0.356938	0.36795	0.350068	0.381039	0.153718	0.0255588	0.0519386	0.715733	0.101199	0.805283	0.616173	0.432653	0.455609	0.405265	0.971379	0.643228	0.6237	0.251123	0.357538	0.862515	0.515492	0.476145	0.698244	0.69828	0.252898	0.0144332	0.0160941	0.809882	0.211195	0.58592	0.864942	0.975937	0.0140365	0.241249	0.975463	0.622941
hydroxylamine	0.315154	0.216487	0.444794	0.497689	0.153098	0.0304448	0.601894	0.77312	0.44701	0.50548	0.588725	0.400525	0.313844	0.364126	0.181607	0.854894	0.168482	0.396042	0.227541	0.363432	0.920314	0.0764107	0.964666	0.71692	0.207895	0.596823	0.906934	0.483559	0.956615	0.322067	0.82586	0.290794	0.160584	0.37099	0.381395	0.742648	0.651175	0.0885173	0.159991	0.878801	0.347607	0.928239	0.836747	0.538147	0.0434973	0.31397	0.580912	0.744309	0.473631
homoserine.minor	0.437462	0.330628	0.0339171	0.598287	0.476857	0.319376	0.0894254	0.219733	0.644819	0.226822	2.46e-07	0.0300358	0.322532	0.78196	0.0384298	0.219608	0.185871	0.187713	0.844618	0.626399	0.0385928	0.619787	0.309663	0.703186	0.117813	0.402292	0.351746	0.0593632	0.0428666	0.279728	0.787208	0.408953	0.496307	0.956822	0.0768024	0.0937782	0.43515	0.732319	0.614193	0.695532	0.800901	0.586518	0.0718256	0.189131	0.144675	0.972103	0.727918	0.135571	0.0167938
glycolic.acid	0.955006	0.18244	0.421133	0.815725	0.923919	0.813131	0.599118	0.705827	0.316639	0.396739	0.849037	0.938589	0.0700087	0.306532	0.395967	0.803755	0.680588	0.0774445	0.502369	0.735268	0.904126	0.510124	0.245198	0.779106	0.754659	0.559535	0.110198	0.650059	0.239797	0.0412325	0.431159	0.483534	0.156095	0.496839	0.294253	0.772924	0.341251	0.370588	0.655786	0.0520285	0.0777737	0.343374	0.99356	0.778873	0.502431	0.641971	0.894605	0.306381	0.0597528
glycine.TMS1x	0.0492174	0.650632	0.977746	0.885347	0.776495	0.161914	0.0593792	0.487761	0.524374	0.997581	2.27e-12	0.257054	0.492464	0.710634	0.37642	0.43023	0.0801331	0.517049	0.193996	0.35493	0.0515365	0.177284	0.293353	0.3252	0.979457	0.814193	0.657401	0.277095	0.856525	0.396622	0.745611	0.830479	0.139801	0.104814	0.724059	0.0798381	0.0459751	0.3778	0.0572029	0.678181	0.00960094	0.668368	0.0278894	0.0135819	0.963639	0.299084	0.749174	0.224305	0.277429
glycine	0.965622	0.0563915	0.907617	0.555287	0.712056	0.400819	0.222113	0.0731947	0.955219	0.536463	8.45e-06	0.1885	0.861516	0.695204	0.0908401	0.0680553	0.00198788	0.576749	0.427028	0.548853	0.53314	0.154928	0.940685	0.601842	0.959389	0.381924	0.838159	0.688563	0.66805	0.0655532	0.791251	0.874234	0.705268	0.316	0.996959	0.073171	0.0880317	0.446318	0.542312	0.726378	0.234714	0.701939	0.069711	0.056477	0.551617	0.957528	0.343694	0.174094	0.351515
glycerol.3.galactoside	0.00340682	0.75299	0.480951	0.99985	0.384871	0.673177	0.0530867	0.921645	0.883367	0.262683	0.00090313	0.225283	0.350795	0.239349	0.237556	0.352603	0.218411	0.968144	0.780715	0.636627	0.639001	0.859333	0.0102738	0.0511593	0.848558	0.771558	0.457747	0.0792301	0.00540904	0.770322	0.687146	0.00822733	0.0664819	0.41971	0.732398	0.455646	0.188034	0.326521	0.00134289	0.0469959	0.50175	0.238016	0.198921	0.0822227	0.157229	0.955912	0.794971	0.519158	0.61348
glycerol	0.0463945	0.260693	0.411535	0.160678	0.230521	0.397542	0.332239	0.385239	0.619037	0.16836	6.46e-14	0.656339	0.239753	0.732459	0.0827221	0.722681	0.428957	0.972404	0.0394655	0.0824641	0.0457187	0.102334	0.263808	0.548091	0.0600525	0.819838	0.336785	0.466475	0.324301	0.528063	0.813355	0.807198	0.514788	0.0610588	0.177972	0.923349	0.564242	0.753917	0.361418	0.557826	0.155286	0.564782	0.677952	0.530874	0.222403	0.258803	0.448017	0.303222	0.412025
glyceric.acid	0.735319	0.498901	0.191004	0.433292	0.8459	0.129917	0.461949	0.338804	0.812867	0.957561	6.77e-10	0.142965	0.437807	0.79986	0.833913	0.706281	0.700731	0.680086	0.341653	0.560889	0.845423	0.920118	0.627247	0.980198	0.20289	0.558499	0.904778	0.787915	0.954395	0.661591	0.854245	0.667097	0.197516	0.0730171	0.177734	0.580534	0.147393	0.509642	0.818129	0.306091	0.25899	0.321939	0.417575	0.0970078	0.0643204	0.205739	0.862911	0.0196791	0.744824
glutamine	0.0880545	0.483073	0.530922	0.353242	0.901048	0.387621	0.970916	0.383492	0.958268	0.309911	2e-06	0.390493	0.780069	0.645649	0.0246266	0.363799	0.305268	0.652416	0.517556	0.273405	0.786612	0.921459	0.412312	0.210435	0.604807	0.538392	0.0221059	0.0520303	0.479311	0.161667	0.956497	0.612775	0.552368	0.269664	0.472071	0.302071	0.670915	0.77642	0.365781	0.310269	0.205633	0.35844	0.351386	0.829659	0.821873	0.00645769	0.104171	0.793167	0.51779
glutamic.acid	0.232876	0.535466	0.338212	0.65719	0.0836077	0.382807	0.314298	0.638429	0.917091	0.889169	0.00729435	0.401667	0.724776	0.486635	0.0263808	0.0907749	0.377199	0.0864884	0.47333	0.921432	0.78042	0.323376	0.334132	0.429911	0.0250328	0.213328	0.513429	0.242086	0.163094	0.942397	0.383813	0.218346	0.421215	0.152655	0.307602	0.553295	0.792251	0.0852027	0.733189	0.659333	0.48321	0.823613	0.794527	0.773136	0.755814	0.545856	0.445066	0.173332	0.70574
glutamate.TMS2x	0.788379	0.00645108	0.3256	0.240758	0.267362	0.12108	0.105066	0.210264	0.635489	0.178242	0.691856	0.25226	0.152723	0.0557342	0.0683488	0.907502	0.974405	0.648311	0.631093	0.430029	0.87617	0.233	0.122946	0.000555981	0.0419948	0.00090295	0.168165	0.21611	0.105564	0.355174	0.704918	0.00289026	0.910038	0.792112	0.697151	0.727382	0.889036	0.580956	0.117193	0.846589	0.387398	0.157694	0.31041	0.676951	0.902145	0.607616	0.706611	0.811807	0.299523
glucuronic.acid	0.136815	0.875956	0.64902	0.541128	0.737057	0.176698	0.698413	0.819868	0.298789	0.703796	0.681385	0.0324367	0.00390545	0.0132932	0.252313	0.444915	0.685949	0.579816	0.368687	0.719362	0.00081251	0.839602	0.993839	0.0506095	0.337838	0.014897	0.357381	0.246958	0.0199662	0.32521	0.545595	0.64604	0.75408	0.44023	0.807622	0.917075	0.886557	0.752918	0.154353	0.653599	0.245256	0.579098	0.737912	0.955015	0.740147	0.0581069	0.825945	0.151308	0.11517
glucose.6.phosphate.2	0.245071	0.151288	0.743693	0.636476	0.23842	0.41276	0.301281	0.721424	0.142314	0.50646	6.71e-06	0.0941366	0.285588	0.550715	0.0156799	0.709571	0.79973	0.994335	0.858503	0.156867	0.729353	0.608824	0.608686	0.387402	0.522127	0.862279	0.525275	0.849174	0.464493	0.276517	0.415847	0.108692	0.927673	0.882574	0.724511	0.695234	0.744705	0.546856	0.045746	0.417401	0.758987	0.282469	0.861509	0.668375	0.353736	0.488802	0.702104	0.656406	0.0692211
glucose.2	0.800527	0.987737	0.512165	0.1182	0.604197	0.181749	0.640805	0.676662	0.681334	0.418249	9.83e-06	0.226256	0.115866	0.832869	0.711506	0.0886037	0.949096	0.643012	0.751307	0.601615	0.621798	0.205897	0.595653	0.422047	0.675723	0.933337	0.542879	0.536004	0.359108	0.372909	0.829458	0.603142	0.329729	0.139967	0.86345	0.5477	0.270112	0.951786	0.270563	0.812391	0.0163972	0.642409	0.433458	0.297246	0.748869	0.463121	0.356574	0.249608	0.172246
glucose.1.phosphate	0.559825	0.170318	0.139905	0.640901	0.573996	0.185083	0.482378	0.651581	0.638917	0.793379	6.46e-11	0.729133	0.191066	0.518877	0.035437	0.308718	0.25701	0.0779887	0.0443958	0.130901	0.437583	0.0498151	0.0138124	0.108735	0.960794	0.32959	0.0188256	0.343101	0.961902	0.385943	0.626487	0.993014	0.738022	0.315712	0.532549	0.79207	0.693616	0.0927515	0.0725281	0.340604	0.115367	0.461053	0.791949	0.718767	0.0475663	0.907645	0.402496	0.838717	0.155338
glucose.1	0.759618	0.708122	0.974593	0.708731	0.899079	0.240196	0.79895	0.647125	0.75308	0.368638	9.02e-05	0.196167	0.0714175	0.989178	0.54763	0.228204	0.831255	0.497118	0.522744	0.964222	0.0932995	0.103885	0.158267	0.309635	0.992322	0.826782	0.392068	0.920705	0.759632	0.478688	0.889578	0.832898	0.112474	0.120708	0.715086	0.593741	0.266117	0.762452	0.509545	0.443703	0.0454928	0.855564	0.53363	0.249248	0.607711	0.281662	0.186583	0.149906	0.511874
gluconic.acid.lactone	0.200403	0.0747878	0.728292	0.699672	0.624257	0.097102	0.914653	0.943752	0.099666	0.278427	7.24e-15	0.26364	0.293553	0.372354	0.00606826	0.129934	0.0747944	0.0463871	0.704959	0.700764	0.325736	0.0307372	0.0142318	0.0966985	0.461842	0.918656	0.792739	0.12558	0.14265	0.159354	0.998492	0.677924	0.0954171	0.103776	0.179414	0.741756	0.927234	0.163222	0.173532	0.157945	0.00347161	0.0488987	0.34767	0.778754	0.683614	0.464357	0.00232016	0.764348	0.678946
gluconic.acid	0.00911037	0.688479	0.252057	0.795962	0.0432574	0.0693761	0.451472	0.400179	0.531275	0.503236	1.64e-07	0.844565	0.393633	0.830435	0.770212	0.827685	0.535377	0.355054	0.13746	0.271763	0.0198969	0.922799	0.362142	0.549017	0.200677	0.206839	0.334636	0.651206	0.519013	0.441265	0.277788	0.155164	0.841784	0.69718	0.49025	0.831572	0.892189	0.459343	0.530507	0.651271	0.656985	0.276241	0.866062	0.859442	0.698509	0.92852	0.530932	0.817691	0.245623
glucoheptulose	0.594174	0.117887	0.047822	0.187978	0.223396	0.0941362	0.0556448	0.926717	0.183408	0.0765977	0.000359451	0.33519	0.11519	0.794238	0.0826915	0.628757	0.0350776	0.582252	0.427605	0.833491	0.785531	0.828037	0.634894	0.155126	0.491427	0.847017	0.570492	0.797052	0.417906	0.520727	0.219814	0.510904	0.350495	0.0558584	0.644617	0.163255	0.451672	0.951585	0.0758604	0.710943	0.483347	0.721939	0.127161	0.142641	0.132813	0.892195	0.967953	0.320131	0.0176995
galactose	0.131777	0.358311	0.151377	0.0136502	0.491251	0.455611	0.91221	0.412414	0.30553	0.189559	0.485733	0.0364169	0.0483489	0.010442	0.670983	0.755285	0.969965	0.877849	0.730022	0.650137	0.0282393	0.73444	0.880797	0.835507	0.438188	0.782336	0.52026	0.0674983	0.687142	0.598574	0.617925	0.178961	0.0264066	0.135926	0.957128	0.0684177	0.217013	0.0026669	0.30544	0.0121228	0.287213	0.942211	0.0936002	0.13337	0.419515	0.979886	0.970446	0.84588	0.47049
galactonic.acid	0.364856	0.909042	0.359782	0.0797628	0.944721	0.148871	0.939038	0.413459	0.471908	0.973428	0.948261	0.446653	0.991809	0.771011	0.162762	0.255466	0.173724	0.698908	0.494574	0.716025	0.227249	0.920593	0.357386	0.082988	0.155652	0.948206	0.188504	0.233075	0.630032	0.350363	0.110708	0.212225	0.592834	0.412196	0.567422	0.0810865	0.0376074	0.468812	0.117766	0.513793	0.756849	0.722358	0.080929	0.0289399	0.645172	0.671024	0.794494	0.784586	0.661817
galactinol.minor.2	0.576046	0.727348	0.928573	0.208571	0.634507	0.356653	0.00207956	0.0593621	0.557139	0.4116	4.49e-24	0.132828	0.541901	0.869762	0.620393	0.641481	0.314882	0.259421	0.426002	0.776147	0.353337	0.122512	0.499397	0.843769	0.978738	0.494578	0.417032	0.594014	0.51876	0.944226	0.250332	0.976319	0.705457	0.847801	0.00885999	0.93527	0.300457	0.327622	0.00734588	0.0296146	0.366007	0.00961419	0.63284	0.250075	0.538507	0.214916	0.712347	0.462311	0.134535
galactinol.major.2	0.277628	0.0504995	0.214795	0.037694	0.94372	0.228403	0.0982273	0.396955	0.325463	0.91428	0.00983279	0.564279	0.857239	0.63226	0.305441	0.543815	0.500141	0.787052	0.0532771	0.30514	0.753166	0.924501	0.339076	0.388554	0.387052	0.346335	0.86796	0.894258	0.638241	0.640862	0.388639	0.754706	0.93367	0.607896	0.531599	0.624717	0.384311	0.876153	0.0538518	0.69882	0.884066	0.615066	0.496855	0.654593	0.452603	0.325972	0.563043	0.0802883	0.397856
GABA	0.52137	0.779597	0.994584	0.490005	0.408517	0.493225	0.288687	0.625873	0.385898	0.146327	5.85e-08	0.593957	0.18131	0.160426	0.370559	0.846171	0.998646	0.925495	0.670333	0.837646	0.337288	0.392111	0.705	0.164614	0.254384	0.0400601	0.0887941	0.722971	0.364207	0.753323	0.228618	0.284641	0.0986143	0.436073	0.194914	0.736229	0.666724	0.879682	0.189407	0.975594	0.105746	0.860995	0.718545	0.758388	0.205477	0.132092	0.500004	0.910933	0.702909
fumaric.acid	0.206684	0.520258	0.19656	0.176793	0.168156	0.1646	0.461781	0.920893	0.607721	0.780756	0.0671358	0.285357	0.27647	0.660776	0.72066	0.136831	0.242533	0.225498	0.195241	0.464777	0.970631	0.405168	0.961477	0.489831	0.192188	0.640302	0.539377	0.940436	0.823015	0.0515163	0.939792	0.872035	0.980716	0.260021	0.0630438	0.731607	0.967746	0.945202	0.231959	0.525283	0.381799	0.0897442	0.852201	0.933896	0.983272	0.768687	0.465395	0.242796	0.110403
fucose.1...rhamnose.2	0.332857	0.149212	0.585533	0.515716	0.673486	0.573665	0.433234	0.775123	0.433498	0.691767	0.296931	0.30894	0.885238	0.776815	0.0439101	0.897195	0.483076	0.812964	0.47641	0.871709	0.411595	0.302215	0.940585	0.613991	0.532836	0.446835	0.186878	0.996005	0.381596	0.591388	0.277761	0.381826	0.292513	0.575316	0.472102	0.561258	0.406807	0.439017	0.502644	0.530646	0.691669	0.299735	0.345778	0.379691	0.825796	0.353351	0.89299	0.204298	0.744631
fructose.2	0.240594	0.982191	0.332721	0.467183	0.188864	0.135201	0.989185	0.259001	0.855886	0.682665	0.00716337	0.799635	0.3412	0.633462	0.353131	0.662863	0.868275	0.56425	0.596669	0.614536	0.168008	0.331519	0.340672	0.0500634	0.508434	0.994108	0.396493	0.71798	0.949234	0.110112	0.525105	0.773525	0.0477118	0.296062	0.960049	0.338824	0.665237	0.562435	0.592705	0.114594	0.0446754	0.428739	0.354478	0.699688	0.570439	0.379463	0.0548856	0.352352	0.765295
fructose.1	0.804543	0.611564	0.815744	0.671205	0.596974	0.124315	0.34788	0.610455	0.449792	0.487052	0.000732591	0.426529	0.026077	0.341645	0.508095	0.0842761	0.587855	0.515063	0.931511	0.565236	0.606454	0.247669	0.326236	0.37486	0.00939325	0.226966	0.32028	0.386172	0.561656	0.338951	0.0546282	0.979635	0.173286	0.379815	0.28861	0.526561	0.420785	0.467121	0.363846	0.257985	0.569626	0.696744	0.622661	0.721464	0.556201	0.975201	0.227736	0.248282	0.512458
FAD	0.686712	0.535233	0.896693	0.44863	0.774331	0.891726	0.832335	0.273826	0.945142	0.982114	0.000293366	0.90958	0.136651	0.542076	0.843323	0.719211	0.378482	0.668541	0.942849	0.883232	0.354701	0.0948385	0.287936	0.860619	0.586823	0.138607	0.416468	0.441521	0.465178	0.533759	0.964319	0.137562	0.285927	0.855195	0.199804	0.355366	0.771327	0.0721633	0.726229	0.371153	0.564773	0.0996479	0.112208	0.488751	0.696229	0.742737	0.0162518	0.662033	0.521182
ethanolamine	0.525932	0.646889	0.147458	0.434386	0.0712001	0.887337	0.520814	0.778941	0.74584	0.603094	1.31e-08	0.928058	0.412785	0.870425	0.961743	0.497093	0.739768	0.370195	0.725765	0.175154	0.295195	0.251589	0.321514	0.541764	0.340278	0.275707	0.0155015	0.596063	0.819557	0.394398	0.888744	0.257232	0.148499	0.325114	0.477974	0.750899	0.601273	0.963045	0.781913	0.972797	0.380131	0.779885	0.858059	0.65195	0.381635	0.274445	0.686299	0.475022	0.917878
erythrose.1	0.163685	0.60333	0.524919	0.703478	0.0390991	0.667865	0.88821	0.573373	0.10512	0.126486	0.000166926	0.0865863	0.324443	0.347428	0.721922	0.36577	0.318022	0.948075	0.542854	0.169229	0.431657	0.871492	0.661105	0.736385	0.959124	0.627808	0.0621683	0.390599	0.339472	0.755756	0.0389398	0.585285	0.982282	0.374865	0.656129	0.371537	0.601708	0.6811	0.623266	0.944197	0.653648	0.240914	0.720961	0.86963	0.477716	0.630327	0.93567	0.337345	0.693336
erythrose	0.981392	0.410917	0.042369	0.442604	0.656616	0.438783	0.0683834	0.372381	0.190437	0.319062	0.002276	0.582812	0.209013	0.0127467	0.716704	0.366008	0.630862	0.34397	0.844627	0.925462	0.116671	0.187872	0.0537875	0.757269	0.754206	0.43717	0.107396	0.340661	0.88415	0.294854	0.446953	0.665603	0.199135	0.0586067	0.760798	0.654329	0.735317	0.811698	0.371559	0.556324	0.180032	0.274086	0.930059	0.543856	0.0940186	0.66869	0.236793	0.95881	0.386876
erythronic.acid.lactone	0.376465	0.276166	0.644289	0.205805	0.632448	0.466467	0.0487223	0.567478	0.581937	0.327739	7.12e-05	0.037173	0.693858	0.965222	0.496668	0.0335844	0.953723	0.844118	0.120867	0.265509	0.717757	0.226357	0.729212	0.934579	0.449148	0.217207	0.561367	0.538305	0.725317	0.970886	0.670676	0.0638651	0.0786771	0.127775	0.171449	0.681874	0.52616	0.624361	0.427973	0.160684	0.967966	0.848082	0.89387	0.726822	0.985787	0.529194	0.995034	0.285264	0.13959
erythronic.acid	0.815474	0.0455327	0.848642	0.401201	0.0292685	0.698408	0.903392	0.926593	0.404041	0.229788	0.368493	0.449581	0.243226	0.0327541	0.947014	0.760004	0.904679	0.45681	0.616589	0.418154	0.438661	0.00271856	0.000544359	0.50308	0.689234	0.511402	0.197127	0.509395	0.740234	0.183833	0.521825	0.166543	0.235919	0.0471061	0.76937	0.52166	0.489716	0.302069	0.0814789	0.166166	0.0145515	0.840623	0.34444	0.281407	0.961638	0.460627	0.902598	0.407128	0.5125
erythritol	0.786438	0.428998	0.853727	0.644914	0.341886	0.43493	0.479457	0.493435	0.276449	0.543456	0.993563	0.472111	0.0641362	0.422328	0.335101	0.856426	0.986082	0.241859	0.245928	0.600085	0.976358	0.893211	0.172248	0.997919	0.912775	0.0501006	0.774851	0.807899	0.28456	0.0290559	0.124	0.273921	0.428174	0.325149	0.888849	0.793649	0.860446	0.484928	0.416076	0.688113	0.903123	0.765705	0.905483	0.879072	0.669126	0.817022	0.920873	0.792362	0.174149
dodecanol	0.244522	0.969135	0.93727	0.21875	0.227524	0.299236	0.431437	0.888342	0.771035	0.798194	0.119363	0.759096	0.773965	0.703331	0.287765	0.748287	0.178701	0.311139	0.617658	0.723319	0.138797	0.870816	0.680269	0.437121	0.397806	0.252884	0.310442	0.325562	0.235795	0.741131	0.229565	0.761783	0.0287381	0.519019	0.632958	0.159649	0.271534	0.455009	0.306006	0.690602	0.446021	0.426099	0.447723	0.85839	0.628734	0.0317242	0.328252	0.606507	0.922262
dodecane	0.387299	0.0707149	0.948641	0.610974	0.175852	0.897463	0.631322	0.826691	0.913921	0.702115	0.00454349	0.27842	0.88888	0.424721	0.709153	0.132384	0.753671	0.277901	0.594256	0.0754688	0.868713	0.161056	0.870217	0.0307807	0.848336	0.560522	0.970513	0.708172	0.110365	0.720663	0.366669	0.257633	0.478467	0.995392	0.895107	0.715037	0.875236	0.676056	0.314164	0.69774	0.944448	0.608506	0.847676	0.946144	0.84172	0.278985	0.863708	0.780989	0.553735
dihydroabietic.acid	0.0489661	0.103447	0.0832971	0.397328	0.434661	0.690294	0.214895	0.02185	0.00814903	0.124964	1.48e-23	0.157128	0.0237754	0.830848	0.835036	0.641493	0.213021	0.005565	0.113035	0.63323	0.257813	0.0197728	0.0595669	0.551042	0.420335	0.0908528	0.427043	0.459352	0.683378	0.105656	0.324364	0.496876	0.659278	0.325943	0.436834	0.552658	0.342032	0.224793	0.426316	0.609145	0.157665	0.443156	0.945792	0.981666	0.900167	0.00751742	0.717438	0.837916	0.184043
diacetone.alcohol.NIST	0.239825	0.0881055	0.500811	0.271369	0.873303	0.146595	0.96761	0.157688	0.70037	0.882001	2.24e-11	0.798839	0.364589	0.290421	0.126655	0.822181	0.231044	0.508491	0.34631	0.831264	0.129835	0.391157	0.117762	0.866171	0.786654	0.679699	0.212581	0.657012	0.799117	0.47971	0.667549	0.69303	0.107611	0.372754	0.353696	0.311877	0.258791	0.376395	0.67548	0.335043	0.253329	0.641078	0.186887	0.144816	0.291533	0.145648	0.911416	0.158142	0.627645
dehydroascorbate.3	0.526712	0.430042	0.903611	0.22349	0.311503	0.843712	0.337514	0.413765	0.688885	0.34367	2.46e-09	0.89794	0.584546	0.0840676	0.914653	0.423048	0.735165	0.955623	0.772886	0.708067	0.382607	0.126667	0.598401	0.870331	0.708895	0.756932	0.0262299	0.736798	0.882155	0.144642	0.475774	0.415064	0.212859	0.903127	0.907859	0.35355	0.327686	0.642842	0.194958	0.795132	0.583933	0.273134	0.745848	0.419474	0.322336	0.832564	0.526821	0.208886	0.0478688
dehydroascorbate.1	0.773739	0.418868	0.767128	0.801583	0.973452	0.411775	0.974494	0.6419	0.297451	0.308323	1.85e-11	0.514834	0.693981	0.149852	0.443333	0.0879148	0.53621	0.903392	0.448221	0.663268	0.78691	0.261557	0.405744	0.813829	0.769616	0.92887	0.137532	0.223387	0.0855253	0.240376	0.338236	0.499215	0.289767	0.536478	0.907507	0.82712	0.826582	0.311817	0.340272	0.76598	0.269152	0.625434	0.771274	0.629312	0.776113	0.830329	0.71917	0.625756	0.0292589
citric.acid	0.820213	0.48903	0.21513	0.694229	0.368015	0.0548602	0.107117	0.0153711	0.864182	0.184261	0.00372128	0.230568	0.429813	0.667449	0.532619	0.031442	0.408376	0.170242	0.532991	0.526578	0.908048	0.255098	0.265979	0.682149	0.0559048	0.0700869	0.215831	0.912241	0.244609	0.924507	0.234788	0.46564	0.880688	0.212312	0.0838449	0.416813	0.603056	0.546604	0.722404	0.629758	0.308655	0.0644129	0.293249	0.969282	0.0381247	0.940061	0.380149	0.226775	0.357388
cis.sinapinic.acid	0.294673	0.0868926	0.0516453	0.207996	0.0961944	0.107949	0.398294	0.19746	0.524946	0.800185	9.94e-11	0.0782137	0.674672	0.131355	0.2657	0.180924	0.0765352	0.923239	0.474876	0.178283	0.107281	0.175134	0.309136	0.313939	0.0948322	0.108968	0.629214	0.335157	0.175589	0.661609	0.23443	0.979692	0.209123	0.598175	0.0218751	0.20614	0.54736	0.66715	0.0184436	0.653266	0.783923	0.73888	0.761509	0.885081	0.195798	0.487648	0.677633	0.241409	0.0821787
cholesterol	0.541887	0.112789	0.31268	0.0640439	0.54862	0.46694	0.419117	0.829186	0.231416	0.059836	0.00925073	0.608436	0.140152	0.897266	0.418607	0.598152	0.958396	0.448461	0.492958	0.600193	0.668075	0.308086	0.783118	0.920148	0.922754	0.8816	0.882339	0.239763	0.181114	0.587356	0.0774133	0.167347	0.588679	0.333503	0.196177	0.54413	0.655204	0.21589	0.679983	0.312048	0.33141	0.262292	0.811883	0.370932	0.594604	0.855149	0.680665	0.329794	0.0980485
chlorogenic.acid.minor	0.190285	0.0863257	0.841054	0.849075	0.0445528	0.46558	0.479537	0.532161	0.100124	0.374412	0.0188251	0.965288	0.320398	0.105657	0.633813	0.171845	0.834987	0.701753	0.680585	0.676901	0.784596	0.574474	0.33385	0.822343	0.0839166	0.417216	0.404585	0.309005	0.256406	0.25326	0.99032	0.198811	0.905237	0.498453	0.35579	0.265791	0.360621	0.505901	0.853766	0.224579	0.222131	0.153862	0.222005	0.435335	0.89034	0.359194	0.507272	0.211678	0.661531
chlorogenic.acid	0.805917	0.0837954	0.543292	0.779823	0.924737	0.193241	0.792933	0.761609	0.0556858	0.145088	0.0205198	0.760389	0.928708	0.463939	0.410063	0.94143	0.585237	0.706344	0.889857	0.965935	0.402141	0.24307	0.0987923	0.926261	0.609706	0.410153	0.67478	0.956889	0.698251	0.227297	0.731499	0.694452	0.429325	0.88675	0.818171	0.93227	0.914809	0.637245	0.993882	0.431874	0.434808	0.780138	0.65505	0.479358	0.924769	0.762953	0.776525	0.1272	0.671994
cellobiotol	0.1109	0.800615	0.194382	0.0610952	0.79072	0.850362	0.0307418	0.810193	0.976299	0.736631	0.290979	0.94436	0.0924618	0.542247	0.231669	0.281328	0.572497	0.28874	0.855227	0.663529	0.157734	0.982564	0.270474	0.022389	0.0763501	0.489172	0.707058	0.29021	0.31842	0.518011	0.314983	0.934011	0.702018	0.902599	0.63685	0.130049	0.23687	0.362099	0.985354	0.370879	0.668439	0.0595207	0.107316	0.225066	0.888228	0.197526	0.529132	0.428333	0.373833
capric.acid	0.599163	0.264011	0.540009	0.754013	0.653991	0.218558	0.212517	0.325563	0.916753	0.865257	0.633466	0.298049	0.193721	0.610242	0.361714	0.707886	0.336797	0.0402317	0.502559	0.258128	0.839083	0.984307	0.895136	0.146368	0.545031	0.888584	0.974502	0.876068	0.375099	0.243711	0.432809	0.785377	0.428015	0.749035	0.95579	0.864717	0.877257	0.395534	0.180433	0.530739	0.536879	0.69907	0.379006	0.397116	0.959629	0.120161	0.184894	0.82622	0.543915
beta.sitosterol	0.5135	0.0447384	0.487426	0.20195	0.271293	0.629579	0.346855	0.990724	0.796258	0.783303	0.867433	0.551891	0.234096	0.731529	0.789145	0.0870235	0.0682007	0.0552346	0.374897	0.673423	0.241808	0.00993329	0.132289	0.814615	0.498231	0.158553	0.614575	0.907321	0.461832	0.193346	0.342948	0.368247	0.0408849	0.248177	0.851427	0.170163	0.245875	0.428889	0.638343	0.400282	0.741325	0.415555	0.0384777	0.181249	0.522396	0.768257	0.67275	0.536456	0.0639594
beta.alanine	0.756515	0.265237	0.538756	0.284326	0.790682	0.0126355	0.401685	0.462117	0.555377	0.70466	0.00379722	0.119448	0.477686	0.857667	0.184658	0.138446	0.187226	0.657619	0.290476	0.64704	0.310282	0.882933	0.649013	0.102866	0.543811	0.775563	0.606212	0.725149	0.453543	0.671639	0.425789	0.484058	0.802075	0.111112	0.56835	0.551451	0.679571	0.0406468	0.911275	0.3322	0.179215	0.065777	0.897902	0.714893	0.0435387	0.0659074	0.352213	0.75507	0.956469
benzoic.acid	0.0859662	0.584001	0.351964	0.596119	0.314209	0.50892	0.412342	0.746805	0.306855	0.476482	5.41e-14	0.845489	0.720631	0.725114	0.388614	0.718865	0.681617	0.591365	0.828787	0.568455	0.840692	0.385322	0.196062	0.976445	0.868191	0.35643	0.895873	0.70151	0.86487	0.21207	0.668967	0.448124	0.974283	0.184605	0.402401	0.792205	0.922697	0.933587	0.590661	0.61895	0.89188	0.637441	0.899033	0.71015	0.362998	0.971286	0.503351	0.991872	0.244086
aspartic.acid	0.865704	0.571235	0.922427	0.327349	0.0695722	0.0883025	0.263047	0.954811	0.578966	0.769258	0.012886	0.393248	0.512216	0.829777	0.702353	0.420206	0.86972	0.187153	0.223896	0.523289	0.828793	0.885889	0.726723	0.241409	0.758533	0.727614	0.42094	0.467067	0.385727	0.966681	0.210083	0.496334	0.544059	0.395304	0.369156	0.383195	0.145066	0.611197	0.15413	0.187511	0.946094	0.691376	0.0754884	0.0920242	0.193151	0.718317	0.431674	0.0834849	0.912818
aspartate.minor	0.610745	0.26679	0.402527	0.487182	0.427665	0.28274	0.494635	0.955915	0.785973	0.837845	0.00440003	0.774997	0.388168	0.82303	0.0456759	0.316153	0.945023	0.511921	0.611175	0.651639	0.945351	0.037046	0.0701058	0.599343	0.225159	0.177031	0.147715	0.0404306	0.0345795	0.433092	0.450547	0.339437	0.915319	0.262274	0.700481	0.348648	0.518832	0.318293	0.945894	0.801591	0.0690621	0.517652	0.0713276	0.218238	0.197063	0.0371101	0.321943	0.881571	0.107265
asparagine.minor	0.974434	0.22582	0.311323	0.996022	0.504395	0.474875	0.761334	0.999839	0.653435	0.402838	0.000147361	0.0701692	0.654687	0.66851	0.556881	0.3614	0.585553	0.725669	0.32592	0.0469259	0.328339	0.858167	0.43768	0.742463	0.865744	0.280791	0.347308	0.787023	0.129492	0.20703	0.991969	0.352934	0.976264	0.689481	0.372164	0.0699648	0.0808689	0.783909	0.875713	0.524307	0.0403392	0.161612	0.140846	0.14415	0.773691	0.206567	0.677916	0.722477	0.673649
asparagine.dehydrated	0.235263	0.674379	0.918231	0.386198	0.584702	0.941331	0.064756	0.697537	0.553865	0.418527	1.98e-15	0.909744	0.459094	0.451867	0.181557	0.175574	0.810997	0.714384	0.224798	0.105786	0.655274	0.15295	0.0826881	0.739407	0.380926	0.112746	0.770162	0.960864	0.35457	0.66681	0.839515	0.858863	0.308197	0.558518	0.21895	0.649936	0.612616	0.74182	0.564353	0.912145	0.158047	0.842591	0.148666	0.119084	0.380651	0.310199	0.67361	0.919368	0.295382
asparagine	0.431113	0.376334	0.418552	0.612615	0.398139	0.054452	0.667122	0.0910579	0.85318	0.886079	0.588506	0.195975	0.235976	0.584083	0.281274	0.32748	0.234516	0.84901	0.226408	0.716352	0.652554	0.813538	0.38807	0.728813	0.151458	0.431438	0.480677	0.651382	0.893967	0.746368	0.288902	0.84003	0.865063	0.220636	0.826218	0.962413	0.887288	0.322124	0.842626	0.883991	0.451891	0.884664	0.899946	0.668629	0.577864	0.687154	0.963382	0.935325	0.487453
ascorbic.acid	0.012813	0.739276	0.0190886	0.0130204	0.44418	0.721939	0.506282	0.157804	0.455702	0.327787	0.00126446	0.454486	0.413659	0.741384	0.126548	0.144782	0.0365311	0.116755	0.470339	0.283708	0.281822	0.90665	0.453644	0.92406	0.154106	0.694476	0.45402	0.894449	0.857597	0.825088	0.788269	0.355925	0.335664	0.041326	0.323979	0.888499	0.848513	0.669214	0.820759	0.732298	0.674973	0.981214	0.830831	0.76552	0.394338	0.105131	0.16193	0.326409	0.101953
arginine...ornithine	0.269024	0.152995	0.195828	0.0273612	0.18278	0.1832	0.432329	0.903187	0.948493	0.900471	0.000706066	0.801751	0.640562	0.516493	0.223183	0.241682	0.708156	0.816934	0.455134	0.632294	0.0344392	0.12113	0.0264474	0.454139	0.71402	0.848958	0.0194145	0.312437	0.468925	0.388617	0.614552	0.679434	0.776024	0.505568	0.623042	0.396533	0.748941	0.258991	0.543719	0.970192	0.424826	0.988323	0.69101	0.895039	0.794566	0.622479	0.338357	0.902183	0.219241
arachidic.acid	0.37498	0.699194	0.0249562	0.288226	0.0670077	0.397764	0.755172	0.316174	0.316547	0.745885	0.0203096	0.999428	0.403329	0.614492	0.486484	0.248838	0.2977	0.198619	0.660407	0.262655	0.126061	0.964251	0.851235	0.561624	0.0913101	0.920826	0.588884	0.656434	0.604182	0.0996272	0.0430889	0.872692	0.46278	0.831948	0.881861	0.904595	0.830215	0.404548	0.622154	0.677773	0.803971	0.274719	0.316314	0.46723	0.583992	0.511181	0.715795	0.536	0.545074
arabitol	0.512155	0.537679	0.230157	0.0447409	0.668083	0.0766466	0.619455	0.180718	0.451084	0.621322	0.157583	0.20113	0.479767	0.345675	0.972794	0.899905	0.932878	0.0264882	0.315991	0.872007	0.884731	0.277537	0.620912	0.037735	0.954685	0.677646	0.00136511	0.0186544	0.390484	0.962212	0.968567	0.869746	0.758318	0.298466	0.468915	0.531698	0.381882	0.990236	0.757444	0.122834	0.352324	0.0993832	0.668827	0.63061	0.760098	0.746304	0.803652	0.0917028	0.115575
arabinose	0.280528	0.270224	0.267839	0.163807	0.299941	0.0279656	0.288012	0.739647	0.385494	0.686507	1.53e-09	0.726197	0.210636	0.421513	0.690717	0.58691	0.780071	0.687465	0.464852	0.779967	0.00264313	0.458241	0.531702	0.521724	0.261058	0.163788	0.488971	0.747845	0.393354	0.688626	0.948608	0.887327	0.638283	0.616554	0.00540514	0.909914	0.313199	0.227843	0.208581	0.155963	0.521991	0.00279275	0.733909	0.17879	0.304747	0.121265	0.0259957	0.022598	0.898842
allantoin.5TMS	0.982207	0.0813752	0.89337	0.669576	0.54281	0.867591	0.685335	0.177087	0.711018	0.445332	0.122813	0.0285418	0.698161	0.304398	0.512318	0.595793	0.8824	0.766112	0.794413	0.905463	0.780517	0.512002	0.875599	0.426223	0.0844054	0.556105	0.886486	0.929345	0.736233	0.0288709	0.993157	0.779477	0.184119	0.693423	0.21246	0.763111	0.290077	0.530211	0.618686	0.265423	0.72633	0.0262137	0.717099	0.342946	0.846197	0.0761612	0.541214	0.303163	0.982616
allantoic.acid	0.708529	0.863046	0.926183	0.394077	0.475368	0.698907	0.0971999	0.725634	0.100074	0.196508	0.0136574	0.614951	0.54322	0.717395	0.262236	0.832477	0.916429	0.56116	0.28453	0.366037	0.915807	0.390952	0.226122	0.410475	0.472217	0.645063	0.532644	0.572515	0.691915	0.239886	0.342064	0.945032	0.23808	0.330366	0.701014	0.198201	0.360339	0.693571	0.120193	0.101416	0.0980614	0.847759	0.126502	0.21031	0.556964	0.00893229	0.145311	0.32713	0.784531
alanine.3TMS	0.28481	0.424175	0.288293	0.170843	0.484094	0.203215	0.465924	0.308513	0.823039	0.986941	0.000637534	0.705975	0.6483	0.823587	0.0880064	0.706512	0.305475	0.722589	0.844896	0.215005	0.00212076	0.19734	0.240322	0.0833548	0.012329	0.0105703	0.00403331	0.361462	0.631792	0.156071	0.0407078	0.651963	0.980332	0.225097	0.970989	0.505031	0.667832	0.340834	0.456431	0.215925	0.0328881	0.461254	0.342473	0.244173	0.731954	0.368127	0.702836	0.00354071	0.0440637
alanine	0.217426	0.590386	0.875475	0.881082	0.96638	0.896846	0.982984	0.812082	0.516959	0.600885	5.51e-05	0.846127	0.102125	0.790209	0.44159	0.481784	0.216879	0.237837	0.222218	0.869574	0.0454827	0.456389	0.188645	0.728432	0.634925	0.626429	0.352632	0.355955	0.0734102	0.719049	0.85015	0.208773	0.605537	0.175404	0.633239	0.0344892	0.0737663	0.646758	0.553803	0.155015	0.0296086	0.533273	0.0493796	0.0409144	0.732153	0.217144	0.2288	0.832926	0.915035
adipic.acid	0.268038	0.593053	0.575253	0.877503	0.807844	0.432182	0.634791	0.984623	0.607124	0.949906	0.398721	0.997882	0.867549	0.735286	0.743345	0.571585	0.929922	0.595529	0.183603	0.339786	0.97403	0.649904	0.910254	0.975409	0.394968	0.405766	0.647834	0.906912	0.849865	0.462681	0.738267	0.718202	0.918295	0.57031	0.503437	0.663914	0.935833	0.388061	0.455591	0.953587	0.780259	0.598758	0.806839	0.846892	0.364625	0.235133	0.120719	0.842225	0.9392
adenosine	0.563373	0.273378	0.103851	0.0704669	0.280204	0.340168	0.582651	0.969408	0.524414	0.974465	0.0650731	0.820899	0.488821	0.619428	0.994196	0.184128	0.277463	0.544305	0.537912	0.489184	0.821847	0.883324	0.707208	0.619903	0.316619	0.462209	0.0831638	0.753525	0.280165	0.847185	0.836344	0.625281	0.228225	0.0791804	0.790848	0.543409	0.442128	0.429386	0.868818	0.728662	0.245535	0.73137	0.255752	0.368767	0.0183579	0.192433	0.515292	0.890805	0.064866
aconitic.acid	0.522978	0.725222	0.0589366	0.794287	0.269988	0.995371	0.482467	0.581723	0.947168	0.350971	0.0895647	0.136653	0.386594	0.612646	0.786815	0.936065	0.712643	0.863621	0.721556	0.450421	0.031664	0.759193	0.854829	0.885565	0.739978	0.719586	0.435069	0.441306	0.0382162	0.317038	0.70083	0.845721	0.387235	0.491813	0.89348	0.762712	0.628123	0.473534	0.930301	0.318467	0.588786	0.450735	0.205002	0.0541384	0.995521	0.543535	0.862964	0.929498	0.302594
X6.hydroxynicotinic.acid	0.187983	0.635226	0.8387	0.988877	0.275137	0.972193	0.000708077	0.411685	0.621499	0.431391	0.0240974	0.199628	0.752275	0.699352	0.964443	0.332011	0.494851	0.747913	0.666412	0.306602	0.0146966	0.0151332	0.177014	0.863657	0.0237988	0.983878	0.0144542	0.116801	0.506702	0.774863	0.953932	0.891141	0.635645	0.869905	0.484617	0.685193	0.301674	0.449839	0.851075	0.285903	0.971429	0.113386	0.963508	0.633381	0.501762	0.999187	0.83494	0.60173	0.836622
X5.methoxytryptamine	0.106327	0.540908	0.518969	0.957569	0.0193618	0.549096	0.975421	0.682478	0.0997545	0.125076	0.245067	0.782649	0.12322	0.321548	0.0940299	0.0225696	0.677301	0.0174048	0.000327451	0.0277952	0.0498184	0.879004	0.927456	0.131692	0.00568381	0.355698	0.379189	0.0965565	0.713426	0.351099	0.36865	0.593139	0.779285	0.432239	0.970672	0.503333	0.906148	0.692739	0.559707	0.84343	0.698076	0.988646	0.364655	0.500859	0.513225	0.859373	0.0800885	0.518675	0.0556091
X4.hydroxyproline	0.188443	0.337751	0.220929	0.405341	0.520766	0.244484	0.279199	0.613532	0.79165	0.84916	0.31645	0.440349	0.710277	0.274785	0.214678	0.221431	0.0116485	0.191512	0.695839	0.170244	0.739428	0.668775	0.81878	0.724246	0.980289	0.0957309	0.724631	0.589301	0.390726	0.448612	0.893078	0.945972	0.373093	0.413785	0.773722	0.941487	0.761841	0.670877	0.96743	0.842865	0.357968	0.430168	0.652269	0.993631	0.0865625	0.090297	0.233433	0.426977	0.360091
X3.hydroxypropionic.acid	0.00345915	0.0500837	0.408073	0.980575	0.240265	0.198293	0.814747	0.43217	0.328005	0.314572	2.63e-06	0.64681	0.803198	0.850961	0.0884995	0.324011	0.97393	0.999985	0.154706	0.0922547	0.867675	0.863251	0.367722	0.938627	0.820682	0.971952	0.932117	0.381182	0.622372	0.158066	0.804803	0.767231	0.840121	0.861702	0.67074	0.465153	0.56896	0.267245	0.915718	0.675478	0.427344	0.568606	0.543617	0.51388	0.725375	0.63557	0.210333	0.0511567	0.11496
X2.ketoglucose.dimethylacetal.NIST	0.927835	0.106483	0.547782	0.0454993	0.993983	0.491151	0.114562	0.0205829	0.326376	0.90118	6.04e-10	0.256136	0.85465	0.989815	0.72427	0.901048	0.163374	0.0476332	0.168091	0.764871	0.124499	0.0525187	0.0336374	0.0443347	0.585279	0.776933	0.0163746	0.169767	0.439016	0.270878	0.464193	0.452612	0.0238564	0.505516	0.436949	0.535905	0.649254	0.181818	0.758474	0.983566	0.875427	0.178451	0.235868	0.456209	0.0201657	0.0521652	0.055521	0.428545	0.682148
X2.hydroxyglutaric.acid	0.217814	0.174999	0.169163	0.97586	0.410472	0.248361	0.09196	0.90096	0.573511	0.888701	0.00928805	0.32908	0.951011	0.835811	0.30166	0.792305	0.255419	0.120447	0.0394911	0.934146	0.0461013	0.440517	0.201213	0.96084	0.662333	0.823431	0.1504	0.67556	0.400227	0.129994	0.685396	0.563379	0.631201	0.0222884	0.141786	0.544945	0.600326	0.0982076	0.511375	0.541331	0.0159245	0.208387	0.362944	0.510765	0.239534	0.348261	0.967832	0.589782	0.593908
X299539	0.0132792	0.587727	0.77502	0.663395	0.655673	0.385063	0.831066	0.279322	0.98721	0.825222	2.13e-05	0.122796	0.749094	0.840224	0.502347	0.250336	0.586198	0.859533	0.519406	0.203742	0.0271371	0.274116	0.74141	0.292632	0.736772	0.492972	0.232918	0.85538	0.946976	0.650596	0.322971	0.181789	0.625484	0.0621307	0.18912	0.122008	0.133214	0.196378	0.955597	0.198488	0.506984	0.0627646	0.0968926	0.0774464	0.332089	0.124575	0.112917	0.794258	0.651946
X299532	0.0589628	0.960334	0.858755	0.93505	0.123989	0.0596782	0.885383	0.66357	0.447328	0.635841	0.711561	0.311785	0.275038	0.791913	0.129447	0.268278	0.941549	0.623572	0.982296	0.507984	0.650981	0.738897	0.212832	0.107246	0.376671	0.922507	0.408706	0.28286	0.816393	0.634153	0.820596	0.608942	0.698707	0.155878	0.808177	0.731235	0.848293	0.651199	0.549579	0.789562	0.497599	0.876853	0.563735	0.663642	0.374041	0.487173	0.0710041	0.380514	0.798422
X299531	0.691772	0.483952	0.612344	0.504093	0.16648	0.89561	0.96661	0.332378	0.160372	0.147152	0.0143513	0.224423	0.409821	0.489556	0.416699	0.689403	0.751782	0.479692	0.320751	0.111392	0.157052	0.263877	0.53193	0.896266	0.176054	0.433116	0.956818	0.818197	0.302449	0.985549	0.964071	0.883445	0.341193	0.198119	0.752148	0.763824	0.770068	0.596091	0.801701	0.56474	0.405449	0.806007	0.390442	0.505519	0.576015	0.600422	0.390343	0.132532	0.42185
X299526	0.00549073	0.38717	0.995218	0.732768	0.469318	0.472473	0.555049	0.675088	0.858431	0.6587	0.789663	0.381426	0.784556	0.955802	0.814673	0.749859	0.688404	0.852771	0.839001	0.892433	0.727779	0.0698237	0.0683278	0.963641	0.358209	0.371504	0.48206	0.870481	0.932534	0.83663	0.660172	0.101934	0.18896	0.45772	0.68587	0.962958	0.96482	0.480971	0.293014	0.852775	0.150498	0.650827	0.576907	0.877622	0.935078	0.746522	0.00224742	0.747535	0.970491
X299487	0.909906	0.0742166	0.672791	0.383145	0.0141705	0.774442	0.280579	0.0331518	0.240222	0.33902	0.55598	0.961266	0.170506	0.46859	0.54757	0.748888	0.669227	0.96809	0.721003	0.536121	0.412538	0.0264808	0.0410962	0.196192	0.773047	0.0659481	0.892206	0.136365	0.349518	0.168518	0.286014	0.432774	0.83302	0.861329	0.359932	0.856028	0.402262	0.163455	0.219569	0.680847	0.797002	0.24673	0.129468	0.0173453	0.203409	0.155043	0.136493	0.124614	0.678811
X299466	0.659012	0.733076	0.815048	0.537356	0.721314	0.520369	0.319431	0.745363	0.868916	0.484481	0.549558	0.971973	0.22073	0.471781	0.165256	0.984042	0.155926	0.905549	0.32599	0.357448	0.273436	0.194937	0.284841	0.890626	0.28725	0.392839	0.598599	0.33307	0.0601339	0.863397	0.49862	0.578435	0.872099	0.518415	0.559235	0.26127	0.450107	0.069047	0.703369	0.470698	0.734569	0.423754	0.182109	0.436083	0.527938	0.0935892	0.410109	0.590619	0.37033
X299448	0.0420294	0.298339	0.760516	0.565923	0.212815	0.505447	0.315433	0.974819	0.441443	0.582686	0.0251635	0.644891	0.450023	0.977938	0.436681	0.541017	0.716128	0.0143716	0.0660163	0.806811	0.0898455	0.887961	0.597275	0.333586	0.513331	0.936	0.158203	0.208897	0.0537681	0.0952514	0.584887	0.0644106	0.793995	0.992903	0.581752	0.807736	0.993368	0.480485	0.462366	0.32912	0.344988	0.664084	0.597085	0.337119	0.81292	0.192589	0.711441	0.84149	0.197333
X299441	0.0252709	0.637861	0.970269	0.281366	0.10641	0.576516	0.347709	0.316762	0.919115	0.737415	0.185521	0.481258	0.333453	0.907089	0.618237	0.948218	0.109025	0.117516	0.327416	0.836818	0.708172	0.786491	0.472902	0.233991	0.169899	0.738861	0.393813	0.0319121	0.0834647	0.799529	0.045844	0.919623	0.358148	0.453973	0.277379	0.297046	0.649645	0.143818	0.448338	0.572801	0.501496	0.397322	0.763518	0.925769	0.797809	0.640084	0.920005	0.404649	0.481187
X299436	0.115025	0.862667	0.469249	0.475188	0.619407	0.316245	0.740883	0.568966	0.804859	0.268715	0.963076	0.224021	0.672686	0.0970669	0.872446	0.354026	0.400343	0.731416	0.19276	0.0352846	0.85015	0.170075	0.235831	0.680934	0.0932965	0.308862	0.974432	0.817727	0.941239	0.605678	0.818624	0.00268531	0.0582721	0.984666	0.666705	0.702807	0.76625	0.394727	0.0549767	0.899821	0.493151	0.504465	0.936565	0.808665	0.239047	0.587587	0.545923	0.612646	0.160537
X299431	0.0853524	0.980185	0.835765	0.449115	0.854087	0.696694	0.372924	0.291948	0.895356	0.739803	0.478695	0.38239	0.921989	0.806268	0.0316354	0.0379132	0.869108	0.865113	0.948394	0.469076	0.040385	0.924439	0.882889	0.34394	0.265085	0.407813	0.265124	0.588469	0.144349	0.824883	0.211459	0.00501704	0.293491	0.975915	0.274081	0.063165	0.040115	0.312037	0.0329189	0.710377	0.175381	0.158098	0.0713281	0.0607809	0.452623	0.471789	0.27992	0.564068	0.154673
X299430	0.0773759	0.416351	0.496269	0.603962	0.335148	0.942098	0.900831	0.973249	0.955132	0.781663	0.21684	0.270269	0.767407	0.902094	0.587656	0.826416	0.919418	0.858381	0.766404	0.366926	0.451727	0.775315	0.627684	0.878411	0.809821	0.50923	0.276533	0.0820587	0.624913	0.769827	0.47374	0.790679	0.541662	0.315094	0.479877	0.596664	0.720819	0.892285	0.929366	0.856775	0.968537	0.496232	0.446421	0.664297	0.901964	0.339136	0.93009	0.883718	0.781665
X299427	0.0817498	0.701212	0.0739308	0.364125	0.117092	0.57976	0.458649	0.765685	0.598981	0.186851	1.64e-09	0.272854	0.337421	0.919306	0.722459	0.684485	0.421042	0.75561	0.626871	0.870637	0.481808	0.727439	0.445168	0.300279	0.356725	0.87644	0.891292	0.897899	0.738973	0.689719	0.517777	0.62322	0.706974	0.693398	0.464494	0.110385	0.260231	0.205819	0.118401	0.757779	0.933411	0.420056	0.0372449	0.0805273	0.447598	0.95089	0.499209	0.541744	0.165895
X299418	0.873282	0.694258	0.51585	0.0210275	0.631351	0.820622	0.778544	0.121465	0.703615	0.425648	2.89e-09	0.26003	0.440992	0.208255	0.28982	0.74531	0.447621	0.879276	0.603487	0.942997	0.66302	0.157434	0.516654	0.174986	0.759107	0.0484475	0.00746006	0.500833	0.676935	0.577405	0.0263787	0.36261	0.449911	0.346123	0.00296329	0.172895	0.00350656	0.415684	0.0773359	0.896446	0.349459	0.0228429	0.223996	0.0166467	0.638497	0.570411	0.80652	0.608874	0.908607
X299415	0.19912	0.639379	0.18884	0.37676	0.849769	0.061229	0.595003	0.791619	0.908293	0.753503	7.51e-08	0.914721	0.602881	0.250578	0.600223	0.0665642	0.523494	0.344939	0.209295	0.540888	0.963016	0.652838	0.297403	0.678133	0.0911317	0.412595	0.0110453	0.798382	0.697482	0.350929	0.744992	0.485334	0.711603	0.815797	0.107285	0.954925	0.510104	0.390984	0.787099	0.211047	0.867377	0.188481	0.920784	0.393145	0.741053	0.236611	0.882105	0.774639	0.476913
X299407	0.222656	0.0484993	0.921476	0.578838	0.67658	0.254431	0.761735	0.46921	0.815844	0.568051	0.131365	0.883673	0.851192	0.621984	0.143313	0.951901	0.998778	0.0613182	0.651129	0.535841	0.115184	0.00921247	0.0363302	0.988649	0.417932	0.980281	0.541494	0.384776	0.578735	0.0635201	0.58088	0.858757	0.274191	0.899729	0.197792	0.732315	0.341514	0.0264652	0.480298	0.0886547	0.890636	0.970114	0.567489	0.336727	0.0600913	0.272203	0.516319	0.25661	0.727525
X299158	0.00144299	0.647497	0.168175	0.421649	0.834527	0.633193	0.890766	0.912476	0.820058	0.81466	9.83e-13	0.00349534	0.409459	0.824395	0.527289	0.723357	0.794433	0.206513	0.0207653	0.4721	0.886844	0.183718	0.0789938	0.825831	0.90651	0.229271	0.816942	0.605353	0.550175	0.743067	0.692863	0.464658	0.146096	0.756843	0.512267	0.093734	0.146893	0.414691	0.450355	0.580086	0.180521	0.226467	0.110425	0.241181	0.453398	0.849498	0.471205	0.809804	0.258812
X298951	0.857882	0.275902	0.28827	0.808542	0.753138	0.727514	0.987792	0.0708423	0.193418	0.52676	0.000748634	0.86399	0.239447	0.968192	0.99673	0.729493	0.726707	0.94357	0.215334	0.0973058	0.408022	0.987589	0.618134	0.364042	0.756752	0.940797	0.965212	0.576905	0.575026	0.292924	0.86201	0.897085	0.411266	0.428242	0.967342	0.483656	0.66752	0.405789	0.736943	0.98746	0.741979	0.586561	0.752365	0.778871	0.10838	0.0462981	0.502674	0.970832	0.301543
X296133	0.00587987	0.0890174	0.00959333	0.0314593	0.720228	0.342127	0.950279	0.11008	0.194866	0.949722	0.319612	0.334983	0.977661	0.384512	0.498348	0.23187	0.925258	0.981001	0.11696	0.255607	0.909741	0.545905	0.771591	0.798323	0.630921	0.814648	0.581512	0.949435	0.726322	0.204698	0.0406353	0.410184	0.640786	0.705872	0.625175	0.15411	0.162088	0.42719	0.997531	0.542465	0.185949	0.9321	0.180801	0.326362	0.967444	0.120408	0.429187	0.307165	0.576725
X295269	0.776076	0.883905	0.987753	0.211788	0.220177	0.350491	0.977328	0.222985	0.655616	0.513455	0.00015942	0.762859	0.492568	0.503826	0.598328	0.545622	0.279103	0.0923671	0.11151	0.786215	0.799462	0.474534	0.446815	0.140638	0.339997	0.52364	0.113992	0.0646349	0.886777	0.938578	0.967784	0.663787	0.944112	0.757514	0.0985799	0.745112	0.582599	0.36844	0.233009	0.736724	0.911545	0.0428222	0.723798	0.554937	0.704291	0.601972	0.727645	0.790669	0.618446
X295226	0.730337	0.341717	0.476457	0.166315	0.0244909	0.0655151	0.649191	0.570088	0.94757	0.79434	0.0117092	0.320633	0.5365	0.745135	0.461392	0.587522	0.778017	0.896299	0.75742	0.913254	0.124464	0.0758754	0.53703	0.23313	0.923916	0.78914	0.637494	0.262528	0.700649	0.636284	0.320673	0.636941	0.628387	0.04904	0.855419	0.455006	0.472301	0.118603	0.860592	0.497307	0.326396	0.970105	0.370785	0.340573	0.743408	0.93663	0.346519	0.80118	0.226592
X295145	0.101198	0.119894	0.120737	0.0470971	0.431937	0.677308	0.628721	0.100695	0.486425	0.690315	1.03e-05	0.72624	0.236049	0.0539488	0.0735915	0.857778	0.292312	0.547638	0.158552	0.166765	0.0156146	0.488781	0.0850133	0.764998	0.88317	0.995131	0.542695	0.517815	0.594105	0.744668	0.076828	0.364668	0.122377	0.716489	0.993447	0.199241	0.23337	0.928562	0.0127318	0.653772	0.566281	0.581803	0.298728	0.282756	0.124234	0.166887	0.472678	0.399529	0.103565
X295067	0.0083753	0.240848	0.251693	0.918996	0.532685	0.134694	0.591103	0.720797	0.539145	0.758046	0.173179	0.212612	0.567449	0.249973	0.0341297	0.0530453	0.963119	0.829279	0.757771	0.714783	0.403872	0.354237	0.537377	0.367479	0.0686804	0.574106	0.66072	0.510281	0.0323231	0.105772	0.873486	0.438959	0.783855	0.253565	0.591278	0.907922	0.976456	0.645418	0.192978	0.420519	0.186137	0.521268	0.99249	0.598484	0.517552	0.988787	0.290677	0.42268	0.188116
X295066	0.294203	0.0841892	0.0147876	0.0685541	0.983763	0.175446	0.0188067	0.541283	0.779883	0.81855	0.609088	0.513338	0.151503	0.526589	0.568892	0.186265	0.417995	0.223588	0.76213	0.681806	0.853912	0.159262	0.0907815	0.620271	0.776844	0.30157	0.452848	0.773466	0.457061	0.988351	0.149381	0.162952	0.550181	0.0506221	0.58319	0.00755026	0.0998962	0.889431	0.786284	0.191729	0.0373938	0.71957	0.0121876	0.0313967	0.997694	0.93125	0.370002	0.868766	0.273148
X294509	0.716666	0.502489	0.0329235	0.0720748	0.248032	0.947503	0.624358	0.733993	0.935991	0.811925	0.854245	0.0372746	0.182645	0.341178	0.192363	0.318427	0.353533	0.630492	0.842097	0.921316	0.144795	0.0556959	0.0370407	0.670712	0.988739	0.224062	0.732649	0.468224	0.85912	0.118526	0.938218	0.973855	0.160226	0.0712772	0.67158	0.352028	0.265952	0.728531	0.950815	0.215803	0.562109	0.188245	0.774677	0.261385	0.719312	0.372822	0.389156	0.126096	0.767388
X294505	0.925749	0.0161501	0.0210127	0.691471	0.409765	0.389197	0.662548	0.676305	0.871862	0.875795	9.59e-17	0.207177	0.131623	0.439365	0.811709	0.947425	0.946499	0.999935	0.866337	0.397634	0.344863	0.655923	0.90159	0.0247806	0.687183	0.100469	0.879595	0.32972	0.390962	0.339074	0.896429	0.745114	0.317639	0.371261	0.965368	0.379505	0.612646	0.744418	0.912753	0.336425	0.0914937	0.535647	0.0723452	0.215288	0.0923307	0.943283	0.6892	0.545301	0.957831
X294504	0.1138	0.12273	0.385367	0.0828694	0.793632	0.536582	0.742061	0.337711	0.148379	0.841449	1.2e-33	0.0688986	0.0277765	0.162053	0.0201736	0.0861027	0.00740003	0.655736	0.854809	0.587915	0.487476	0.346048	0.354975	0.107789	0.0151738	0.143566	0.758591	0.807157	0.162267	0.644166	0.297665	0.28527	0.118282	0.332915	0.100216	0.421151	0.575493	0.257516	0.0107127	0.130972	0.0672926	0.384266	0.762711	0.991787	0.121383	0.889672	0.0413624	0.802238	0.402689
X294392	0.0138108	0.781022	0.070979	0.309853	0.943939	0.611587	0.367526	0.074878	0.0949241	0.407823	0.000379322	0.558602	0.888711	0.359588	0.593475	0.236244	0.380412	0.386184	0.878061	0.365442	0.703166	0.200184	0.525544	0.209812	0.482816	0.837344	0.0765657	0.879891	0.00838787	0.032269	0.0418368	0.277869	0.435808	0.402769	0.647488	0.375365	0.599497	0.444069	0.250738	0.0595992	0.460573	0.899734	0.639077	0.887944	0.171321	0.175656	0.451692	0.102418	0.170022
X291025	0.324568	0.00433995	0.114857	0.0606723	0.897811	0.513283	0.790143	0.164518	0.119973	0.592089	0.0127345	0.287691	0.275978	0.808939	0.631033	0.377447	0.175774	0.18506	0.300354	0.588865	0.786624	0.327969	0.159123	0.649236	0.810585	0.53522	0.449191	0.979912	0.338878	0.076556	0.234969	0.779825	0.15326	0.271655	0.00154325	0.0172257	0.216451	0.894679	0.918646	0.0411566	0.989607	0.00202847	0.0119518	0.283917	0.251019	0.927441	0.0508344	0.747231	0.305046
X289827	0.027633	0.0652545	0.796135	0.434747	0.608024	0.199472	0.280689	0.601205	0.998127	0.358089	1.77e-07	0.154494	0.354554	0.849226	0.473743	0.908328	0.260363	0.564422	0.487246	0.436429	0.13341	0.956274	0.0423711	0.777599	0.562348	0.210914	0.804374	0.900887	0.401683	0.942265	0.345227	0.27967	0.212445	0.615901	0.903905	0.31666	0.404026	0.816596	0.603016	0.345897	0.620065	0.859025	0.350229	0.375038	0.796037	0.770543	0.0492338	0.344674	0.821985
X288894	0.583463	0.112168	0.665232	0.684389	0.878793	0.986563	0.883115	0.88028	0.806284	0.686637	0.0185287	0.347307	0.142721	0.392878	0.412363	0.674395	0.967975	0.435188	0.116203	0.799795	0.491344	0.257248	0.927059	0.814215	0.332679	0.48043	0.459295	0.724736	0.837351	0.632219	0.958117	0.876019	0.457449	0.649545	0.868631	0.969768	0.905509	0.341664	0.154242	0.51569	0.355536	0.251211	0.514065	0.633614	0.832482	0.505707	0.858126	0.152606	0.691155
X288872	0.103998	0.37787	0.935836	0.740119	0.334179	0.608311	0.82114	0.12283	0.315904	0.603541	0.0628308	0.171896	0.26525	0.917266	0.0137936	0.0461142	0.112007	0.633969	0.42001	0.923722	0.188813	0.766522	0.0803443	0.308088	0.134436	0.134289	0.859327	0.766627	0.279983	0.733909	0.592079	0.724059	0.440405	0.353549	0.0794706	0.742443	0.742548	0.586161	0.602103	0.491679	0.112115	0.0267723	0.999607	0.888538	0.00606618	0.800188	0.14815	0.766864	0.45072
X288852	0.183988	0.664138	0.871929	0.210875	0.102937	0.34524	0.198517	0.597781	0.875799	0.817203	3.56e-16	0.164409	0.473521	0.805438	0.65609	0.887886	0.395631	0.996864	0.962704	0.728024	0.459188	0.933644	0.741815	0.547771	0.219281	0.204267	0.979656	0.647288	0.663183	0.574816	0.340096	0.73844	0.736521	0.576208	0.83516	0.463519	0.276789	0.268629	0.343744	0.598708	0.94753	0.339436	0.266618	0.2798	0.185121	0.776706	0.192858	0.107928	0.591621
X288810	0.220473	0.197315	0.719488	0.402431	0.909241	0.0587193	0.310506	0.71946	0.31245	0.173683	0.163912	0.240476	0.561744	0.911726	0.103861	0.918474	0.190426	0.621712	0.991178	0.851551	0.0461039	0.444274	0.397686	0.984581	0.873534	0.403265	0.810903	0.0468277	0.363147	0.226377	0.850024	0.551075	0.229308	0.823584	0.293412	0.500998	0.997745	0.74413	0.958386	0.665769	0.55818	0.988293	0.588515	0.489691	0.401396	0.934868	0.455915	0.160999	0.829369
X288375	0.320602	0.645559	0.795302	0.514794	0.671046	0.688997	0.186898	0.210292	0.219183	0.0890127	0.221797	0.829148	0.627741	0.83913	0.493283	0.243199	0.589557	0.838579	0.820305	0.804668	0.294323	0.795995	0.935295	0.980953	0.446156	0.00854185	0.464589	0.00293564	0.242284	0.991598	0.622792	0.00669277	0.11266	0.373728	0.491102	0.284439	0.267739	0.0599123	0.14577	0.95738	0.0431679	0.495698	0.214881	0.179681	0.41269	0.316288	0.729891	0.444893	0.411657
X287966	0.550735	0.155336	0.407897	0.380358	0.484235	0.987732	0.369736	0.5283	0.880069	0.516648	7.09e-07	0.151985	0.975143	0.173644	0.522859	0.491999	0.188177	0.261774	0.630676	0.851349	0.220963	0.169931	0.0343129	0.151933	0.801165	0.770708	0.973116	0.337832	0.197294	0.55053	0.205134	0.424029	0.475231	0.924784	0.0102088	0.235854	0.890435	0.48272	0.590569	0.205829	0.59772	0.0242375	0.539569	0.581701	0.902562	0.44572	0.879983	0.222027	0.966559
X287425	0.616638	0.293286	0.0984325	0.355177	0.438736	0.903306	0.471574	0.277102	0.116242	0.4475	2.17e-07	0.800175	0.185193	0.446758	0.0885255	0.0226318	0.0889945	0.813764	0.362318	0.686498	0.611162	0.829505	0.567558	0.375012	0.0544344	0.107643	0.40052	0.705337	0.473029	0.66006	0.624043	0.634447	0.878479	0.0583354	0.713168	0.518607	0.49693	0.885564	0.531841	0.333026	0.107652	0.281255	0.807929	0.99198	0.526014	0.0611111	0.0225326	0.376958	0.758361
X287419	0.801873	0.895255	0.145494	0.678379	0.792554	0.237668	0.324063	0.133918	0.474749	0.432756	2.35e-15	0.980617	0.0884612	0.241452	0.825846	0.602065	0.401494	0.817616	0.499216	0.17815	0.335988	0.0192943	0.055282	0.54814	0.384231	0.289711	0.853479	0.646364	0.854168	0.463578	0.270728	0.185103	0.439794	0.987987	0.94442	0.340357	0.349096	0.935451	0.0232016	0.278773	0.3739	0.686381	0.0788407	0.172962	0.379787	0.865867	0.548908	0.245822	0.0219826
X287414	0.845546	0.0675694	0.0824099	0.0688673	0.231987	0.45257	0.615315	0.534387	0.932161	0.376929	0.00909214	0.310154	0.939624	0.0502079	0.113157	0.76522	0.330145	0.864676	0.214852	0.514805	0.419838	0.0220832	0.0224033	0.203889	0.16077	0.289175	0.13337	0.995913	0.731719	0.900294	0.457817	0.17154	0.124041	0.718658	0.573686	0.820846	0.97105	0.285207	0.230087	0.0188849	0.257164	0.944147	0.754936	0.714137	0.877761	0.17175	0.636885	0.69056	0.875597
X286263	0.322823	0.11542	0.290743	0.343539	0.752607	0.475133	0.776958	0.600661	0.472457	0.280121	5.66e-06	0.647257	0.441176	0.34289	0.0903127	0.0225661	0.968748	0.400381	0.499427	0.169732	0.0933246	0.54826	0.576493	0.675056	0.682394	0.968601	0.739362	0.997413	0.241489	0.988874	0.130134	0.933449	0.648372	0.964454	0.00258619	0.249492	0.02761	0.768955	0.997929	0.461719	0.545367	0.0307437	0.0581818	0.00577169	0.828339	0.194174	0.599682	0.600249	0.0964664
X284386	0.532761	0.996622	0.340526	0.787506	0.423499	0.319102	0.442482	0.33537	0.144779	0.52326	5.81e-08	0.742107	0.70912	0.305679	0.957335	0.737757	0.322693	0.663692	0.896794	0.44535	0.555985	0.92499	0.955987	0.45285	0.861368	0.994383	0.615562	0.935102	0.276727	0.234896	0.744679	0.700863	0.53303	0.727304	0.953291	0.0943758	0.189567	0.165924	0.62778	0.408001	0.749514	0.627757	0.0534219	0.0833832	0.38668	0.827846	0.381594	0.837471	0.548605
X282690	0.604114	0.472781	0.76877	0.673627	0.727113	0.828759	0.889516	0.377285	0.367281	0.794758	2.27e-35	0.738132	0.49483	0.605174	0.318075	0.0128643	0.274863	0.855891	0.788181	0.751421	0.249837	0.556543	0.651203	0.505053	0.826003	0.755392	0.423664	0.517555	0.869352	0.103964	0.507964	0.464874	0.153431	0.654884	0.0222237	0.64552	0.225708	0.815888	0.247852	0.0495583	0.586866	0.193603	0.188651	0.0603837	0.566269	0.698008	0.791571	0.521842	0.402782
X281951	0.493376	0.41791	0.943716	0.498317	0.591275	0.449505	0.938016	0.341484	0.322221	0.902915	0.174253	0.891577	0.971773	0.952922	0.336156	0.829185	0.723745	0.0751365	0.100565	0.554362	0.263074	0.313418	0.414082	0.410095	0.0197985	0.0376333	0.0945432	0.179167	0.654591	0.955749	0.421131	0.7184	0.690365	0.108285	0.055852	0.787588	0.281582	0.310679	0.771182	0.787075	0.141953	0.126561	0.730826	0.431881	0.527637	0.727097	0.887788	0.304643	0.90539
X281575	0.186088	0.0403769	0.485439	0.425304	0.734343	0.157079	0.612838	0.941275	0.776992	0.934639	0.203769	0.628302	0.414585	0.665962	0.961188	0.228111	0.745112	0.814658	0.969231	0.947051	0.93632	0.278665	0.235969	0.233393	0.557617	0.117922	0.935341	0.742112	0.241317	0.197296	0.4123	0.464691	0.0403711	0.0203154	0.237956	0.445519	0.788571	0.581244	0.610071	0.520829	0.00245494	0.104474	0.381969	0.830845	0.0971687	0.349019	0.814684	0.409793	0.168098
X281189	0.115431	0.482033	0.60607	0.425677	0.790309	0.628497	0.309973	0.0669467	0.300267	0.51149	0.451719	0.0982817	0.654295	0.120122	0.047311	0.948473	0.861699	0.285077	0.276222	0.399932	0.2863	0.574986	0.426868	0.377372	0.086001	0.711844	0.358751	0.309592	0.24343	0.79724	0.825204	0.635626	0.473098	0.670005	0.979433	0.839826	0.917388	0.942489	0.490335	0.63102	0.408074	0.874456	0.300294	0.37783	0.296842	0.242036	0.744255	0.566183	0.62146
X281147	0.211216	0.868154	0.179892	0.213997	0.970002	0.901333	0.707402	0.428434	0.0135546	0.0129611	0.975761	0.851213	0.584302	0.593291	0.271059	0.133658	0.366048	0.0986971	0.58791	0.582257	0.160577	0.407774	0.226911	0.917762	0.631128	0.281972	0.479973	0.902668	0.194626	0.365789	0.0957344	0.654847	0.409595	0.221818	0.489621	0.923404	0.82509	0.0657181	0.508326	0.987774	0.0266768	0.129794	0.477691	0.99383	0.199889	0.678089	0.912441	0.190543	0.757074
X280940	0.566607	0.0352764	0.564624	0.595155	0.5955	0.338222	0.453742	0.768025	0.667777	0.553754	0.00698628	0.896191	0.451859	0.325565	0.252572	0.976102	0.246873	0.0632862	0.683892	0.744148	0.913475	0.871224	0.43674	0.610648	0.476193	0.381541	0.629542	0.411795	0.108204	0.892741	0.263407	0.314088	0.725455	0.778647	0.850328	0.959382	0.97902	0.448869	0.788509	0.306687	0.278162	0.284622	0.848082	0.93379	0.770977	0.924377	0.899132	0.374301	0.209339
X280737	0.210901	0.565483	0.534412	0.862176	0.416853	0.266684	0.657213	0.216115	0.404178	0.463081	0.0309889	0.721628	0.958208	0.0855092	0.216824	0.933236	0.663655	0.240425	0.238472	0.138909	0.697734	0.88504	0.984967	0.214974	0.162104	0.81953	0.979564	0.757454	0.772	0.593867	0.4783	0.314585	0.789651	0.694959	0.72031	0.974119	0.62896	0.457135	0.421964	0.145608	0.675407	0.366404	0.878191	0.541069	0.847654	0.470194	0.914289	0.815849	0.137261
X280727	0.0658649	0.92691	0.783327	0.89041	0.614001	0.434922	0.300492	0.884399	0.420604	0.495235	8.61e-20	0.187071	0.0562216	0.121727	0.603554	0.486217	0.221247	0.736594	0.345276	0.438088	0.690359	0.923447	0.56543	0.0890069	0.357255	0.0257672	0.400866	0.551229	0.296083	0.872134	0.155397	0.391059	0.149807	0.420775	0.0130481	0.0639287	0.501163	0.287975	0.0780418	0.885097	0.532024	0.190005	0.0872889	0.328234	0.850594	0.978024	0.569013	0.517937	0.0544446
X280722	0.862701	0.235178	0.54962	0.799265	0.727315	0.408902	0.635012	0.0447507	0.383663	0.0496148	1.17e-05	0.912025	0.662562	0.631483	0.0627274	0.897099	0.660746	0.702652	0.290016	0.219199	0.994294	0.310454	0.26534	0.358495	0.452151	0.34331	0.640809	0.496552	0.928525	0.430933	0.416196	0.810803	0.645323	0.272673	0.223314	0.231004	0.0587471	0.282596	0.0448429	0.677645	0.330011	0.565009	0.0582322	0.0383087	0.803073	0.993613	0.406202	0.199559	0.0152197
X280712	0.998525	0.513019	0.14186	0.959856	0.119468	0.84365	0.866222	0.779369	0.361594	0.507514	0.0128645	0.373651	0.437787	0.991464	0.694071	0.929783	0.764846	0.987452	0.153199	0.443247	0.115253	0.729356	0.240365	0.484956	0.090877	0.0163289	0.140051	0.607348	0.62538	0.782231	0.558533	0.959675	0.603913	0.354404	0.625556	0.102821	0.13218	0.880271	0.962682	0.980907	0.645125	0.702236	0.225664	0.320677	0.0684684	0.0467726	0.592252	0.460212	0.86283
X280684	0.687689	0.135427	0.313825	0.585017	0.16623	0.505662	0.889543	0.236209	0.328961	0.557477	0.151267	0.640809	0.646107	0.282436	0.417981	0.437366	0.811262	0.564701	0.971575	0.587685	0.333167	0.315463	0.305874	0.781184	0.52578	0.244312	0.19881	0.416442	0.239151	0.014146	0.838895	0.487465	0.802364	0.701697	0.0662544	0.400638	0.979277	0.368295	0.622928	0.810736	0.802543	0.112429	0.092118	0.466745	0.461581	0.570115	0.860751	0.937537	0.724198
X280647	0.743192	0.560804	0.889128	0.660075	0.673315	0.0702578	0.800161	0.737012	0.704102	0.962301	0.173287	0.179003	0.475006	0.247911	0.0583468	0.148077	0.0855787	0.646805	0.800875	0.734522	0.541331	0.685837	0.766742	0.0984901	0.374782	0.288734	0.486447	0.72353	0.749219	0.143328	0.802534	0.58557	0.276202	0.493199	0.0939739	0.206615	0.390399	0.260427	0.902246	0.800014	0.276414	0.237755	0.250778	0.807282	0.446217	0.304816	0.793629	0.0227518	0.0908685
X280606	0.266471	0.0078452	0.502514	0.0870018	0.698682	0.0396128	0.0441597	0.670951	0.0964095	0.561903	0.0129938	0.441078	0.532031	0.723336	0.870785	0.244576	0.263411	0.0358058	0.0505218	0.22554	0.0901155	0.0190036	0.0961116	0.768314	0.272119	0.0736431	0.732574	0.965739	0.382162	0.349441	0.805887	0.859449	0.199913	0.689916	0.845136	0.740963	0.817646	0.974173	0.831464	0.359066	0.707766	0.835157	0.496001	0.198533	0.194267	0.17766	0.88179	0.203534	0.0384614
X280602	0.310125	0.603227	0.767527	0.882416	0.611834	0.358513	0.648757	0.441455	0.77982	0.5928	0.320231	0.744278	0.709332	0.214695	0.696298	0.146116	0.600153	0.535389	0.870999	0.54545	0.830322	0.860428	0.68305	0.681758	0.647668	0.245361	0.750869	0.332027	0.985965	0.648961	0.899737	0.471916	0.690887	0.166308	0.164581	0.0949436	0.17615	0.738555	0.475872	0.659398	0.667116	0.0513124	0.0761056	0.196766	0.395095	0.381174	0.525385	0.805695	0.0507855
X280539	0.166568	0.718729	0.349675	0.316463	0.423745	0.0301166	0.914716	0.170898	0.460417	0.811855	0.0071993	0.244493	0.66841	0.0922985	0.0814195	0.243268	0.670238	0.201795	0.255413	0.932671	0.460123	0.89426	0.990048	0.933783	0.634911	0.775997	0.320929	0.503668	0.432106	0.0153795	0.419639	0.342704	0.225144	0.962714	0.0780476	0.83082	0.394019	0.37061	0.363955	0.248883	0.512777	0.0483218	0.883524	0.509384	0.510735	0.390044	0.894494	0.158551	0.862705
X280537	0.540417	0.743324	0.333414	0.321979	0.962413	0.314908	0.13968	0.590938	0.934849	0.248637	0.1168	0.830797	0.420688	0.182864	0.73376	0.687831	0.665711	0.945988	0.176043	0.10103	0.92227	0.137431	0.0828527	0.101697	0.53464	0.397014	0.409584	0.676175	0.544421	0.817474	0.97286	0.781401	0.706591	0.593395	0.451219	0.722212	0.947547	0.0244316	0.573711	0.643331	0.574594	0.471961	0.776587	0.658955	0.000126034	0.119802	0.325997	0.167224	0.000589715
X280051	0.0125387	0.0112858	0.260126	0.240434	0.99023	0.0343135	0.291905	0.350439	0.647142	0.811279	5.27e-09	0.0539112	0.207084	0.395671	0.284298	0.180608	0.369028	0.620511	0.65534	0.976614	0.92724	0.979752	0.391786	0.00320405	0.260865	0.791889	0.280749	0.545262	0.131095	0.885526	0.0487568	0.847171	0.882152	0.999649	0.53344	0.0435675	0.200211	0.950452	0.0306846	0.129931	0.557426	0.664598	0.146704	0.205552	0.23212	0.311551	0.804378	0.408291	0.31651
X277188	0.0650666	0.855951	0.596295	0.688407	0.95652	0.803129	0.614657	0.622844	0.0805149	0.212731	0.808304	0.741059	0.278145	0.292316	0.946726	0.243371	0.23954	0.44839	0.470676	0.368403	0.482405	0.261188	0.602145	0.338154	0.149409	0.236352	0.536888	0.707245	0.310503	0.93737	0.238305	0.976275	0.257842	0.459794	0.0314399	0.969985	0.415645	0.779441	0.954361	0.774014	0.234541	0.0397709	0.42776	0.991324	0.556617	0.245101	0.0628316	0.19403	0.640995
X276947	0.205899	0.153169	0.275685	0.00686856	0.0746559	0.099964	0.788354	0.591284	0.466952	0.354095	5.46e-12	0.871407	0.359202	0.544985	0.745722	0.932586	0.351184	0.618594	0.920495	0.760163	0.441471	0.966626	0.785977	0.132282	0.308213	0.865817	0.586052	0.560284	0.134847	0.350346	0.183161	0.236776	0.679136	0.0379116	0.224152	0.397249	0.0816924	0.319718	0.695217	0.193279	0.0491695	0.0404748	0.397458	0.148108	0.961212	0.379203	0.608687	0.652325	0.840693
X275608	0.362997	0.346831	0.989161	0.184601	0.294909	0.870888	0.413843	0.676855	0.812729	0.652177	0.00660601	0.853695	0.671453	0.72787	0.280653	0.32863	0.626071	0.376612	0.342732	0.680098	0.490225	0.634015	0.0376916	0.534327	0.111256	0.733532	0.94516	0.748222	0.674906	0.783938	0.60889	0.376274	0.832029	0.643801	0.922768	0.580862	0.21537	0.0750133	0.559024	0.215117	0.0635796	0.641463	0.312381	0.232708	0.133293	0.533127	0.087571	0.978479	0.420003
X273985	0.984028	0.526514	0.460567	0.705696	0.322404	0.886624	0.410631	0.904944	0.233252	0.0681532	0.000549171	0.0718613	0.226078	0.59942	0.192773	0.349932	0.487503	0.635805	0.475629	0.160188	0.136939	0.237956	0.902536	0.860976	0.778311	0.299422	0.252153	0.00937134	0.258722	0.00464413	0.572781	0.0855234	0.782316	0.672117	0.783382	0.745284	0.724776	0.356303	0.311866	0.88969	0.952596	0.862032	0.996417	0.829129	0.0601101	0.167868	0.858035	0.205223	0.217091
X273984	0.151703	0.306569	0.842934	0.981913	0.565205	0.910748	0.455102	0.132862	0.832841	0.380157	0.897306	0.414473	0.35366	0.509326	0.0107064	0.113153	0.56595	0.472113	0.715766	0.799114	0.0410994	0.953211	0.906225	0.444873	0.409026	0.966846	0.319233	0.714447	0.88024	0.781269	0.585571	0.276133	0.481534	0.633564	0.758361	0.836982	0.956076	0.905004	0.156896	0.534896	0.798591	0.746769	0.617821	0.589549	0.527594	0.50678	0.613002	0.491222	0.419337
X273944	0.348531	0.90835	0.602454	0.110757	0.276637	0.401902	0.316453	0.272	0.847639	0.988062	0.0287281	0.312922	0.0253921	0.135884	0.169693	0.800557	0.912529	0.998851	0.521216	0.331488	0.540485	0.657781	0.39537	0.387805	0.953373	0.953152	0.402361	0.629042	0.932559	0.0509568	0.631186	0.324324	0.0273724	0.0330672	0.319864	0.00636785	0.0184689	0.652297	0.0120037	0.00816486	0.0159529	0.435457	0.00965707	0.0168028	0.753961	0.181993	0.970079	0.361658	0.499512
X273619	0.0290386	0.82795	0.972766	0.00856747	0.480007	0.0410706	0.43626	0.555157	0.375762	0.61522	2.35e-19	0.10449	0.168707	0.589061	0.783009	0.986528	0.671186	0.495971	0.572978	0.947038	0.115012	0.0996466	0.83547	0.454717	0.240546	0.549801	0.644343	0.939212	0.464352	0.768693	0.133902	0.686283	0.388359	0.272981	0.699164	0.575447	0.839099	0.056174	0.0688422	0.303088	0.105118	0.880049	0.457075	0.782099	0.528484	0.255738	0.80958	0.808602	0.464778
X273598	0.0502804	0.506346	0.159789	0.618796	0.0375374	0.833593	0.358311	0.00021	0.75938	0.38826	1.31e-22	0.164858	0.168139	0.203827	0.0981447	0.691848	0.000813674	0.0941664	0.0473486	0.766482	0.463947	0.451789	0.754631	0.391336	0.0527806	0.241238	0.81163	0.38552	0.0770051	0.216866	0.524028	0.62524	0.389288	0.395095	0.125366	0.707911	0.418357	0.02097	0.0044632	0.0224878	0.0495884	0.121094	0.894264	0.772306	0.25292	0.910527	0.306107	0.525754	0.0616971
X273447	0.15111	0.396431	0.308351	0.104406	0.192612	0.0462083	0.604454	0.500041	0.597236	0.939343	0.167649	0.135258	0.878679	0.29256	0.15141	0.197813	0.429466	0.106627	0.876343	0.0767305	0.483488	0.50869	0.467667	0.723882	0.220763	0.0915304	0.631383	0.184383	0.0248398	0.243247	0.194609	0.823874	0.162655	0.920033	0.80141	0.0262769	0.0287973	0.210297	0.350104	0.840161	0.879994	0.556868	0.126232	0.210603	0.0944854	0.292781	0.392517	0.551736	0.171411
X273236	0.565659	0.698009	0.0121358	0.0120799	0.405832	0.0337643	0.608025	0.0459793	0.342751	0.0870756	0.967264	0.573902	0.899923	0.411338	0.767637	0.979229	0.296516	0.866749	0.149987	0.168008	0.326443	0.335055	0.0734078	0.406615	0.665441	0.235733	0.865294	0.669868	0.736865	0.542345	0.12976	0.102778	0.011011	0.193063	0.433755	0.379559	0.483856	0.665918	0.243849	0.00813301	0.344735	0.695366	0.655761	0.331916	0.133111	0.898731	0.584066	0.389787	0.570964
X272849	0.389699	0.188623	0.847599	0.688652	0.400216	0.5336	0.316375	0.978939	0.725358	0.989927	2.4e-05	0.172805	0.684561	0.837857	0.201093	0.474071	0.72849	0.194118	0.136129	0.335882	0.765084	0.101893	0.214624	0.722831	0.97754	0.977739	0.764106	0.11143	0.45121	0.344476	0.69909	0.398625	0.56302	0.200199	0.221432	0.479514	0.294452	0.253371	0.49274	0.591098	0.481274	0.0986862	0.707647	0.269644	0.74186	0.38571	0.141516	0.480911	0.308876
X272698	0.796367	0.781272	0.987623	0.0393587	0.351237	0.00915522	0.722707	0.408439	0.434584	0.470768	9.49e-06	0.536475	0.37467	0.780378	0.274739	0.677073	0.421337	0.954971	0.452252	0.340607	0.488695	0.696583	0.816127	0.27885	0.449213	0.103312	0.0622269	0.179188	0.0387183	0.167451	0.752198	0.104303	0.682375	0.691759	0.0581279	0.97782	0.262824	0.819497	0.0127219	0.804618	0.705158	0.126884	0.594148	0.21027	0.792151	0.852903	0.384911	0.374465	0.649674
X272306	0.0283286	0.408278	0.509136	0.437059	0.21811	0.509733	0.8108	0.882848	0.286203	0.677461	0.283749	0.40328	0.727451	0.471692	0.149845	0.823191	0.775018	0.641175	0.210524	0.255932	0.427316	0.329381	0.925567	0.984144	0.323221	0.808695	0.974767	0.240539	0.0903794	0.913229	0.533796	0.353185	0.290131	0.477302	0.419558	0.324691	0.0476974	0.090698	0.663039	0.324573	0.231044	0.178843	0.463503	0.0854084	0.437445	0.323496	0.335924	0.733809	0.530179
X271426	0.759706	0.0612161	0.164811	0.761168	0.444743	0.495499	0.246472	0.106702	0.965329	0.786906	0.170068	0.349548	0.865146	0.284444	0.475508	0.665843	0.753202	0.398573	0.355858	0.498393	0.623572	0.129306	0.883123	0.873796	0.363841	0.905651	0.65704	0.592431	0.572878	0.665013	0.793285	0.786387	0.803246	0.968167	0.61632	0.677674	0.710407	0.553421	0.775114	0.639977	0.916512	0.976164	0.704566	0.581428	0.696221	0.401191	0.930448	0.591294	0.811243
X271416	0.567461	0.529589	0.621541	0.193113	0.0768363	0.476886	0.208702	0.776868	0.310679	0.199973	2.24e-08	0.899634	0.886211	0.357383	0.215074	0.153985	0.0669789	0.739585	0.976017	0.442407	0.291681	0.12433	0.0643036	0.981427	0.908192	0.179551	0.449888	0.589119	0.755702	0.226347	0.051296	0.345837	0.322756	0.406331	0.360481	0.89068	0.454726	0.304853	0.850531	0.58963	0.491324	0.197362	0.621068	0.328664	0.424839	0.405196	0.677918	0.562427	0.4251
X271121	0.685116	0.607552	0.0364492	0.038035	0.48686	0.545449	0.427216	0.322568	0.109259	0.128759	0.520597	0.348146	0.287345	0.776847	0.659943	0.0945392	0.342261	0.666746	0.363299	0.0908099	0.56744	0.231579	0.688845	0.44086	0.404527	0.736245	0.19164	0.389264	0.813522	0.567431	0.79097	0.273213	0.0837791	0.540442	0.826169	0.979314	0.949446	0.003448	0.72939	0.461501	0.941068	0.311865	0.445303	0.645448	0.0547511	0.348947	0.874155	0.456571	0.0166433
X271050	0.639059	0.00999975	0.956189	0.783729	0.144203	0.965462	0.476469	0.0510703	0.0245254	0.130198	8.03e-35	0.356687	0.994786	0.901128	0.887959	0.849879	0.30312	0.0477587	0.429672	0.658584	0.244516	0.0091605	0.734849	0.752948	0.563044	0.29139	0.518834	0.255075	0.457733	0.687046	0.838736	0.686783	0.372954	0.912238	0.375518	0.585292	0.245261	0.012199	0.536326	0.447108	0.697991	0.968337	0.342741	0.410533	0.00851868	0.292781	0.933265	0.36865	0.761108
X270547	0.0658361	0.240737	0.187821	0.312771	0.963164	0.0843181	0.861176	0.666183	0.525299	0.484115	0.130029	0.403524	0.804795	0.708634	0.298292	0.279247	0.224858	0.810129	0.664854	0.741282	0.30517	0.476998	0.747005	0.154342	0.353095	0.756035	0.246159	0.123274	0.048303	0.000392983	0.13321	0.299983	0.97756	0.132414	0.59629	0.282965	0.19737	0.787677	0.0385989	0.614941	0.0359804	0.675557	0.764509	0.618843	0.177908	0.462465	0.74271	0.279775	0.274786
X270409	0.950874	0.836041	0.781228	0.0931267	0.66452	0.731412	0.88805	0.0608284	0.198153	0.149068	3.38e-06	0.688599	0.610281	0.186926	0.241882	0.0506849	0.477137	0.00879312	0.111356	0.833176	0.694389	0.372351	0.332251	0.353058	0.298627	0.65783	0.625512	0.388019	0.075033	0.147128	0.576687	0.183724	0.232858	0.951795	0.788343	0.392122	0.563172	0.928825	0.666363	0.899486	0.460686	0.581661	0.408171	0.786481	0.213122	0.414375	0.203814	0.281238	0.50621
X270249	0.967235	0.878919	0.88958	0.0473915	0.496436	0.085426	0.0242634	0.159534	0.599305	0.722265	0.000178194	0.305357	0.917833	0.860041	0.179258	0.548715	0.0477123	0.853162	0.00422193	0.000956933	0.14184	0.0738802	0.231873	0.269532	0.0893449	0.0556324	0.809638	0.575397	0.216219	0.633277	0.307858	0.190767	0.176614	0.721364	0.376058	0.332834	0.0706537	0.79385	0.494097	0.130807	0.88586	0.441079	0.483024	0.325861	0.641	0.188549	0.992366	0.616588	0.422959
X270207	0.524404	0.862848	0.807757	0.240826	0.844094	0.521861	0.00329818	0.434806	0.404878	0.411923	6.25e-05	0.702992	0.258725	0.882215	0.357042	0.363521	0.0874342	0.66119	0.00823856	0.00554545	0.0429246	0.26506	0.638118	0.786283	0.185875	0.325256	0.782201	0.627104	0.443433	0.811666	0.619503	0.356507	0.591208	0.578879	0.990469	0.198723	0.118557	0.881549	0.409387	0.68141	0.645719	0.967117	0.424842	0.48005	0.410799	0.141567	0.842401	0.747781	0.512859
X270185	0.158887	0.0970666	0.523463	0.722027	0.20058	0.979261	0.520474	0.69339	0.464273	0.652652	2.42e-11	0.540646	0.300322	0.199274	0.281079	0.595603	0.519557	0.778096	0.947804	0.670099	0.414442	0.564154	0.531806	0.976191	0.282135	0.772002	0.622807	0.852832	0.671622	0.819895	0.498774	0.502154	0.585713	0.974608	0.410113	0.830826	0.628816	0.61409	0.281174	0.876194	0.202532	0.704374	0.926017	0.74346	0.691508	0.072977	0.764103	0.576717	0.126062
X270086	0.432259	0.0525264	0.725033	0.395119	0.955252	0.407102	0.218402	0.168471	0.248875	0.893259	0.0196003	0.791121	0.590536	0.992984	0.752143	0.872079	0.735238	0.224511	0.957796	0.554636	0.0263773	0.0373574	0.265047	0.508671	0.431589	0.716222	0.701492	0.462798	0.875555	0.394467	0.375523	0.840742	0.875877	0.448277	0.426973	0.7381	0.602706	0.0103967	0.772176	0.628062	0.570962	0.151548	0.816615	0.503115	0.455043	0.330098	0.604841	0.0572927	0.886015
X269987	0.0183147	0.0273298	0.750069	0.119406	0.202343	0.824509	0.841256	0.205116	0.75968	0.442851	1.36e-33	0.0685507	0.672823	0.309893	0.113669	0.867093	0.277255	0.663867	0.692949	0.924919	0.978417	0.279524	0.516171	0.929522	0.684728	0.412314	0.7168	0.932148	0.485017	0.585201	0.773217	0.863528	0.845591	0.953611	0.542033	0.903501	0.797217	0.641385	0.237258	0.038699	0.358167	0.322289	0.763636	0.931485	0.571819	0.707533	0.328945	0.296819	0.302307
X269984	0.771582	0.239589	0.818989	0.945656	0.506273	0.969443	0.110365	0.68282	0.966257	0.971532	0.790688	0.0569702	0.872293	0.941882	0.434896	0.521524	0.880325	0.495677	0.133558	0.372812	0.344967	0.807973	0.768649	0.0853308	0.83541	0.319663	0.401889	0.815997	0.72912	0.725943	0.0916252	0.888108	0.473491	0.134579	0.0578518	0.00351637	0.0720595	0.789038	0.459983	0.863057	0.202059	0.0408688	0.00683518	0.0963061	0.385445	0.361859	0.740645	0.85867	0.625187
X269331	0.45019	0.0234077	0.257351	0.634623	0.0191329	0.387877	0.226133	0.00905372	0.0768472	0.411207	0.00598564	0.522713	0.997689	0.564518	0.299539	0.147486	0.126029	0.776044	0.890437	0.46894	0.493442	0.846308	0.550356	0.559212	0.593507	0.0647795	0.00335313	0.283149	0.334997	0.213543	0.549512	0.878669	0.537226	0.66504	0.691975	0.329763	0.215661	0.50981	0.644995	0.666898	0.523642	0.851635	0.488066	0.334397	0.411413	0.621572	0.169408	0.651007	0.55964
X269178	0.552126	0.641273	0.780624	0.719118	0.134385	0.186848	0.730595	0.324739	0.705919	0.563076	2.15e-06	0.831474	0.79602	0.873877	0.231881	0.337322	0.093717	0.953284	0.400675	0.587788	0.464926	0.355188	0.79268	0.761058	0.945578	0.438845	0.771052	0.0260109	0.0614997	0.976243	0.672349	0.167172	0.334767	0.225906	0.215067	0.35999	0.310036	0.888237	0.476732	0.552799	0.464758	0.691905	0.13848	0.276104	0.463587	0.13337	0.114064	0.809326	0.676133
X269160	0.61172	0.892554	0.381959	0.815776	0.196675	0.545718	0.793089	0.279654	0.62091	0.669158	0.00169884	0.328124	0.545238	0.714721	0.103953	0.0732755	0.756221	0.407976	0.654714	0.168959	0.093727	0.523503	0.851961	0.505766	0.502623	0.508847	0.821762	0.795398	0.687355	0.7811	0.596218	0.462296	0.859023	0.635105	0.592237	0.978562	0.81208	0.258355	0.985523	0.272701	0.869838	0.347998	0.375973	0.471868	0.513048	0.0721085	0.574363	0.556036	0.468015
X269146	0.766603	0.0135164	0.0968381	0.395527	0.786332	0.405988	0.509254	0.711913	0.442458	0.241715	0.951995	0.654724	0.587126	0.933572	0.560595	0.867352	0.590523	0.161428	0.233314	0.502643	0.560417	0.047233	0.0555217	0.669855	0.830385	0.2994	0.663082	0.736258	0.396075	0.732156	0.442172	0.643927	0.750978	0.0574639	0.804916	0.753941	0.736171	0.174511	0.468822	0.430693	0.056214	0.370521	0.481765	0.885705	0.425316	0.953716	0.708142	0.368705	0.405789
X268643	0.220747	0.422195	0.349455	0.422117	0.305486	0.916367	0.100944	0.797106	0.74136	0.669511	0.230123	0.37167	0.944785	0.604593	0.76963	0.564187	0.594348	0.980823	0.869473	0.556096	0.0106502	0.0925157	0.443935	0.227766	0.336437	0.479392	0.2272	0.945202	0.429848	0.104365	0.312576	0.581347	0.942553	0.308731	0.0778893	0.607194	0.591195	0.299539	0.0731114	0.754675	0.150198	0.198381	0.835421	0.793738	0.951795	0.632661	0.975538	0.166554	0.196036
X268610	0.394706	0.106577	0.20026	0.518643	0.733846	0.593071	0.00184258	0.166813	0.923351	0.795008	7.97e-06	0.65544	0.990971	0.502137	0.595741	0.596915	0.285905	0.226772	0.457559	0.851188	0.942328	0.199365	0.697728	0.973068	0.628398	0.468613	0.172468	0.444717	0.824301	0.164809	0.402927	0.885595	0.703805	0.685657	0.122876	0.977941	0.350717	0.810432	0.0217589	0.161781	0.676895	0.0629068	0.684756	0.471945	0.961741	0.663494	0.560691	0.392614	0.465775
X268565	0.000934947	0.163442	0.874311	0.581975	0.276389	0.335058	0.0285761	0.954892	0.999707	0.681262	0.407858	0.377583	0.652897	0.0792224	0.79563	0.384315	0.844684	0.392465	0.342231	0.573439	0.430758	0.700085	0.13654	0.416722	0.598534	0.888831	0.250793	0.535067	0.53802	0.125077	0.41793	0.531	0.671087	0.559747	0.78201	0.0149413	0.0335446	0.702706	0.365808	0.920228	0.348902	0.838653	0.0150091	0.0750769	0.911585	0.484456	0.272246	0.495293	0.235215
X268533	0.485874	0.935406	0.782859	0.720866	0.729232	0.484866	0.822616	0.648016	0.592994	0.142881	0.30306	0.428977	0.639616	0.80634	0.35632	0.690766	0.172434	0.341386	0.933978	0.922931	0.553384	0.506317	0.674019	0.808792	0.119567	0.45941	0.545096	0.869687	0.162323	0.262052	0.26892	0.971076	0.339274	0.7578	0.767389	0.369022	0.593247	0.0438808	0.147391	0.663066	0.796817	0.47765	0.342963	0.614156	0.136009	0.783463	0.71792	0.204555	0.976985
X268454	0.021979	0.0929709	0.872657	0.625652	0.240787	0.595443	0.479851	0.884937	0.536979	0.377288	1.1e-12	0.282558	0.773866	0.998808	0.667712	0.200324	0.85472	0.540724	0.913115	0.953313	0.946665	0.552505	0.717336	0.263212	0.386608	0.246389	0.122937	0.669546	0.463557	0.440981	0.694219	0.338295	0.614629	0.940669	0.0126362	0.734677	0.391998	0.0755443	0.606816	0.727341	0.890475	0.0604093	0.850728	0.656961	0.0472282	0.0151933	0.0761044	0.00717867	0.10254
X268448	0.0049507	0.0982973	0.418483	0.31863	0.619077	0.677722	0.51075	0.33777	0.565571	0.404687	3.22e-11	0.706148	0.450654	0.133409	0.00837055	0.46815	0.147167	0.646161	0.246337	0.0847055	0.00490326	0.986523	0.915999	0.579267	0.474199	0.405854	0.241747	0.644908	0.343306	0.207917	0.454029	0.023837	0.231394	0.167347	0.16633	0.705371	0.816237	0.559929	0.00674269	0.0204596	0.256327	0.0954439	0.816092	0.921176	0.29632	0.12671	0.342629	0.807815	0.399189
X268445	0.416031	0.174004	0.622851	0.882955	0.744527	0.729382	0.428174	0.15838	0.276669	0.836858	1.27e-05	0.20943	0.265103	0.859946	0.624644	0.903112	0.0455685	0.357231	0.707457	0.860975	0.203559	0.397595	0.700702	0.676723	0.30212	0.178547	0.596801	0.539411	0.462314	0.355913	0.921769	0.965592	0.140633	0.850816	0.550239	0.112567	0.0492595	0.047254	0.0966815	0.500361	0.104916	0.948471	0.0627311	0.0377847	0.465164	0.0675268	0.842587	0.669724	0.308857
X268438	0.562339	0.0761071	0.649035	0.598094	0.742254	0.346482	0.0233422	9.46e-05	0.0285961	0.714532	5.63e-07	0.584476	0.364722	0.414183	0.192637	0.393369	0.842991	0.360392	0.304389	0.373407	0.514622	0.833752	0.515467	0.132723	0.221496	0.611459	0.94496	0.671446	0.634539	0.142746	0.52102	0.107094	0.941479	0.364486	0.301364	0.772761	0.391162	0.576179	0.828713	0.67241	0.566842	0.240099	0.718007	0.976261	0.955218	0.124108	0.252081	0.745964	0.855848
X268437	0.632202	0.604962	0.404699	0.457479	0.858184	0.439155	0.482094	0.502366	0.749541	0.354533	0.00035461	0.202066	0.88626	0.908672	0.665738	0.885414	0.974564	0.994842	0.646837	0.362093	0.553808	0.0168278	0.0947626	0.431969	0.213526	0.462411	0.914832	0.443107	0.727485	0.913668	0.32479	0.591114	0.263895	0.218893	0.679949	0.156718	0.211869	0.129864	0.397756	0.494037	0.754363	0.668274	0.123766	0.0645917	0.634644	0.986131	0.568098	0.0310901	0.0801199
X268365	0.346465	0.0476636	0.736764	0.40893	0.056056	0.672871	0.408498	0.807536	0.847419	0.735601	0.0279348	0.67688	0.98096	0.676602	0.422626	0.515314	0.327687	0.940703	0.894635	0.895895	0.931549	0.790104	0.550828	0.198886	0.884178	0.200241	0.576308	0.077197	0.145411	0.0793634	0.748882	0.395278	0.672026	0.385958	0.937266	0.205518	0.429701	0.238164	0.639695	0.752652	0.876945	0.884747	0.0220922	0.037045	0.288317	0.714452	0.4746	0.67639	0.1379
X268313	0.433122	0.327976	0.549432	0.198457	0.508553	0.409828	0.676475	0.597508	0.355043	0.221333	0.543131	0.758391	0.114433	0.240432	0.872301	0.0211546	0.723698	0.526278	0.616021	0.744326	0.427205	0.780548	0.644992	0.568086	0.218421	0.957731	0.85681	0.184607	0.635444	0.562956	0.205615	0.764359	0.893163	0.215915	0.635479	0.362015	0.395976	0.90293	0.621703	0.890435	0.123055	0.545857	0.341634	0.293461	0.53224	0.803619	0.384717	0.449872	0.639817
X267649	0.186883	0.553923	0.186539	0.196722	0.267804	0.0406434	0.428512	0.503415	0.00544146	0.0362708	0.915403	0.328631	0.127581	0.784423	0.688881	0.138588	0.947157	0.727605	0.0504461	0.0590315	0.440686	0.810671	0.929796	0.636566	0.552375	0.699221	0.285764	0.129236	0.0046531	0.377318	0.083375	0.802467	0.692816	0.173699	0.0973564	0.160988	0.914574	0.365822	0.870249	0.970234	0.749911	0.22495	0.656688	0.760896	0.631383	0.497698	0.907133	0.871148	0.914157
X267647	0.0214091	0.294462	0.464856	0.0667763	0.00674688	0.0044264	0.708344	0.0892505	0.325235	0.536136	4.26e-06	0.0630128	0.377711	0.324304	0.380309	0.473592	0.165409	0.0983358	0.0533173	0.125652	0.890309	0.619001	0.372349	0.535687	0.117275	0.212686	0.0804199	0.901753	0.664403	0.28868	0.164354	0.369216	0.149611	0.251964	0.666215	0.852725	0.803902	0.805631	0.549546	0.429282	0.761284	0.543001	0.728451	0.996073	0.0268408	0.685054	0.974431	0.475773	0.0680957
X260900	0.481098	0.186774	0.352131	0.998726	0.55132	0.803216	0.736196	0.77252	0.0623747	0.0567458	0.570221	0.6592	0.171834	0.717529	0.677671	0.461579	0.138783	0.0910709	0.129642	0.792149	0.0130573	0.513589	0.556662	0.919696	0.527948	0.10142	0.251608	0.456211	0.460017	0.347465	0.432283	0.448964	0.866199	0.252754	0.202645	0.776197	0.753166	0.339902	0.555531	0.695068	0.404243	0.428812	0.728091	0.908192	0.056188	0.283143	0.0402014	0.27308	0.227398
X252454	0.936303	0.386844	0.0336818	0.519163	0.851612	0.610687	0.843224	0.0760381	0.376227	0.148576	8.23e-10	0.430466	0.114984	0.330591	0.671594	0.81592	0.529336	0.583504	0.882754	0.880119	0.699506	0.875711	0.809602	0.0102434	0.529105	0.993089	0.29395	0.707435	0.782129	0.0208782	0.880656	0.311401	0.812234	0.166943	0.628872	0.0464067	0.135294	0.757551	0.441127	0.471893	0.00800854	0.627691	0.00981154	0.0250678	0.230682	0.0472902	0.524815	0.547903	0.184878
X250380	0.194972	0.238435	0.709844	0.156001	0.57085	0.00670641	0.28905	0.623659	0.130363	0.113751	5.87e-05	0.988164	0.477238	0.0261153	0.15472	0.0704222	0.00188249	0.680466	0.437071	0.742904	0.713472	0.0231195	0.0189022	0.532445	0.410811	0.473546	0.676753	0.130123	0.0760665	0.697587	0.344133	0.229857	0.0144127	0.48788	0.105974	0.525471	0.764922	0.0216486	0.0601738	0.160603	0.163618	0.91592	0.961274	0.820569	0.499745	0.037858	0.297167	0.0907186	0.458105
X246170	0.0701697	0.603208	0.616729	0.441056	0.443634	0.331232	0.959759	0.933232	0.388051	0.389928	8.53e-18	0.522213	0.726531	0.453953	0.696991	0.437399	0.380845	0.224827	0.354044	0.655504	0.0250756	0.670594	0.743596	0.521911	0.166634	0.172903	0.724066	0.43547	0.34552	0.623566	0.144091	0.496858	0.990415	0.158287	0.77967	0.737466	0.615011	0.216874	0.0541145	0.144495	0.156321	0.996827	0.797349	0.940461	0.964297	0.76836	0.424287	0.869737	0.400658
X245705	0.585584	0.56643	0.0979214	0.0433238	0.943427	0.817947	0.0587319	0.405097	0.548609	0.864004	0.000567181	0.933297	0.642995	0.857107	0.827522	0.800658	0.132222	0.241905	0.229669	0.300005	0.158187	0.170604	0.601692	0.319352	0.318674	0.772043	0.614816	0.259403	0.2878	0.531682	0.15872	0.997698	0.724676	0.690749	0.676506	0.22909	0.134524	0.79832	0.0532265	0.30852	0.592311	0.50824	0.0706365	0.0489358	0.309108	0.721942	0.675639	0.817999	0.296301
X243682	0.142203	0.948556	0.774973	0.746748	0.369518	0.380675	0.302166	0.352784	0.107541	0.336693	0.0115853	0.0314721	0.983846	0.283724	0.00603256	0.275792	0.735191	0.345903	0.156646	0.201804	0.878874	0.646903	0.594476	0.303216	0.497046	0.16973	0.0476789	0.0332524	0.287001	0.389426	0.00992572	0.0471584	0.154374	0.0310763	0.784561	0.561123	0.366232	0.854553	0.166602	0.229564	0.0855098	0.966236	0.576311	0.608473	0.538716	0.62305	0.0536917	0.584796	0.29602
X241952	0.01473	0.670515	0.0268555	0.429824	0.787507	0.121703	0.701529	0.536663	0.442049	0.885844	0.459218	0.110845	0.667009	0.537308	0.995809	0.127415	0.674212	0.863453	0.620668	0.220338	0.618098	0.93285	0.639454	0.572214	0.856928	0.194508	0.285898	0.80747	0.142289	0.485608	0.653467	0.76446	0.396248	0.0723488	0.149549	0.0925114	0.487031	0.892106	0.119203	0.452826	0.110614	0.0154215	0.0666804	0.217822	0.677027	0.112868	0.252366	0.197822	0.490147
X241947	0.269606	0.121499	0.416756	0.642397	0.150122	0.766734	0.152543	0.723684	0.370543	0.610804	0.583895	0.678251	0.925243	0.955914	0.254087	0.530044	0.520689	0.245465	0.294575	0.304263	0.710399	0.656159	0.836566	0.481189	0.965224	0.109576	0.423859	0.395088	0.259532	0.767391	0.537774	0.608791	0.805505	0.241008	0.649291	0.431509	0.916748	0.668453	0.46308	0.388869	0.0659331	0.710224	0.360183	0.74316	0.367004	0.317486	0.278188	0.419512	0.267734
X241920	0.05627	0.763112	0.262993	0.0540286	0.975154	0.969982	0.326747	0.451432	0.0319549	0.0749141	0.347805	0.979825	0.797954	0.637904	0.929865	0.764048	0.966969	0.381014	0.0716695	0.820122	0.895992	0.886727	0.334158	0.910283	0.712598	0.201414	0.73415	0.653148	0.651447	0.249538	0.84765	0.473968	0.202307	0.890494	0.756593	0.453992	0.430793	0.668906	0.744756	0.834762	0.306788	0.745424	0.757689	0.83052	0.610496	0.890813	0.330893	0.734526	0.142518
X241898	0.735321	0.637155	0.104043	0.940372	0.685425	0.987782	0.722243	0.892875	0.650058	0.603416	1.27e-06	0.536167	0.603018	0.699819	0.247944	0.26263	0.418521	0.435253	0.477423	0.886999	0.512259	0.955445	0.712007	0.543897	0.404738	0.209282	0.0733794	0.304373	0.939798	0.410035	0.551074	0.731987	0.984891	0.256482	0.978725	0.562821	0.698442	0.683815	0.741536	0.787968	0.130022	0.459723	0.970183	0.909685	0.446345	0.46363	0.673678	0.11782	0.174809
X241881	0.766277	0.020787	0.562809	0.453025	0.881103	0.851754	0.685524	0.823679	0.109702	0.218467	0.00382617	0.199842	0.12048	0.0693725	0.0728156	0.171323	0.85949	0.389178	0.137811	0.175506	0.0637961	0.995453	0.672043	0.443568	0.633811	0.331192	0.76324	0.903549	0.76239	0.567144	0.0960326	0.262028	0.0921078	0.381065	0.253231	0.565849	0.793571	0.216737	0.00468911	0.115697	0.574646	0.187117	0.843129	0.624289	0.974401	0.559218	0.811307	0.686148	0.76705
X241572	0.343249	0.428828	0.22704	0.265113	0.622105	0.336342	0.516581	0.00324363	0.775513	0.15727	0.0165081	0.485957	0.84307	0.511094	0.387295	0.764675	0.7666	0.166565	0.863706	0.318915	0.0609556	0.0271528	0.117743	0.16701	0.0342782	0.0712803	0.973497	0.67319	0.96073	0.622834	0.392655	0.402335	0.720563	0.608364	0.0455993	0.316191	0.128368	0.0747126	0.438529	0.949245	0.888797	0.287752	0.327787	0.208284	0.0612795	0.759914	0.811034	0.105554	0.330499
X241387	0.409185	0.108259	0.0918147	0.972271	0.351647	0.123678	0.644309	0.958164	0.872045	0.593075	0.606719	0.459198	0.578625	0.651019	0.253676	0.872488	0.837676	0.369189	0.941	0.88937	0.781345	0.439042	0.250253	0.00471573	0.536322	0.0686001	0.00998239	0.766834	0.190294	0.535932	0.920987	0.0218158	0.190755	0.618891	0.573492	0.499706	0.764	0.138234	0.690352	0.629589	0.74216	0.417999	0.526726	0.369567	0.15844	0.844664	0.539655	0.625771	0.757398
X241333	0.0111806	0.15634	0.469599	0.34423	0.789856	0.526559	0.324032	0.858039	0.905889	0.594829	3.33e-09	0.365877	0.794381	0.319372	0.00418601	0.473742	0.199068	0.31037	0.659229	0.358559	0.476145	0.0660956	0.240339	0.15915	0.604838	0.138775	0.746042	0.0173551	0.00705825	0.167354	0.816598	0.39823	0.164932	0.0265247	0.517132	0.720667	0.518168	0.486859	0.0473438	0.236694	0.233812	0.385371	0.423834	0.905114	0.601896	0.0883316	0.0129918	0.974056	0.531749
X241057	0.240369	0.439191	0.0320032	0.110106	0.247094	0.220856	0.571266	0.308102	0.431188	0.755386	0.0749826	0.725935	0.445842	0.373429	0.194455	0.636301	0.76641	0.545284	0.837312	0.448083	0.946582	0.475752	0.159911	0.976613	0.518529	0.607185	0.547498	0.757385	0.785334	0.797428	0.166494	0.975117	0.611682	0.974107	0.471742	0.90712	0.840184	0.340909	0.73842	0.466043	0.463252	0.881454	0.262595	0.262157	0.930696	0.514746	0.392391	0.327726	0.385355
X240810	0.449278	0.403801	0.98998	0.804764	0.968862	0.0319329	0.315152	0.866918	0.640836	0.690693	0.678977	0.111508	0.344572	0.837979	0.869779	0.261435	0.585761	0.606991	0.427827	0.851541	0.489931	0.660791	0.704444	0.922193	0.889366	0.6356	0.620249	0.917261	0.445462	0.0610046	0.602056	0.349025	0.477506	0.494478	0.656392	0.565533	0.383063	0.422722	0.576989	0.784537	0.989986	0.795725	0.873299	0.935321	0.531255	0.286661	0.927697	0.4984	0.515924
X240441	0.451495	0.962466	0.293403	0.364715	0.854768	0.665375	0.368756	0.580608	0.96317	0.271354	1.8e-08	0.345553	0.559237	0.635802	0.700656	0.645224	0.251197	0.399416	0.670506	0.79368	0.746557	0.853084	0.992864	0.42099	0.679402	0.191409	0.103534	0.109987	0.11425	0.682056	0.807497	0.660977	0.898915	0.954962	0.674443	0.511437	0.546972	0.999002	0.740008	0.765999	0.683731	0.76515	0.235277	0.238477	0.403096	0.788171	0.280216	0.452519	0.499448
X240440	0.406408	0.219653	0.734544	0.00804848	0.942906	0.712781	0.998909	0.733932	0.661007	0.879444	1.3e-14	0.0279385	0.423142	0.245565	0.00882747	0.224771	0.383796	0.0242361	0.264627	0.69523	0.869837	0.410878	0.175067	0.313526	0.434518	0.358959	0.2282	0.737381	0.239508	0.553637	0.0837272	0.466637	0.82792	0.76249	0.138305	0.698127	0.409098	0.955993	0.0922622	0.743913	0.176742	0.159884	0.89425	0.561832	0.391611	0.312721	0.25098	0.644615	0.89722
X240432	0.821075	0.0340847	0.620071	0.0831252	0.266822	0.0096213	0.00210551	0.175136	0.00591481	0.0419683	0.00536083	0.799161	0.964891	0.268267	0.61411	0.225835	0.222147	0.960507	0.970156	0.778366	0.893808	0.504109	0.572809	0.49239	0.0792916	0.820473	0.907628	0.52951	0.55712	0.921993	0.774504	0.437464	0.241782	0.42953	0.310434	0.369418	0.116299	0.526775	0.375258	0.971003	0.555849	0.555945	0.0766722	0.0410676	0.424652	0.18819	0.561142	0.149503	0.0791989
X239790	0.0566421	0.273284	0.204374	0.123306	0.662316	0.328086	0.159518	0.152713	0.29194	0.474499	0.000617206	0.856161	0.426322	0.850199	0.214463	0.0839855	0.505837	0.156533	0.213639	0.367658	0.441536	0.49364	0.544018	0.815467	0.591319	0.533594	0.685047	0.357366	0.689968	0.489044	0.292812	0.444634	0.0877657	0.489904	0.049878	0.0908065	0.406755	0.291126	0.316894	0.0121478	0.191196	0.159062	0.0878445	0.226445	0.743836	0.046494	0.197543	0.517754	0.0227084
X239344	0.175227	0.0124601	0.970749	0.51929	0.00515348	0.255506	0.250686	0.349165	0.724413	0.945269	3.53e-17	0.68042	0.381368	0.704514	0.0747492	0.74836	0.126591	0.475454	0.366217	0.508238	0.0869804	0.902776	0.560027	0.961481	0.280577	0.862635	0.88448	0.525436	0.154523	0.721014	0.53176	0.678667	0.985309	0.148581	0.910502	0.631898	0.278301	0.023582	0.122252	0.141087	0.0463671	0.281332	0.914951	0.484913	0.071288	0.21369	0.0773283	0.654312	0.155022
X239067	0.730924	0.363057	0.594087	0.114346	0.926629	0.0539469	0.448659	0.443082	0.0896451	0.38893	0.203384	0.625811	0.388764	0.822031	0.751607	0.373724	0.558579	0.981539	0.944009	0.72122	0.00634307	0.219804	0.282712	0.53495	0.182403	0.188054	0.901323	0.567064	0.428375	0.491319	0.722978	0.850096	0.579832	0.313035	0.599559	0.730843	0.706314	0.00396532	0.192572	0.298528	0.364389	0.951277	0.625777	0.44829	0.821482	0.940566	0.503794	0.084315	0.656264
X238955	0.138201	0.820854	0.592383	0.932633	0.142595	0.156641	0.712399	0.833804	0.451047	0.56872	0.159661	0.628802	0.953791	0.727663	0.156431	0.580458	0.138666	0.0584111	0.192683	0.610782	0.75382	0.953974	0.814443	0.606429	0.922222	0.479168	0.344217	0.243285	0.774366	0.242562	0.754991	0.975429	0.387331	0.788156	0.747055	0.811357	0.249188	0.0364531	0.327978	0.632017	0.89686	0.13233	0.906724	0.635374	0.422316	0.907695	0.971971	0.583098	0.478478
X238688	0.092345	0.299056	0.259875	0.218788	0.8802	0.953546	0.297673	0.731395	0.794712	0.83564	5.55e-17	0.4918	0.669925	0.614623	0.00525658	0.445299	0.295162	0.0248788	0.0408677	0.17409	0.229298	0.849736	0.557439	0.497493	0.856863	0.104635	0.180532	0.656786	0.303947	0.685918	0.741257	0.399309	0.62489	0.0863566	0.396943	0.557693	0.368915	0.78458	0.0342732	0.507439	0.0176887	0.279351	0.957536	0.638527	0.964594	0.690541	0.761772	0.115665	0.48938
X238655	0.345806	0.48542	0.147114	0.672864	0.809694	0.921576	0.77814	0.230056	0.931708	0.584887	0.668995	0.0149592	0.568129	0.554812	0.556691	0.00674264	0.114797	0.330289	0.155027	0.990314	0.384398	0.119044	0.73672	0.974705	0.517278	0.0397158	0.463471	0.37158	0.540658	0.030921	0.522389	0.873713	0.198666	0.450296	0.962448	0.162224	0.0987388	0.343005	0.860244	0.280433	0.120018	0.189084	0.374813	0.212517	0.182385	0.294292	0.6389	0.796773	0.75137
X238550	0.181028	0.126636	0.416092	0.730326	0.58535	0.577055	0.2034	0.868606	0.209732	0.806367	2.31e-16	0.815567	0.789588	0.496054	0.70084	0.945155	0.635378	0.129965	0.363962	0.544123	0.604444	0.0313459	0.347785	0.286703	0.0262274	0.17715	0.434388	0.66208	0.975685	0.13293	0.124239	0.434133	0.0845488	0.621241	0.885587	0.571295	0.574972	0.212071	0.0540985	0.416637	0.651784	0.28982	0.268619	0.705836	0.566964	0.0562151	0.20682	0.0864778	0.298192
X238469	0.00923979	0.472674	0.619554	0.431279	0.584864	0.481219	0.926777	0.114834	0.830474	0.618408	9.4e-13	0.173571	0.634005	0.817568	0.73039	0.95735	0.0799891	0.202311	0.15464	0.497014	0.0479745	0.319493	0.944247	0.516734	0.503984	0.142252	0.805381	0.581574	0.850363	0.711649	0.668845	0.288576	0.939381	0.0642187	0.212891	0.746471	0.795679	0.741744	0.0496891	0.286537	0.125649	0.771284	0.959649	0.946761	0.533359	0.488394	0.183732	0.215256	0.139619
X238427	0.572936	0.72202	0.853397	0.632277	0.620608	0.341572	0.536161	0.98295	0.0415973	0.0654869	6.12e-16	0.628039	0.0629476	0.00697339	0.24988	0.718295	0.906373	0.0631962	0.286772	0.73626	0.776411	0.362663	0.962225	0.796137	0.3856	0.790199	0.0048189	0.708173	0.760357	0.489141	0.183794	0.20023	0.346684	0.814526	0.665467	0.0206093	0.0118366	0.695113	0.480904	0.367003	0.964503	0.748672	0.0260098	0.0167176	0.700058	0.965445	0.544784	0.481398	0.0121816
X238404	0.144174	0.140417	0.138159	0.486512	0.221595	0.944259	0.693497	0.0156209	0.00433281	0.0185283	0.437117	0.0664554	0.660207	0.862914	0.639965	0.542084	0.611999	0.50512	0.0494968	0.0576591	0.925076	0.59755	0.410982	0.688964	0.0498885	0.45716	0.688596	0.522563	0.593633	0.100928	0.573679	0.977255	0.837159	0.567241	0.484983	0.0116494	0.022632	0.271582	0.952586	0.56513	0.366837	0.880472	0.0480151	0.0137712	0.413461	0.970152	0.834363	0.110169	0.173471
X238320	0.3403	0.229394	0.136322	0.627355	0.683596	0.648173	0.895667	0.426168	0.374425	0.95909	1.14e-13	0.208003	0.765753	0.152695	0.711563	0.77382	0.663202	0.197233	0.0450683	0.471973	0.769204	0.379567	0.667925	0.123755	0.589849	0.238487	0.494584	0.288709	0.513995	0.00323099	0.823156	0.749042	0.215757	0.0150856	0.255402	0.917055	0.579016	0.140391	0.774149	0.536574	0.143141	0.939964	0.685863	0.477666	0.555701	0.970001	0.298317	0.00831948	0.00051362
X238296	0.231054	0.313626	0.88319	0.16053	0.525454	0.125811	0.746448	0.272135	0.365879	0.220925	7.29e-16	0.365199	0.665469	0.487583	0.383242	0.678195	0.540284	0.489012	0.898405	0.816654	7.86e-05	0.604529	0.148589	0.938733	0.18914	0.164705	0.824543	0.461663	0.862685	0.765813	0.258841	0.207699	0.347543	0.11136	0.140189	0.953164	0.587599	0.101775	0.0434156	0.0236368	0.0505468	0.298652	0.415197	0.253487	0.467055	0.542011	0.186617	0.951011	0.617382
X238238	0.937964	0.250132	0.374325	0.94834	0.0265872	0.228667	0.795172	0.00427791	0.102333	0.884934	0.0224456	0.748026	0.489368	0.881614	0.894993	0.644848	0.910133	0.254309	0.64682	0.824262	0.789519	0.0887388	0.213937	0.60349	0.974795	0.730591	0.143608	0.173542	0.51462	0.920351	0.138636	0.919075	0.486555	0.905448	0.628292	0.332956	0.359055	0.386731	0.643168	0.823732	0.962072	0.935015	0.401693	0.529762	0.747532	0.557362	0.33406	0.990936	0.402698
X237193	0.950967	0.93499	0.58142	0.133055	0.765395	0.228668	0.720445	0.076329	0.111278	0.597646	0.000975037	0.779578	0.0830502	0.886825	0.828661	0.037671	0.115027	0.522258	0.332535	0.814195	0.491703	0.296205	0.00838147	0.668135	0.703327	0.228121	0.0690128	0.223311	0.887529	0.470851	0.0310768	0.428097	0.621264	0.691172	0.252174	0.603347	0.858429	0.0109649	0.788692	0.262728	0.350878	0.893409	0.533836	0.89146	0.330502	0.111005	0.71846	0.32279	0.1197
X236890	0.0351182	0.106426	0.846501	0.0330657	0.0406133	0.336632	0.459526	0.0486222	0.893826	0.778728	4.67e-07	0.308536	0.277206	0.708362	0.0658474	0.745105	0.600945	0.665852	0.586877	0.773202	0.019922	0.00216867	0.00399935	0.168924	0.194487	0.0204651	0.0246601	0.868858	0.397766	0.463765	0.0304153	0.0424542	0.0124825	0.000903242	0.995519	0.172877	0.229608	0.241825	0.123543	0.222047	0.0151176	0.861177	0.0636588	0.0570923	0.13317	0.968785	0.858464	0.124667	0.430291
X236832	0.19876	0.0305908	0.443412	0.836843	0.805597	0.777847	0.991443	0.714634	0.798508	0.765443	0.0205636	0.549389	0.241227	0.290709	0.474054	0.286671	0.23239	0.128793	0.822124	0.329331	0.941764	0.293923	0.403724	0.206575	0.219953	0.654917	0.803143	0.490344	0.689025	0.281993	0.287188	0.942237	0.582037	0.776228	0.98505	0.065491	0.0383089	0.738405	0.49985	0.428931	0.694663	0.483616	0.144058	0.0701775	0.123789	0.862013	0.528492	0.218849	0.738013
X236692	0.668753	0.31726	0.251996	0.625156	0.856521	0.555666	0.363561	0.445075	0.738155	0.976194	1.32e-11	0.360221	0.386324	0.605106	0.583249	0.596183	0.938681	0.632206	0.701471	0.178438	0.766405	0.334103	0.226331	0.27972	0.388451	0.657765	0.795777	0.493897	0.411163	0.576217	0.369771	0.883058	0.992657	0.435077	0.628118	0.210207	0.137355	0.249935	0.16247	0.809359	0.126862	0.985838	0.147299	0.0908652	0.956329	0.233726	0.459253	0.212437	0.800968
X236605	0.644305	0.115062	0.321946	0.0421212	0.415573	0.138932	0.926012	0.477887	0.361834	0.268491	5.76e-06	0.503149	0.862898	0.158999	0.695652	0.605126	0.0313674	0.278404	0.140453	0.132721	0.462636	0.0157055	0.114738	0.722883	0.256963	0.239577	0.813862	0.889011	0.518563	0.171881	0.438357	0.174866	0.009156	0.976424	0.916302	0.898524	0.770518	0.0588845	0.494055	0.0500111	0.466972	0.349028	0.784378	0.697207	0.665404	0.395925	0.262641	0.54363	0.680841
X235327	0.959297	0.143884	0.163058	0.779798	0.319889	0.480089	0.805366	0.331199	0.466343	0.859476	0.0349008	0.173512	0.864525	0.39829	0.668378	0.884878	0.328213	0.225368	0.698148	0.786866	0.724925	0.225122	0.122782	0.465972	0.999393	0.489515	0.0429044	0.11009	0.885308	0.181713	0.560973	0.541381	0.445222	0.548013	0.933645	0.902734	0.920762	0.966104	0.270871	0.293084	0.445153	0.193118	0.24513	0.473928	0.821097	0.671583	0.356305	0.446712	0.304308
X234717	0.341146	0.528676	0.224108	0.880555	0.153525	0.124718	0.193251	0.643806	0.238849	0.090329	1.05e-07	0.195272	0.349927	0.209127	0.241753	0.503549	0.489703	0.879283	0.428718	0.200048	0.738559	0.131948	0.242625	0.544995	0.575378	0.474936	0.017983	0.580077	0.636678	0.060878	0.77211	0.226614	0.493044	0.494338	0.500871	0.86901	0.856464	0.449972	0.206951	0.312381	0.969515	0.227708	0.917838	0.937982	0.990032	0.579182	0.824066	0.824112	0.620011
X234646	0.447884	0.790631	0.404885	0.177775	0.850793	0.329225	0.999426	0.797774	0.0741412	0.187852	0.0337791	0.502011	0.982741	0.331131	0.351015	0.520466	0.737136	0.149559	0.32415	0.484895	0.716239	0.731033	0.692455	0.982423	0.401718	0.929775	0.26908	0.183812	0.64124	0.0777889	0.531093	0.409095	0.58509	0.937946	0.328681	0.418144	0.729102	0.381694	0.622216	0.746758	0.111413	0.428554	0.346961	0.449603	0.676721	0.71817	0.644735	0.139513	0.0713357
X233455	0.963433	0.502126	0.722734	0.118922	0.9282	0.635052	0.992581	0.5522	0.0460189	0.0953423	1.69e-05	0.434613	0.285778	0.578903	0.842998	0.126613	0.330231	0.101823	0.36728	0.880551	0.273841	0.214519	0.0433607	0.107332	0.140159	0.756942	0.850341	0.410948	0.0544542	0.361126	0.7551	0.100347	0.246789	0.688155	0.965576	0.571067	0.556113	0.603325	0.296695	0.175742	0.292088	0.777272	0.755477	0.839785	0.482942	0.376592	0.380332	0.871234	0.356312
X233410	0.560461	0.109496	0.324349	0.455463	0.0284538	0.461184	0.665879	0.033264	0.922475	0.75913	9.14e-05	0.212064	0.74816	0.924735	0.331048	0.31681	0.62623	0.828603	0.777195	0.401019	0.104352	0.119195	0.0123471	0.0133637	0.487918	0.119244	0.0182596	0.999429	0.0313113	0.200414	0.7976	0.0849054	0.207303	0.0256571	0.388236	0.859844	0.521439	0.363118	0.576531	0.402182	0.514578	0.735477	0.190084	0.228548	0.965817	0.619521	0.793457	0.79844	0.922479
X233361	0.23516	0.0987983	0.576764	0.417967	0.0927167	0.0605831	0.97637	0.909749	0.794235	0.648815	0.940767	0.750271	0.575294	0.892548	0.0549479	0.618738	0.266248	0.34845	0.0866334	0.122292	0.036005	0.483835	0.573935	0.368697	0.926425	0.770317	0.491603	0.749945	0.661603	0.688161	0.32029	0.185898	0.351555	0.0260581	0.265399	0.0171949	0.0222933	0.15289	0.981492	0.295171	0.0108089	0.409197	0.00181021	0.0016154	0.870814	0.58255	0.194298	0.913699	0.0305829
X233111	0.590083	0.548506	0.198323	0.147499	0.786869	0.778702	0.617517	0.556633	0.265349	0.139022	0.136878	0.627805	0.561542	0.100815	0.830566	0.328135	0.840945	0.133555	0.428818	0.0459622	0.661514	0.325234	0.343724	0.204496	0.295911	0.984095	0.429782	0.534487	0.136786	0.914952	0.179689	0.179561	0.783722	0.400467	0.482027	0.660353	0.723954	0.651139	0.158411	0.466926	0.513207	0.715451	0.628533	0.7348	0.0341129	0.845576	0.950657	0.355327	0.625542
X232219	0.665755	0.365743	0.484789	0.0299674	0.48234	0.406953	0.501428	0.341183	0.127525	0.239239	0.482862	0.615759	0.0813325	0.236891	0.827607	0.456594	0.0494591	0.45798	0.164394	0.410839	0.836179	0.155693	0.622555	0.309005	0.768873	0.520092	0.790018	0.126374	0.0586675	0.423172	0.000184271	0.0141757	0.0375497	0.613785	0.922281	0.472951	0.280886	0.544495	0.0360705	0.555732	0.983725	0.566328	0.958715	0.665406	0.824365	0.127184	0.118579	0.258617	0.750423
X231990	0.0278783	0.201619	0.00375307	0.92821	0.929267	0.44475	0.509958	0.568569	0.230528	0.0858594	0.000363106	0.0392352	0.383935	0.40562	0.00747657	0.434359	0.0776048	0.996137	0.964801	0.738923	0.366692	0.362471	0.0514005	0.252217	0.0383102	0.90952	0.412772	0.206656	0.304139	0.191785	0.0539635	0.789391	0.358339	0.908916	0.92718	0.741298	0.96641	0.234634	0.555092	0.0407288	0.350204	0.966347	0.490751	0.459185	0.847168	0.254017	0.107685	0.301971	0.216673
X231947	0.0600905	0.637835	0.965669	0.0146303	0.00197495	0.00782844	0.0960356	0.750226	0.729537	0.458948	1.21e-07	0.152921	0.0413106	0.274405	0.790334	0.373601	0.691363	0.591008	0.342566	0.999739	0.658656	0.571742	0.360059	0.68094	0.259045	0.752855	0.763143	0.752621	0.380174	0.522263	0.561483	0.462609	0.411787	0.155896	0.381266	0.660375	0.924977	0.845265	0.866814	0.903584	0.78364	0.78429	0.86232	0.803906	0.739496	0.503353	0.103487	0.64368	0.106983
X231881	0.628651	0.711952	0.885958	0.934123	0.595654	0.136718	0.343358	0.518674	0.239647	0.137209	0.0484888	0.0146664	0.235261	0.712512	0.345207	0.26355	0.538659	0.870525	0.489686	0.963807	0.85497	0.302768	0.413162	0.204229	0.665843	0.432387	0.716456	0.962794	0.278633	0.585214	0.453164	0.256974	0.985523	0.158503	0.219183	0.982081	0.682445	0.463791	0.972823	0.77161	0.0903348	0.701861	0.789225	0.533905	0.28268	0.665147	0.620053	0.320635	0.279436
X231850	0.485818	0.290329	0.300217	0.420276	0.886502	0.630127	0.448803	0.85961	0.0424791	0.141102	0.00231021	0.24437	0.197476	0.658906	0.31212	0.641431	0.131878	0.207693	0.0784723	0.283954	0.502278	0.947194	0.539082	0.953846	0.30729	0.714645	0.445173	0.527684	0.0257616	0.482151	0.065701	0.0818624	0.150723	0.400276	0.822921	0.841036	0.833833	0.204808	0.0528833	0.455931	0.987977	0.49638	0.971824	0.697424	0.76537	0.493039	0.477646	0.731831	0.364867
X231674	0.806157	0.744958	0.518306	0.986879	0.711308	0.651398	0.785956	0.163007	0.24522	0.323865	0.00275649	0.457402	0.386097	0.835063	0.512168	0.0434743	0.850278	0.405949	0.349818	0.0447065	0.217095	0.259743	0.565358	0.675219	0.477866	0.243113	0.576875	0.750572	0.914203	0.701746	0.73695	0.816571	0.669462	0.695202	0.535282	0.69451	0.840848	0.485267	0.080808	0.775359	0.653724	0.458637	0.51865	0.876969	0.905583	0.00603845	0.0946565	0.714034	0.945133
X231664	0.207329	0.719439	0.322103	0.169674	0.717343	0.889817	0.505506	0.800232	0.617154	0.602654	7.41e-11	0.0990811	0.551879	0.765664	0.312431	0.683432	0.221095	0.827437	0.14576	0.0904139	0.81396	0.984806	0.066594	0.87707	0.782941	0.237255	0.131916	0.855683	0.937782	0.168734	0.0429625	0.0130587	0.0017671	0.302408	0.631311	0.00400031	0.00260008	0.827415	0.754196	0.296533	0.200813	0.104744	0.00581974	0.00561391	0.507626	0.0291639	0.445933	0.0150296	0.00429168
X231659	0.958882	0.31976	0.36285	0.118973	0.532455	0.284444	0.163665	0.690876	0.745162	0.814812	0.415327	0.328528	0.482787	0.555896	0.772641	0.453502	0.783714	0.935092	0.499113	0.578051	0.601612	0.948027	0.821597	0.442967	0.937968	0.841764	0.661231	0.83418	0.324645	0.371548	0.490149	0.0796166	0.945748	0.866169	0.397994	0.275248	0.356515	0.692568	0.254079	0.911303	0.323727	0.476494	0.994069	0.874628	0.213732	0.249909	0.725065	0.444538	0.781376
X231657	0.0945161	0.41979	0.133813	0.0288919	0.00278762	0.0378363	0.30411	0.820945	0.125522	0.0966306	0.0631	0.781636	0.509004	0.525882	0.256917	0.56843	0.129715	0.335523	0.457081	0.529293	0.0510804	0.518185	0.882958	0.417754	0.839383	0.445643	0.0436882	0.872317	0.430174	0.67693	0.639153	0.359388	0.0265855	0.0130401	0.520451	0.0665616	0.0171366	0.912883	0.282559	0.258552	0.0368676	0.86789	0.0623904	0.067351	0.909736	0.440395	0.965395	0.500625	0.194324
X231656	0.154229	0.487766	0.849779	0.0330711	0.301693	0.234361	0.670673	0.00324232	0.554868	0.665215	7.65e-26	0.698885	0.282937	0.902024	0.787299	0.569541	0.887336	0.485567	0.316596	0.16227	0.167406	0.88208	0.356372	0.227322	0.599083	0.72299	0.208034	0.498706	0.589962	0.441217	0.431604	0.671884	0.912631	0.427024	0.568782	0.433453	0.270899	0.438377	0.453356	0.859949	0.151699	0.176882	0.818257	0.777984	0.416554	0.123217	0.69041	0.138472	0.889025
X231655	0.106643	0.665701	0.353588	0.601733	0.211978	0.0668783	0.890671	0.285544	0.843466	0.926608	1.05e-27	0.155972	0.897663	0.210126	0.688758	0.924409	0.333179	0.0194329	0.00439478	0.328698	0.895086	0.298504	0.877561	0.901709	0.858571	0.262986	0.109064	0.312275	0.357655	0.0144745	0.250694	0.56585	0.778324	0.750198	0.300703	0.146574	0.273657	0.727212	0.13702	0.226442	0.664963	0.250942	0.233114	0.476933	0.782622	0.755976	0.290823	0.115508	0.976118
X231652	0.790198	0.829906	0.0266822	0.125186	0.109512	0.495513	0.963033	0.297496	0.279992	0.640954	0.00205616	0.554688	0.402623	0.781384	0.80351	0.0880253	0.948082	0.125463	0.325997	0.167329	0.125364	0.300001	0.277609	0.518369	0.996606	0.0462728	0.257031	0.97834	0.0793708	0.772453	0.692542	0.733312	0.302215	0.0809889	0.0386269	0.531585	0.84698	0.333877	0.91212	0.34402	0.132829	0.106743	0.478361	0.879095	0.0463771	0.705221	0.0967969	0.990835	0.70459
X231326	0.857422	0.678672	0.214924	0.155804	0.173315	0.580034	0.437183	0.429042	0.241399	0.400734	6.75e-08	0.565616	0.39371	0.460069	0.713885	0.904703	0.815831	0.934765	0.810952	0.28143	0.479668	0.453712	0.831441	0.428683	0.381073	0.103193	0.642045	0.218022	0.300321	0.636174	0.246416	0.909044	0.252171	0.793557	0.514358	0.93508	0.980692	0.0445796	0.992239	0.770185	0.63468	0.980565	0.912275	0.831387	0.809171	0.849589	0.640989	0.47313	0.979986
X231207	0.0800762	0.534972	0.0656289	0.882773	0.879937	0.650268	0.554955	0.381521	0.766363	0.145131	0.00348523	0.619712	0.0141847	0.496687	0.776931	0.387238	0.881942	0.787025	0.733103	0.74599	0.0425286	0.900492	0.946795	0.61215	0.0441599	0.656552	0.928937	0.216962	0.62484	0.380464	0.896023	0.184521	0.693671	0.0530326	0.758896	0.125594	0.351973	0.996656	0.0390131	0.472044	0.469204	0.238845	0.00802396	0.0293659	0.235322	0.606583	0.894186	0.819898	0.0676221
X231194	0.669657	0.312964	0.496747	0.801274	0.0973054	0.16122	0.42304	0.376635	0.306336	0.471253	0.0838716	0.716978	0.158002	0.0876941	0.620633	0.955697	0.77136	0.798571	0.329476	0.354531	0.720301	0.81128	0.56615	0.798622	0.576911	0.428413	0.583913	0.416854	0.616003	0.453966	0.906306	0.750184	0.729661	0.502387	0.526952	0.821279	0.770085	0.653349	0.611005	0.3322	0.193332	0.552064	0.702283	0.992747	0.93216	0.0276096	0.107343	0.886039	0.176827
X231180	0.0127619	0.632603	0.262068	0.896722	0.874299	0.23227	0.0761447	0.0505111	0.453823	0.480939	3.05e-10	0.636605	0.570458	0.648764	0.424291	0.446429	0.851081	0.577969	0.159402	0.352147	0.388051	0.646017	0.245612	0.477673	0.833379	0.272864	0.282875	0.5914	0.746678	0.304394	0.339088	0.993229	0.893295	0.692174	0.716234	0.283469	0.506576	0.396394	0.0822771	0.885013	0.164641	0.658009	0.700421	0.584561	0.486256	0.353781	0.146839	0.310075	0.246841
X229124	0.00650235	0.373612	0.406558	0.322262	0.778849	0.0985451	0.540591	0.0406514	0.0454573	0.173537	1.56e-19	0.856948	0.0603133	0.366622	0.252511	0.505377	0.990189	0.946902	0.840413	0.689153	0.247479	0.595206	0.692779	0.31005	0.477078	0.524195	0.0491893	0.291469	0.336938	0.0504522	0.251028	0.426145	0.00389987	0.0633862	0.25154	0.815556	0.578867	0.808287	0.0938764	0.0865306	0.0969934	0.156014	0.904562	0.686411	0.0204257	0.127342	0.775891	0.976314	0.195907
X228978	0.191744	0.933541	0.153788	0.165504	0.0969671	0.671098	0.00664317	0.4033	0.267898	0.071071	5.9e-09	0.887658	0.270364	0.466031	0.462998	0.942665	0.490094	0.703438	0.149549	0.230164	0.424615	0.84168	0.696291	0.66117	0.397288	0.696133	0.412873	0.62424	0.650738	0.489544	0.567842	0.628046	0.655569	0.185345	0.886651	0.879686	0.673052	0.1054	0.0815112	0.963606	0.479885	0.817244	0.681318	0.994001	0.612203	0.0566318	0.0518688	0.655476	0.997649
X228928	0.117255	0.707322	0.360275	0.152986	0.909078	0.45648	0.481427	0.0485412	0.123794	0.603187	0.00258412	0.307968	0.539213	0.0529714	0.0228321	0.280949	0.248118	0.161964	0.183793	0.774207	0.497093	0.657247	0.992889	0.515958	0.62045	0.711164	0.734572	0.778274	0.820236	0.240287	0.206221	0.523669	0.165276	0.962674	0.817215	0.394147	0.595183	0.471517	0.994848	0.821712	0.291068	0.613367	0.260813	0.363641	0.985566	0.211262	0.332756	0.767746	0.0235348
X228911	0.207981	0.578622	0.253819	0.399516	0.346062	0.247742	0.97328	0.839895	0.837152	0.353357	0.185903	0.201772	0.209096	0.845795	0.365898	0.65323	0.871794	0.689993	0.511913	0.492556	0.274707	0.707701	0.388515	0.0394384	0.0674854	0.47318	0.171203	0.297004	0.772506	0.644664	0.880113	0.112665	0.383664	0.0762221	0.567739	0.764344	0.513461	0.133071	0.96339	0.922136	0.475687	0.70792	0.933375	0.993865	0.655699	0.112688	0.641294	0.291353	0.638857
X228885	0.832052	0.946652	0.161691	0.539882	0.301676	0.692363	0.567407	0.849257	0.965705	0.39937	2.9e-09	0.449768	0.450524	0.959951	0.813668	0.591718	0.918762	0.28633	0.275214	0.173667	0.263637	0.255171	0.404056	0.272485	0.264976	0.332669	0.666763	0.822422	0.581445	0.409674	0.58771	0.888648	0.161165	0.581742	0.354185	0.629108	0.636795	0.0196822	0.386578	0.17025	0.696044	0.873905	0.517412	0.527131	0.997143	0.81927	0.373292	0.383299	0.378151
X228668	0.127395	0.00666408	0.459355	0.98168	0.0263632	0.184554	0.123653	0.363304	0.0902796	0.630901	1.26e-10	0.0494115	0.368577	0.103731	0.0177064	0.29714	0.029366	0.582331	0.495113	0.474527	0.0586812	0.317486	0.311795	0.598851	0.0938994	0.362152	0.651475	0.589273	0.419405	0.0100062	0.408153	0.0727506	0.991169	0.817596	0.0402539	0.970694	0.49201	0.208651	0.0129338	0.0203289	0.108862	0.103465	0.996866	0.642978	0.430607	0.879534	0.864061	0.537158	0.787643
X228613	0.225015	0.253781	0.376153	0.229105	0.713028	0.335378	0.761541	0.616891	0.866493	0.568795	3.12e-09	0.355066	0.134922	0.809662	0.180177	0.436814	0.7024	0.574285	0.717815	0.238784	0.18112	0.180985	0.375341	0.115012	0.00263233	0.16728	0.403905	0.628413	0.473769	0.802275	0.641106	0.577566	0.997734	0.0628475	0.701648	0.579483	0.215687	0.574177	0.171439	0.917985	0.0401769	0.961338	0.394231	0.480449	0.776906	0.946028	0.336933	0.510567	0.274306
X228572	0.450054	0.808592	0.701168	0.0921943	0.138853	0.00833315	0.166613	0.83967	0.589463	0.905984	1.9e-05	0.416724	0.914251	0.301305	0.427751	0.695515	0.35628	0.351752	0.744064	0.270453	0.18643	0.311916	0.991841	0.0704604	0.0124779	0.517407	0.887436	0.477943	0.230726	0.571174	0.995699	0.176746	0.67716	0.200912	0.671561	0.663168	0.256852	0.422946	0.763181	0.172957	0.662945	0.812759	0.97475	0.441208	0.380044	0.236544	0.29844	0.907699	0.82212
X228382	0.114348	0.633934	0.102297	0.014113	0.419215	0.459902	0.833902	0.157667	0.273705	0.638013	0.507945	0.356148	0.570664	0.405764	0.502557	0.027926	0.304357	0.501018	0.679587	0.6904	0.150436	0.901446	0.551741	0.571399	0.434155	0.149656	0.311421	0.766788	0.672218	0.829194	0.144678	0.166806	0.68114	0.491322	0.404892	0.194491	0.412012	0.689216	0.75011	0.421102	0.26864	0.482183	0.351068	0.246578	0.377239	0.700298	0.795028	0.943139	0.990555
X228346	0.607697	0.345202	0.0813661	0.161293	0.162484	0.634213	0.357776	0.238923	0.437023	0.994962	0.0158266	0.314227	0.138177	0.243091	0.863502	0.539623	0.11614	0.262521	0.759875	0.0546261	0.112733	0.672137	0.859955	0.856327	0.993803	0.502011	0.209918	0.486001	0.348823	0.830925	0.53561	0.403707	0.673987	0.431521	0.726523	0.258141	0.287175	0.703561	0.832648	0.619807	0.847332	0.414332	0.850741	0.660417	0.51063	0.743866	0.85299	0.312678	0.275288
X228139	0.0756717	0.65171	0.941553	0.00334868	0.221127	0.131038	0.194983	0.299265	0.316116	0.451929	0.0128238	0.190591	0.841588	0.498069	0.203889	0.706899	0.131728	0.253088	0.886445	0.198615	0.881575	0.0167367	0.0723821	0.360815	0.453875	0.780902	0.965072	0.804569	0.909403	0.8627	0.32939	0.171942	0.00544115	0.651449	0.440012	0.517766	0.32842	0.0286712	0.878101	0.901189	0.361484	0.435635	0.537124	0.300281	0.713319	0.0914126	0.317885	0.110918	0.071247
X228112	0.83623	0.0823836	0.646275	0.207554	0.372081	0.00834841	0.98231	0.774321	0.130922	0.346645	0.306228	0.457019	0.292639	0.0669238	0.0518196	0.813446	0.434365	0.691897	0.484207	0.133647	0.91304	0.235906	0.047851	0.0492362	0.433809	0.256055	0.321421	0.595239	0.709419	0.248405	0.737871	0.776534	0.324871	0.143493	0.754612	0.699121	0.66554	0.0170368	0.364022	0.217699	0.129078	0.776772	0.452374	0.393748	0.641757	0.531214	0.463076	0.076178	0.106055
X228008	0.070715	0.906101	0.780773	0.695739	0.000151445	0.930667	0.430479	0.851641	0.498393	0.359374	0.949304	0.396557	0.188841	0.690623	0.199191	0.827019	0.867057	0.189073	0.354658	0.323081	0.187882	0.771742	0.77109	0.0669366	0.604382	0.523757	0.0537891	0.160137	0.1129	0.91712	0.321614	0.0389776	0.0710626	0.0159392	0.127783	0.80664	0.56647	0.564871	0.783602	0.384686	0.0869049	0.423945	0.138595	0.0961119	0.0385765	0.90177	0.643601	0.751689	0.0347037
X227996	0.0325231	0.133207	0.771408	0.775453	0.0231978	0.947333	0.633255	0.0279019	0.142391	0.743626	6.82e-09	0.617177	0.55732	0.821576	0.384823	0.964648	0.585025	0.841001	0.348218	0.130646	0.275667	0.384931	0.490778	0.32985	0.395634	0.249638	0.384854	0.477181	0.219127	0.061543	0.616178	0.810328	0.702247	0.49596	0.0510507	0.0584421	0.138078	0.873356	0.777312	0.81519	0.508692	0.0221801	0.03312	0.166619	0.904044	0.29273	0.493955	0.126145	0.0141122
X227724	0.708372	0.387636	0.190999	0.325687	0.443179	0.93386	0.258196	0.530361	0.942421	0.443126	0.687138	0.625783	0.441209	0.833425	0.911091	0.965208	0.702538	0.535332	0.521866	0.305499	0.937799	0.896695	0.418801	0.387076	0.803797	0.797907	0.336513	0.304932	0.50671	0.308133	0.44634	0.658093	0.204522	0.429058	0.387952	0.32819	0.988014	0.680695	0.31971	0.715836	0.89274	0.743862	0.459714	0.782174	0.519296	0.373812	0.694824	0.371733	0.429735
X227655	0.05832	0.0136799	0.777575	0.251074	0.432781	0.777624	0.323665	0.201083	0.0949492	0.73354	8.3e-06	0.890123	0.363396	0.134545	0.986292	0.12692	0.607214	0.132492	0.626008	0.901054	0.216311	0.0558375	0.0575819	0.40072	0.737275	0.51976	0.497855	0.409726	0.7045	0.456253	0.345568	0.194921	0.549354	0.377536	0.259958	0.659481	0.264355	0.380376	0.726952	0.882775	0.616649	0.172527	0.915759	0.375793	0.564287	0.459764	0.186869	0.359151	0.00695864
X227632	0.702251	0.934221	0.481437	0.647561	0.940319	0.787481	0.4401	0.11984	0.982056	0.666226	0.912526	0.395144	0.222615	0.181858	0.253857	0.74114	0.78994	0.904501	0.725881	0.909663	0.587355	0.429871	0.4614	0.998059	0.188554	0.238857	0.321938	0.162325	0.00298663	0.822293	0.859117	0.513504	0.797258	0.64432	0.103468	0.166178	0.295612	0.111544	0.795254	0.47624	0.843241	0.729015	0.440037	0.598824	0.383905	0.882093	0.242909	0.926648	0.996153
X227367	0.0409463	0.00917902	0.342112	0.450351	0.488234	0.621665	0.212951	0.916307	0.456371	0.118169	6.1e-08	0.775293	0.662564	0.833748	0.663272	0.364262	0.0482254	0.103473	0.017138	0.151507	0.707004	0.150127	0.449773	0.572044	0.781218	0.909236	0.378513	0.247388	0.449649	0.792691	0.30915	0.334689	0.795486	0.773363	0.715825	0.377248	0.920422	0.295979	0.14225	0.694426	0.786746	0.190924	0.202984	0.650559	0.810439	0.4194	0.401933	0.333239	0.139277
X227366	0.00106454	0.632602	0.465217	0.134026	0.164718	0.407178	0.190835	0.417705	0.254955	0.275291	1.54e-07	0.367221	0.706872	0.265711	0.472912	0.992069	0.113713	0.46559	0.856949	0.747724	0.159883	0.341838	0.475615	0.744945	0.192513	0.0635061	0.675178	0.257686	0.85043	0.660566	0.235087	0.567547	0.0491518	0.0739859	0.309227	0.82484	0.986926	0.258964	0.226382	0.396696	0.317011	0.823427	0.257989	0.331036	0.575721	0.0193572	0.745133	0.652684	0.767904
X227322	0.0432545	0.789841	0.469979	0.161788	0.397228	0.0786726	0.621073	0.158274	0.401309	0.969312	0.0323659	0.57565	0.0212707	0.109634	0.945917	0.0807954	0.793237	0.362707	0.217787	0.594415	0.923582	0.0991044	0.1546	0.262352	0.28897	0.433873	0.850267	0.72762	0.527644	0.464303	0.624836	0.933284	0.442687	0.785357	0.0488579	0.175315	0.774838	0.364203	0.916297	0.256571	0.593959	0.688122	0.508744	0.798562	0.948326	0.373557	0.520261	0.112775	0.186144
X227307	0.00295341	0.846491	0.976119	0.345872	0.677361	0.263138	0.489082	0.838976	0.399664	0.275505	1.46e-20	0.327362	0.821521	0.593448	0.921804	0.845839	0.635625	0.179735	0.325941	0.745472	0.0899014	0.909584	0.503706	0.534683	0.647506	0.3481	0.663197	0.604985	0.979485	0.773358	0.965475	0.598891	0.730093	0.119676	0.588319	0.951241	0.892416	0.487331	0.00868494	0.0489374	0.0459627	0.788066	0.979856	0.995625	0.426577	0.307223	0.118926	0.932317	0.0902695
X227299	0.986049	0.289004	0.0481876	0.086633	0.675018	0.0405796	0.438384	0.678672	0.685076	0.990617	1.39e-06	0.32588	0.144474	0.924623	0.567041	0.194286	0.408324	0.317033	0.620466	0.165828	0.983907	0.804818	0.083862	0.469377	0.149662	0.612377	0.173601	0.141216	0.825345	0.898261	0.712646	0.610921	0.456375	0.120643	0.318734	0.388089	0.0797175	0.0146306	0.919938	0.767128	0.495185	0.181133	0.370752	0.167547	0.745975	0.861974	0.137285	0.594629	0.863309
X226876	0.564079	0.636953	0.00452132	0.978447	0.44057	0.674093	0.0839929	0.781271	0.117391	0.236447	0.00270847	0.341512	0.165363	0.667236	0.960335	0.123679	0.467354	0.324022	0.499136	0.21015	0.5853	0.119804	0.252715	0.819543	0.267951	0.625099	0.722077	0.982453	0.526622	0.586544	0.531936	0.5219	0.451027	0.348512	0.497375	0.233747	0.413891	0.58757	0.436351	0.860049	0.33762	0.129614	0.125972	0.224911	0.947893	0.678462	0.449576	0.703941	0.347808
X226330	0.943835	0.519924	0.457666	0.667907	0.41128	0.560164	0.847562	0.957318	0.622323	0.504155	0.10995	0.196423	0.53328	0.287585	0.106439	0.82935	0.227378	0.667007	0.98381	0.73465	0.633928	0.590721	0.791444	0.433069	0.402032	0.508277	0.642568	0.457034	0.902439	0.689571	0.6417	0.0835848	0.91707	0.994206	0.339783	0.0492953	0.122994	0.0263494	0.443669	0.809089	0.272307	0.622786	0.0646072	0.169392	0.0341144	0.403351	0.724225	0.762238	0.0652571
X226303	0.100516	0.469308	0.127013	0.0158384	0.374557	0.450286	0.996638	0.117671	0.482765	0.179322	3.68e-05	0.0359169	0.112848	0.699406	0.600879	0.666869	0.136912	0.468364	0.322179	0.121162	0.055561	0.986772	0.725143	0.540332	0.371159	0.646605	0.240573	0.499921	0.793504	0.319699	0.869405	0.476283	0.431375	0.55847	0.200305	0.161478	0.0197856	0.374275	0.792993	0.46663	0.134398	0.382721	0.0443961	0.0120321	0.18756	0.573608	0.514126	0.572847	0.590785
X226280	0.9431	0.0989624	0.292458	0.075142	0.217233	0.0274275	0.621748	0.220902	0.776868	0.81118	2.98e-19	0.977394	0.421281	0.333605	0.539305	0.358832	0.821052	0.709892	0.677071	0.507751	0.0613753	0.297005	0.311491	0.912553	0.398682	0.799936	0.2509	0.345334	0.244017	0.34113	0.616462	0.942723	0.129707	0.232796	0.0974161	0.348313	0.149172	0.0346732	0.221912	0.277153	0.177935	0.236208	0.244664	0.125616	0.417267	0.906275	0.693212	0.552252	0.770822
X226083	0.858925	0.621855	0.475964	0.153134	0.804667	0.454712	0.0811186	0.238051	0.969214	0.174901	4.43e-05	0.0600436	0.740266	0.724307	0.877855	0.717234	0.255719	0.108186	0.20163	0.672122	0.954671	0.2004	0.635847	0.475048	0.0885231	0.251683	0.143516	0.958074	0.235058	0.295564	0.600807	0.0825131	0.214619	0.00107185	0.485868	0.0685351	0.307275	0.93921	0.820302	0.855281	0.00115648	0.298112	0.0181733	0.100663	0.437794	0.0354314	0.260479	0.952325	0.674101
X226065	0.645807	0.826913	0.608159	0.462316	0.462124	0.722904	0.615421	0.448546	0.402166	0.581547	3.66e-12	0.80543	0.469638	0.578139	0.883147	0.629898	0.533637	0.85304	0.487559	0.983435	0.92653	0.673415	0.255108	0.892673	0.051031	0.0341379	0.285226	0.759569	0.570745	0.0747203	0.778636	0.615238	0.228154	0.833737	0.693133	0.441031	0.492639	0.875692	0.0478358	0.761884	0.911832	0.988349	0.432353	0.422037	0.720384	0.254523	0.141149	0.207033	0.423647
X225923	0.388837	0.696821	0.729896	0.423738	0.726222	0.569753	0.682431	0.444336	0.254797	0.153998	0.199789	0.256562	0.740308	0.912203	0.000924439	0.208165	0.554103	0.803114	0.461232	0.547829	0.0281074	0.773914	0.774248	0.0844562	0.164359	0.727738	0.0149162	0.870054	0.625843	0.759794	0.534229	0.295001	0.379217	0.828437	0.00559879	0.664103	0.516595	0.870217	0.0431109	0.404105	0.101334	0.0601864	0.7232	0.524774	0.159096	0.0849838	0.729336	0.907153	0.0971684
X225896	0.751157	0.0455923	0.340553	0.0471595	0.412655	0.115046	0.260268	0.159793	0.161175	0.427561	0.000104955	0.632765	0.447374	0.0237193	0.178178	0.263438	0.652646	0.842995	0.363796	0.132931	0.900858	0.0188173	0.00837274	0.267204	0.610069	0.164264	0.0410986	0.427871	0.365566	0.131304	0.141959	0.918946	0.505948	0.0530886	0.510833	0.745712	0.657009	0.0668707	0.549506	0.429658	0.029837	0.993929	0.70519	0.788787	0.860165	0.189381	0.499081	0.568071	0.300148
X225892	0.00917007	0.390095	0.160275	0.636882	0.510929	0.766786	0.832388	0.587128	0.438325	0.776933	4.51e-35	0.0176465	0.609103	0.392588	0.0727107	0.799698	0.0507698	0.630785	0.22143	0.520712	0.813799	0.688512	0.618376	0.249938	0.753889	0.343648	0.778809	0.593908	0.500263	0.0599488	0.793904	0.288045	0.858111	0.591341	0.0688405	0.480373	0.948135	0.329847	0.000312063	0.116431	0.0657577	0.782095	0.991891	0.930161	0.828829	0.69033	0.735718	0.939752	0.114899
X225884	0.0949712	0.416539	0.200444	0.36581	0.20243	0.0775688	0.025228	0.64958	0.96298	0.714024	3.53e-17	0.104225	0.614172	0.176097	0.00321791	0.817551	0.228872	0.225369	0.335503	0.427934	0.150593	0.59373	0.317164	0.641516	0.340181	0.682337	0.242636	0.782777	0.775603	0.32669	0.186241	0.554391	0.889171	0.673043	0.950572	0.88295	0.939163	0.0885741	0.0170572	0.713437	0.692374	0.909666	0.952963	0.803397	0.14007	0.231529	0.319292	0.183985	0.0875405
X225863	0.759026	0.446633	0.528688	0.878331	0.998	0.104379	0.0258652	0.0609524	0.429197	0.0339353	0.296429	0.300268	0.25477	0.656375	0.121655	0.756528	0.849854	0.973787	0.240089	0.75825	0.905707	0.923451	0.780081	0.161044	0.7794	0.664694	0.0847178	0.0475666	0.000619601	0.100995	0.957181	0.0685008	0.743172	0.783527	0.37364	0.454321	0.719471	0.881047	0.0909323	0.735172	0.149983	0.117953	0.628368	0.720717	0.189319	0.705989	0.615672	0.114835	0.284066
X225516	0.200159	0.91898	0.627102	0.519712	0.389129	0.60566	0.579862	0.293037	0.54152	0.795587	0.00028086	0.280182	0.582174	0.476194	0.874786	0.731642	0.737935	0.651125	0.572984	0.998005	0.583563	0.685088	0.827847	0.358493	0.0934015	0.633094	0.507238	0.777094	0.853813	0.284799	0.722342	0.927974	0.237668	0.776444	0.623677	0.288096	0.259825	0.572479	0.597656	0.816867	0.808668	0.204992	0.51234	0.325869	0.335564	0.99628	0.676159	0.197315	0.526348
X225481	0.00678409	0.960832	0.235294	0.357546	0.0311973	0.746967	0.688165	0.678477	0.859563	0.895175	0.992487	0.045821	0.0347366	0.326151	0.744494	0.0526274	0.602379	0.103821	0.097014	0.64454	0.512991	0.132562	0.593045	0.990361	0.590106	0.857861	0.677288	0.468452	0.516549	0.381034	0.67551	0.355806	0.941464	0.930713	0.806427	0.897618	0.877283	0.624456	0.135828	0.609889	0.948997	0.480935	0.356646	0.397961	0.465587	0.450823	0.561861	0.235442	0.15974
X225387	0.779377	0.33882	0.737728	0.523469	0.282018	0.234677	0.216437	0.572681	0.165453	0.273318	0.464092	0.526695	0.983609	0.566695	0.906237	0.627013	0.162982	0.709906	0.970366	0.373119	0.0265171	0.437037	0.752398	0.210257	0.10023	0.0759593	0.604592	0.161406	0.338128	0.292093	0.352191	0.626832	0.918739	0.259441	0.0627723	0.760629	0.784869	0.00828757	0.424589	0.585005	0.407679	0.178432	0.97915	0.485507	0.532482	0.236295	0.652162	0.0608095	0.820663
X225283	0.0253973	0.606092	0.91998	0.567136	0.764797	0.417203	0.428465	0.512463	0.344018	0.560716	0.56181	0.436451	0.865622	0.941591	0.460506	0.071381	0.904819	0.993467	0.425501	0.405836	0.667096	0.723411	0.79227	0.443542	0.586493	0.775519	0.472279	0.582408	0.604098	0.21274	0.039646	0.198831	0.55536	0.950535	0.297525	0.342376	0.454889	0.787513	0.486514	0.496874	0.840203	0.794004	0.476351	0.683618	0.00878536	0.736053	0.883234	0.915857	0.737266
X224859	0.0136517	0.542002	0.687679	0.95753	0.0762263	0.781385	0.605117	0.113112	0.964632	0.403336	4.97e-06	0.310415	0.013557	0.219658	0.00766437	0.72719	0.365916	0.198347	0.159545	0.803195	0.38837	0.170166	0.881903	0.86349	0.573441	0.889205	0.791567	0.223247	0.575944	0.0113398	0.935144	0.0987163	0.188566	0.428705	0.122034	0.40657	0.0974988	0.219886	0.265996	0.585392	0.318972	0.123528	0.405421	0.121776	0.996592	0.138188	0.835145	0.186375	0.275807
X224843	0.308004	0.456248	0.287371	0.490841	0.264388	0.232268	0.159871	0.308459	0.729321	0.791205	8.92e-30	0.0343817	0.95813	0.472368	0.0221768	0.0869983	0.0936472	0.131584	0.590434	0.758713	0.67933	0.383978	0.858106	0.10572	0.152456	0.234949	0.0221901	0.543282	0.418161	0.248474	0.809795	0.527456	0.122216	0.305324	0.971366	0.590279	0.834747	0.683186	0.452924	0.1743	0.923402	0.419018	0.996105	0.79925	0.268032	0.105176	0.822924	0.0774654	0.95395
X224790	0.387033	0.0190424	0.731946	0.0335093	0.13292	0.358844	0.158365	0.188368	0.0305741	0.018726	0.000727266	0.602703	0.605218	0.220848	0.517349	0.58944	0.860582	0.252304	0.312005	0.5922	0.212524	0.854446	0.952722	0.394479	0.558006	0.641394	0.375349	0.505884	0.59289	0.518035	0.105696	0.358422	0.25348	0.28645	0.489124	0.255109	0.36447	0.305249	0.878554	0.865435	0.807055	0.640362	0.279588	0.368129	0.783383	0.022337	0.0887715	0.00601467	0.467982
X224644	0.591131	0.823297	0.923556	0.616768	0.713445	0.269366	0.902693	0.368759	0.378727	0.982606	0.630224	0.830925	0.908544	0.947014	0.282595	0.346423	0.874249	0.236181	0.408185	0.855449	0.132046	0.834352	0.804698	0.35929	0.0819816	0.0394587	0.392176	0.64471	0.715387	0.107429	0.319489	0.528974	0.949967	0.410211	0.00418174	0.774657	0.102577	0.508657	0.0768361	0.210058	0.411458	0.000949382	0.931856	0.252884	0.881866	0.0158738	0.0029595	0.827588	0.767022
X224633	0.237189	0.708278	0.669992	0.323941	0.957227	0.742818	0.047193	0.679166	0.905756	0.515095	3.35e-13	0.741138	0.606826	0.257075	0.789799	0.83604	0.0868921	0.986024	0.562806	0.268039	0.199753	0.730354	0.444265	0.27041	0.868693	0.595792	0.239864	0.190766	0.267949	0.384413	0.926731	0.512152	0.208521	0.884429	0.321757	0.928651	0.535998	0.597657	0.534042	0.152553	0.34856	0.561743	0.782399	0.473097	0.779992	0.9976	0.417873	0.836424	0.922528
X224627	0.58844	0.0980601	0.980142	0.809289	0.189859	0.399352	0.411497	0.565426	0.828583	0.581417	0.229171	0.930989	0.000975546	0.00494921	0.764475	0.567921	0.411243	0.907994	0.633351	0.505036	0.149775	0.896466	0.863563	0.558302	0.964722	0.654367	0.817083	0.994105	0.182836	0.702192	0.0944236	0.403754	0.103303	0.202004	0.880047	0.962987	0.999771	0.162172	0.803511	0.0160854	0.662348	0.734034	0.559166	0.716591	0.691782	0.143403	0.0897844	0.18795	0.873306
X224616	0.747858	0.891921	0.819239	0.681478	0.921596	0.666991	0.272462	0.424548	0.725461	0.717757	0.381128	0.323248	0.198658	0.396872	0.154177	0.802696	0.537545	0.7949	0.124892	0.0468463	0.316317	0.298098	0.176642	0.0212153	0.286048	0.471935	0.0303121	0.402437	0.535138	0.0454732	0.364462	0.158964	0.182453	0.00456584	0.77309	0.166828	0.240164	0.599956	0.609306	0.170934	0.0301036	0.188532	0.0608936	0.10732	0.970841	0.394132	0.458765	0.657485	0.0847236
X224574	0.00444735	0.0933556	0.797253	0.903151	0.984481	0.634112	0.0621664	0.446641	0.852365	0.506102	1.24e-13	0.712771	0.0104956	0.258498	0.530246	0.410991	0.0129507	0.674392	0.11071	0.125439	0.26724	0.856837	0.866043	0.249545	0.224886	0.0894889	0.331898	0.459769	0.374874	0.0755989	0.0346753	0.41215	0.924125	0.753706	0.809551	0.430135	0.517151	0.83065	0.0327019	0.64507	0.397263	0.677892	0.787215	0.840287	0.0430825	0.0372866	0.541194	0.845091	0.0680727
X224571	0.120166	0.567918	0.263401	0.00903214	0.30831	0.0850647	0.674246	0.00822178	0.286008	0.403544	1.33e-23	0.419019	0.168311	0.740872	0.386391	0.554878	0.905891	0.184295	0.568984	0.245077	0.384655	0.74625	0.908202	0.115574	0.439828	0.427764	0.0349981	0.178594	0.150951	0.885345	0.349739	0.41256	0.0610846	0.203067	0.146239	0.835045	0.25396	0.224479	0.0988031	0.383249	0.207495	0.164773	0.854613	0.32136	0.164067	0.0716249	0.99405	0.261023	0.834881
X224551	0.66615	0.366032	0.259934	0.567074	0.191335	0.6192	0.449347	0.261969	0.825283	0.355207	0.00156369	0.95405	0.260786	0.570624	0.406548	0.858517	0.05625	0.259821	0.12873	0.211733	0.628128	0.0472393	0.0323425	0.906997	0.336127	0.579757	0.3685	0.325392	0.597002	0.241558	0.809753	0.349957	0.881134	0.913132	0.0683711	0.395243	0.858315	0.0424057	0.954707	0.247845	0.375146	0.0661051	0.242674	0.905005	0.511447	0.554314	0.201897	0.812163	0.238462
X224035	0.860576	0.821784	0.186781	0.476582	0.594729	0.672963	0.59975	0.903458	0.62931	0.287662	0.000212832	0.096829	0.507776	0.929886	0.430014	0.787836	0.679861	0.136278	0.930698	0.302612	0.574226	0.626977	0.827624	0.106999	0.0315381	0.249368	0.46522	0.354547	0.431588	0.200099	0.583846	0.599574	0.837988	0.381802	0.567163	0.799321	0.484454	0.136438	0.736939	0.444364	0.261117	0.511867	0.910688	0.892469	0.882118	0.397582	0.137103	0.481717	0.526178
X223938	0.837683	0.234485	0.314442	0.135042	0.4934	0.756761	0.865472	0.367859	0.351895	0.367454	0.843636	0.37725	0.685149	0.909394	0.0304125	0.938086	0.729605	0.996194	0.439853	0.936876	0.779276	0.59144	0.795481	0.0329259	0.275665	0.0338725	0.33432	0.0890254	0.911814	0.0333769	0.566114	0.595873	0.0504324	0.123554	0.457716	0.0876274	0.139028	0.864884	0.648498	0.197683	0.222357	0.99277	0.0396886	0.0577338	0.233121	0.0535282	0.496095	0.678266	0.609586
X223597	0.60761	0.564643	0.706526	0.86832	0.696157	0.375066	0.681496	0.0892691	0.778192	0.634487	0.0815344	0.433587	0.782471	0.366826	0.231783	0.0885769	0.951051	0.839674	0.363372	0.19071	0.817166	0.372294	0.631937	0.78676	0.20777	0.798963	0.624254	0.640561	0.413541	0.466441	0.470536	0.243816	0.343088	0.607625	0.93716	0.422244	0.627249	0.492514	0.889879	0.0601106	0.883912	0.659263	0.212032	0.308219	0.31096	0.673448	0.650644	0.259969	0.333375
X223531	0.0296562	0.0642048	0.398669	0.808437	0.0142363	0.467659	0.23883	0.899859	0.134599	0.981336	8.77e-31	0.092289	0.0628893	0.40461	0.0250166	0.819163	0.0521087	0.599498	0.485518	0.967889	0.0845048	0.963364	0.7212	0.335927	0.178585	0.430412	0.560672	0.918548	0.123281	0.130992	0.955071	0.297937	0.239213	0.171753	0.453585	0.992543	0.811463	0.121882	0.000272403	0.0140344	0.0026462	0.273991	0.94485	0.899391	0.909192	0.862162	0.693632	0.528381	0.0308797
X223521	0.257002	0.504594	0.0960173	0.482424	0.0732061	0.353989	0.137112	0.639478	0.793915	0.791441	0.027783	0.615588	0.456055	0.78043	0.489852	0.762477	0.984165	0.522963	0.595652	0.711707	0.737171	0.422702	0.312771	0.138326	0.967446	0.864138	0.936138	0.899649	0.899806	0.645171	0.748695	0.646766	0.97951	0.262326	0.787162	0.536818	0.884945	0.942071	0.691871	0.674992	0.257933	0.923411	0.370717	0.516752	0.980678	0.432442	0.884939	0.922363	0.897442
X223501	0.382175	0.162376	0.668998	0.631793	0.351317	0.616917	0.582774	0.447565	0.580509	0.97154	3e-10	0.145031	0.822224	0.13882	0.279209	0.320164	0.578372	0.816259	0.726797	0.51662	0.0705806	0.712827	0.587087	0.642998	0.171905	0.954016	0.400028	0.150365	0.216895	0.438148	0.352245	0.863322	0.885636	0.0589193	0.294706	0.584132	0.33866	0.0358548	0.566792	0.27089	0.0214233	0.498698	0.325043	0.226576	0.378877	0.356096	0.830471	0.178419	0.891257
X223500	0.226689	0.813495	0.0135572	0.713927	0.11127	0.0704782	0.239642	0.436011	0.355839	0.803175	1.39e-07	0.445188	0.119911	0.833873	0.469479	0.179879	0.356506	0.12173	0.136074	0.685019	0.574132	0.324239	0.793687	0.822585	0.703025	0.529198	0.925671	0.76691	0.207583	0.119294	0.557952	0.902656	0.785152	0.889187	0.319307	0.660802	0.573916	0.068314	0.409497	0.405074	0.213171	0.113321	0.929753	0.668284	0.872841	0.801063	0.200122	0.88862	0.231346
X223120	0.54323	0.0768324	0.336411	0.420452	0.981995	0.222981	0.415991	0.0175536	0.0210201	0.0813903	3.28e-14	0.369134	0.855115	0.272984	0.921813	0.241458	0.474379	0.661599	0.10411	0.0998105	0.682342	0.370927	0.703063	0.116778	0.172601	0.234577	0.651427	0.233583	0.920362	0.475687	0.466036	0.393825	0.644116	0.986598	0.583526	0.484029	0.56019	0.79081	0.943416	0.313136	0.892342	0.972749	0.613454	0.450861	0.527368	0.130336	0.169056	0.49946	0.147183
X222199	0.667865	0.81079	0.596792	0.336714	0.270324	0.95762	0.581428	0.267871	0.18499	0.092756	0.630965	0.406814	0.780825	0.732445	0.980697	0.115273	0.660462	0.457023	0.503373	0.445064	0.371867	0.665074	0.0554932	0.65073	0.53058	0.0203933	0.119592	0.042874	0.0370209	0.769068	0.21276	0.281636	0.438559	0.000503655	0.226593	0.516386	0.567636	0.711101	0.621697	0.185262	0.0764064	0.66746	0.601873	0.745046	0.268204	0.93827	0.964591	0.900117	0.876702
X222169	0.951063	0.921797	0.257066	0.0926432	0.204106	0.413858	0.932508	0.912749	0.484957	0.247646	0.101296	0.258975	0.274087	0.868339	0.341591	0.963144	0.287336	0.835916	0.213673	0.737199	0.151479	0.462234	0.616859	0.778431	0.544984	0.291779	0.516601	0.320724	0.684967	0.836858	0.397248	0.838245	0.751718	0.645247	0.784144	0.227851	0.63846	0.213036	0.140677	0.81416	0.352279	0.464534	0.312959	0.483919	0.40541	0.577346	0.725321	0.0683688	0.767727
X222115	0.396347	0.291624	0.062513	0.145106	0.17033	0.201527	0.470532	0.682456	0.854771	0.789405	0.0335036	0.313424	0.214305	0.424641	0.516605	0.688638	0.452573	0.295315	0.526137	0.725257	0.877768	0.886848	0.83733	0.466345	0.410073	0.380585	0.561298	0.818497	0.945257	0.496717	0.519239	0.571113	0.946519	0.0582979	0.158692	0.918472	0.626209	0.0175874	0.525644	0.438231	0.0961698	0.121742	0.791903	0.6095	0.629494	0.339853	0.876592	0.806985	0.738013
X222099	0.0384647	0.15893	0.881932	0.0203534	0.877634	0.678828	0.151107	0.934037	0.972101	0.79152	0.000111662	0.0175182	0.0173623	0.469162	0.690357	0.0804	0.366132	0.646875	0.345974	0.940904	0.867614	0.56715	0.470162	0.439623	0.315599	0.476441	0.302085	0.0345016	0.754975	0.0568639	0.170797	0.75995	0.338225	0.971982	0.439493	0.852251	0.947243	0.594328	0.0192233	0.21452	0.0512336	0.155659	0.745927	0.815104	0.286885	0.889461	0.270828	0.0875838	0.0854942
X222036	0.645873	0.203786	0.333083	0.720177	0.74467	0.93848	0.521352	0.48089	0.976132	0.687991	0.423676	0.0422752	0.517819	0.537281	0.611751	0.0236194	0.231516	0.34608	0.150582	0.843097	0.833785	0.375075	0.791151	0.958958	0.974858	0.0337332	0.323467	0.666541	0.675429	0.00860886	0.737802	0.86034	0.176706	0.342454	0.830005	0.293084	0.288229	0.810035	0.904749	0.399265	0.176539	0.255913	0.609056	0.507255	0.369183	0.859545	0.493501	0.964397	0.824464
X222029	0.000545695	0.868177	0.367629	0.0637909	0.99906	0.116867	0.198404	0.309545	0.685211	0.408825	3.79e-17	0.167092	0.887045	0.694714	0.133283	0.497606	0.656157	0.0239354	0.250155	0.997629	0.165666	0.711021	0.981922	0.0586663	0.0908908	0.280399	0.882677	0.751244	0.580896	0.541043	0.762952	0.78807	0.996644	0.125013	0.483264	0.77861	0.514614	0.857766	0.377562	0.393543	0.382976	0.570115	0.946565	0.973921	0.863364	0.228772	0.642679	0.261162	0.0962452
X221670	0.91806	0.629352	0.106876	0.815838	0.626035	0.193468	0.248856	0.542268	0.549102	0.72439	0.879636	0.386455	0.823826	0.928528	0.419248	0.0871664	0.489364	0.84843	0.424902	0.80547	0.631254	0.898477	0.754186	0.624604	0.751937	0.826015	0.89303	0.372927	0.439945	0.761137	0.610413	0.181585	0.736682	0.933088	0.50928	0.769852	0.907452	0.341628	0.967218	0.724066	0.415333	0.699191	0.649197	0.532162	0.678147	0.872329	0.622254	0.430037	0.196953
X221569	0.958663	0.664938	0.618794	0.789394	0.343883	0.71215	0.733336	0.600051	0.363166	0.776784	6.91e-14	0.872062	0.731714	0.99193	0.382516	0.603348	0.629371	0.171637	0.494657	0.535183	0.383155	0.604194	0.946807	0.130713	0.0734293	0.449698	0.296088	0.143539	0.380626	0.73341	0.255144	0.755828	0.75313	0.28041	0.356431	0.0445403	0.212153	0.226544	0.908836	0.37313	0.301534	0.065757	0.0451737	0.149191	0.937917	0.193997	0.484816	0.406222	0.82974
X221568	0.47296	0.224535	0.320342	0.512569	0.198935	0.950424	0.879625	0.820192	0.797608	0.771797	8.26e-08	0.52798	0.00382017	0.814636	0.0879316	0.378627	0.118444	0.697248	0.955899	0.849087	0.322	0.138777	0.326727	0.98354	0.00441919	0.566314	0.978047	0.467594	0.861146	0.432871	0.751873	0.614924	0.635559	0.97802	0.619491	0.344163	0.164212	0.0425909	0.384051	0.908553	0.820529	0.156134	0.272143	0.181133	0.0654507	0.0431144	0.318616	0.29026	0.0907608
X220233	0.00212636	0.189215	0.690266	0.525778	0.102176	0.0427935	0.52097	0.0457333	0.895993	0.471748	1.95e-05	0.700521	0.136545	0.532725	0.900686	0.514295	0.00325994	0.845414	0.426242	0.612565	0.0122555	0.439358	0.158389	0.237942	0.837847	0.483817	0.554908	0.675668	0.565403	0.00340753	0.0316543	0.662954	0.322698	0.00604158	0.349824	0.805961	0.995531	0.0203579	0.222199	0.74854	0.0438907	0.338885	0.489651	0.885096	0.443814	0.2586	0.619527	0.238356	0.25055
X220230	0.214422	0.0812581	0.709182	0.144731	0.0912736	0.0772493	0.185056	0.756314	0.392901	0.563516	0.673897	0.862633	0.70868	0.500642	0.0401654	0.0498538	0.0985872	0.138098	0.131745	0.905639	0.0112742	0.850419	0.258124	0.240132	0.289121	0.319269	0.937738	0.836345	0.16283	0.486778	0.113383	0.210029	0.110099	0.0269968	0.212643	0.125832	0.738869	0.0544603	0.0541366	0.0543056	0.133497	0.0590716	0.0724479	0.591758	0.973803	0.00275295	0.0307227	0.746039	0.55361
X220144	0.28458	0.877528	0.586977	0.116163	0.885616	0.991836	0.79078	0.677971	0.374644	0.314254	0.000679389	0.994497	0.5424	0.437159	0.976893	0.307576	0.795552	0.73327	0.735679	0.741227	0.135283	0.63776	0.83724	0.508269	0.944328	0.352015	0.313739	0.649386	0.621796	0.493494	0.227433	0.259097	0.453351	0.107074	0.213616	0.298421	0.862482	0.758804	0.0863627	0.611085	0.0418057	0.376697	0.226508	0.637796	0.427982	0.855662	0.866083	0.275339	0.858231
X220143	0.0464431	0.0140284	0.566645	0.666348	0.0619042	0.456305	0.805065	0.051281	0.454437	0.0861041	0.0967388	0.873016	0.535899	0.75313	0.063027	0.680945	0.355332	0.651945	0.507315	0.590014	0.297909	0.358038	0.927347	0.0599113	0.449912	0.448393	0.507146	0.501351	0.423247	0.460136	0.797331	0.0418659	0.00942114	0.0918508	0.961629	0.156932	0.240845	0.136727	0.11048	0.480264	0.329822	0.585052	0.104883	0.168011	0.128619	0.145974	0.380948	0.634615	0.516879
X220103	0.0665983	0.223775	0.501775	0.498993	0.804502	0.680951	0.100098	0.440381	0.610665	0.642598	7.48e-08	0.362001	0.285856	0.295603	0.224682	0.671801	0.664212	0.272144	0.90034	0.852126	0.271234	0.537916	0.359872	0.912814	0.839955	0.655485	0.196024	0.361947	0.710655	0.942165	0.693419	0.209218	0.795091	0.00328197	0.848418	0.806619	0.602403	0.727783	0.319252	0.0461427	0.00430959	0.304878	0.372357	0.300676	0.79434	0.579142	0.707664	0.513403	0.321751
X220015	0.00447885	0.107035	0.031666	0.47844	0.161734	0.0930571	0.942623	0.104328	0.938207	0.978025	1.46e-26	0.0510519	0.266787	0.784266	0.943318	0.432375	0.55561	0.853586	0.992721	0.644943	0.119305	0.534091	0.773376	0.715608	0.517135	0.250874	0.075112	0.359044	0.338612	0.739173	0.392334	0.965768	0.301695	0.317607	0.564427	0.340553	0.22328	0.25989	0.206798	0.108299	0.155902	0.71806	0.314047	0.178721	0.488016	0.856264	0.364179	0.852195	0.477676
X220011	0.0915538	0.556915	0.58902	0.767377	0.919506	0.534406	0.801902	0.20675	0.196955	0.222411	0.00757477	0.88429	0.870176	0.236465	0.0093256	0.543897	0.729301	0.861673	0.695026	0.594202	0.576543	0.72197	0.99366	0.0644749	0.0335593	0.813966	0.698341	0.830147	0.79777	0.422132	0.915071	0.365128	0.279283	0.868332	0.358429	0.690322	0.586973	0.152115	0.545883	0.126749	0.248034	0.269363	0.833463	0.977125	0.885939	0.579701	0.352916	0.455548	0.446159
X220009	0.88006	0.873508	0.857272	0.400794	0.678155	0.654895	0.278911	0.388714	0.43846	0.416786	1.54e-21	0.0988004	0.347691	0.141797	0.824362	0.645584	0.284557	0.984695	0.457624	0.671441	0.109281	0.0368899	0.159014	0.582406	0.785415	0.853478	0.933943	0.682169	0.676581	0.35523	0.254877	0.909326	0.444855	0.781671	0.90275	0.905661	0.816783	0.433398	0.0626973	0.0508788	0.233122	0.809435	0.900276	0.917698	0.448818	0.181342	0.412508	0.231683	0.0767758
X220005	0.00564721	0.878845	0.832563	0.010889	0.171435	0.0777111	0.491114	0.258219	0.503138	0.289109	3.21e-19	0.149165	0.473426	0.745152	0.592844	0.151754	0.208685	0.914516	0.767559	0.809343	0.168015	0.494039	0.96172	0.432922	0.484903	0.339848	0.919324	0.90874	0.478859	0.849894	0.174419	0.816876	0.62349	0.034747	0.120105	0.496186	0.232521	0.0768253	0.199739	0.6538	0.00479207	0.123173	0.398156	0.220304	0.193065	0.358873	0.422565	0.810609	0.536359
X219032	0.00948477	0.0734393	0.0531535	0.512023	0.023918	0.980409	0.846547	0.393805	0.594205	0.659705	0.534406	0.77337	0.767293	0.986806	0.753399	0.205273	0.644634	0.450278	0.47375	0.865337	0.655838	0.340478	0.527866	0.447261	0.916901	0.804172	0.119851	0.915597	0.10735	0.195755	0.202224	0.799109	0.383931	0.58815	0.607146	0.402652	0.15237	0.822635	0.763722	0.945225	0.1501	0.859775	0.539439	0.456573	0.281615	0.0967242	0.363566	0.762128	0.937027
X219021	0.605911	0.175412	0.668641	0.0293489	0.0342324	0.023852	0.0549278	0.23403	0.57402	0.886353	3.63e-32	0.377049	0.230444	0.111298	0.405175	0.375962	0.567853	0.662846	0.700657	0.601282	0.506135	0.848286	0.901464	0.997069	0.327684	0.743019	0.421602	0.355659	0.312226	0.922707	0.322753	0.343398	0.34811	0.42212	0.992355	0.399293	0.232478	0.178452	0.256784	0.781752	0.563983	0.158361	0.121214	0.321885	0.419849	0.881599	0.365838	0.883234	0.451551
X218860	0.0209947	0.814369	0.0984938	0.286311	0.00568277	0.604599	0.516004	0.224424	0.305584	0.370239	0.283062	0.246423	0.7875	0.954712	0.154981	0.427031	0.76011	0.382503	0.535067	0.805903	0.015763	0.96724	0.705102	0.396621	0.733374	0.593945	0.0404742	0.343875	0.414193	0.610687	0.68173	0.391621	0.49078	0.168025	0.866121	0.0999042	0.132918	0.990754	0.414882	0.706086	0.0854631	0.553434	0.0709166	0.110594	0.149507	0.997305	0.454622	0.180211	0.280482
X218835	0.033192	0.746478	0.156889	0.138435	0.973511	0.242818	0.39305	0.182725	0.074288	0.0221857	0.591169	0.991536	0.5322	0.0669578	0.646632	0.731656	0.966936	0.458827	0.86687	0.477051	0.768456	0.719106	0.596172	0.258338	0.357727	0.310834	0.893644	0.727536	0.631334	0.985714	0.0997091	0.043783	0.0564156	0.010817	0.859862	0.282831	0.241546	0.5444	0.258205	0.791748	0.687325	0.456784	0.127576	0.185291	0.263777	0.968027	0.200501	0.995828	0.531887
X218798	0.44416	0.648438	0.0240727	0.413005	0.401623	0.230323	0.941277	0.224087	0.627558	0.701143	1.54e-10	0.303982	0.086902	0.429653	0.0891915	0.373572	0.258273	0.925383	0.972464	0.888826	0.0831368	0.23957	0.0991687	0.333844	0.273656	0.646478	0.941062	0.304799	0.0550915	0.547572	0.613318	0.286154	0.766723	0.327558	0.77151	0.709593	0.803901	0.493156	0.646421	0.368311	0.568775	0.323347	0.754857	0.557114	0.384989	0.463407	0.745048	0.962038	0.299008
X218795	0.516312	0.606095	0.714714	0.829564	0.754843	0.151112	0.759596	0.568216	0.279919	0.352087	1.13e-09	0.450844	0.627971	0.400568	1e-05	0.00384901	0.164954	0.824809	0.755641	0.472345	0.403637	0.0187011	0.192215	0.144178	0.385306	0.494134	0.927925	0.408591	0.905069	0.975366	0.166206	0.157819	0.893278	0.237714	0.585037	0.875568	0.950102	0.614684	0.149443	0.763433	0.148536	0.89881	0.612213	0.609609	0.341224	0.147075	0.207731	0.269535	0.542341
X218787	0.799805	0.00525461	0.563857	0.244421	0.0185383	0.703623	0.252233	0.459837	0.451706	0.273485	0.226115	0.0326786	0.226161	0.978383	0.601968	0.217323	0.785272	0.507078	0.372935	0.886127	0.14706	0.421402	0.0164796	0.932842	0.332686	0.330223	0.454672	0.839373	0.763386	0.0732824	0.791403	0.686226	0.100994	0.485456	0.245978	0.803824	0.78926	0.264839	0.202928	0.177787	0.883807	0.836605	0.290032	0.329744	0.56451	0.290769	0.705336	0.218399	0.389142
X218768	0.000177325	0.743469	0.313424	0.415126	0.22993	0.369408	0.953421	0.663546	0.601393	0.175793	0.000716859	0.266507	0.900611	0.894138	0.487482	0.669018	0.786972	0.750285	0.610743	0.910347	0.541224	0.802707	0.932042	0.418681	0.518326	0.839985	0.0965865	0.688394	0.732229	0.426147	0.499206	0.94892	0.51574	0.62642	0.255808	0.647616	0.195518	0.998972	0.719078	0.921864	0.67012	0.177611	0.619667	0.367836	0.329732	0.482276	0.566636	0.614939	0.923897
X218767	0.0200746	0.362986	0.144287	0.703939	0.00289996	0.712017	0.385196	0.18877	0.264785	0.750831	1.39e-06	0.798967	0.387696	0.656907	0.608804	0.832244	0.717637	0.0638084	0.064627	0.570966	0.0545593	0.869302	0.363843	0.704967	0.294778	0.424978	0.809141	0.563058	0.446809	0.560024	0.824601	0.911709	0.760901	0.628939	0.648275	0.868264	0.665496	0.205254	0.893777	0.984291	0.134071	0.797281	0.993084	0.980368	0.191207	0.965166	0.66603	0.208511	0.253317
X218759	0.110697	0.283964	0.160807	0.292364	0.315995	0.525424	0.737536	0.461385	0.3221	0.279914	0.0739726	0.294499	0.907657	0.36737	0.00660252	0.70071	0.14895	0.661606	0.154369	0.0311679	0.216625	0.0255058	0.0618254	0.703287	0.258654	0.633989	0.882796	0.908591	0.843341	0.669929	0.499912	0.794857	0.00953751	0.528864	0.607768	0.51785	0.18263	0.0908681	0.0218954	0.836172	0.142779	0.290265	0.910757	0.468605	0.820957	0.0052249	0.163654	0.077898	0.14353
X218739	0.921569	0.0568063	0.395437	0.230319	0.959171	0.925415	0.619695	0.621762	0.156002	0.639632	3.55e-05	0.42341	0.921875	0.871657	0.17031	0.716354	0.0645055	0.246041	0.537705	0.8401	0.190385	0.494491	0.0671015	0.670332	0.737007	0.497798	0.928165	0.996065	0.918885	0.344202	0.871864	0.860449	0.391799	0.643315	0.0759046	0.779414	0.443349	0.32741	0.38171	0.531589	0.16731	0.399156	0.655927	0.198246	0.148532	0.229585	0.818929	0.766355	0.436927
X218728	0.751382	0.333152	0.059036	0.48389	0.0121181	0.511827	0.898271	0.00908958	0.384781	0.625205	1.1e-19	0.644513	0.296155	0.71707	0.32622	0.542541	0.212852	0.13855	0.273631	0.89744	0.203178	0.205191	0.969994	0.0492012	0.192863	0.829363	0.0378087	0.324879	0.837363	0.328533	0.863276	0.506101	0.849962	0.26683	0.368165	0.895209	0.729137	0.283403	0.321784	0.989743	0.236821	0.948116	0.825565	0.693505	0.656313	0.211796	0.8158	0.93323	0.896765
X218710	0.725965	0.954203	0.0927145	0.0190252	0.321277	0.974178	0.0724368	0.132926	0.962114	0.389417	3.57e-10	0.484118	0.298311	0.138184	0.63221	0.485222	0.819048	0.657132	0.790922	0.506235	0.540133	0.692324	0.979105	0.513366	0.918786	0.841637	0.464276	0.506852	0.242041	0.752096	0.678949	0.965274	0.796116	0.55699	0.390562	0.7901	0.375936	0.91871	0.381352	0.558924	0.418596	0.212888	0.585275	0.212942	0.287881	0.412384	0.444048	0.963347	0.513654
X218708	0.115903	0.519806	0.282524	0.699142	0.302322	0.645891	0.869954	0.083331	0.00675983	0.0119055	0.329887	0.812031	0.759191	0.83517	0.0666944	0.922681	0.764829	0.362669	0.909282	0.582144	0.397398	0.278521	0.614366	0.959612	0.593999	0.353598	0.408697	0.322005	0.185436	0.331433	0.33918	0.452577	0.740168	0.450518	0.912049	0.333833	0.60486	0.338016	0.0112137	0.133529	0.30851	0.418235	0.255952	0.362742	0.916925	0.0094561	0.214102	0.129983	0.0916127
X218702	0.00360969	0.343443	0.598993	0.390223	0.026516	0.454644	0.695904	0.443687	0.760489	0.789666	9.9e-18	0.375728	0.618478	0.539245	0.00871351	0.749541	0.368361	0.252438	0.526224	0.618962	0.243988	0.571187	0.743569	0.198629	0.8721	0.074633	0.150965	0.602062	0.149394	0.534583	0.540863	0.370378	0.613722	0.0399808	0.470155	0.826331	0.952374	0.0662986	0.0979647	0.560662	0.183069	0.233602	0.159391	0.382154	0.87112	0.220124	0.0186106	0.161273	0.241181
X218699	0.507959	0.753361	0.511094	0.161918	0.0366074	0.298202	0.309932	0.960796	0.798255	0.87868	2.85e-05	0.0356616	0.127534	0.0634671	0.484895	0.122629	0.343718	0.572914	0.97322	0.163954	0.178977	0.0575537	0.521	0.504876	0.464725	0.593176	0.997171	0.0975357	0.0289048	0.880591	0.00717881	0.0725901	0.887877	0.74401	0.176805	0.0229567	0.130693	0.560741	0.0707154	0.953721	0.222976	0.331256	0.193016	0.321129	0.539189	0.310283	0.839644	0.643857	0.556109
X218693	0.935107	0.776751	0.467698	0.223827	0.700712	0.0553585	0.00227268	0.873705	0.905742	0.942006	4.61e-26	0.252191	0.998739	0.165327	0.906942	0.710562	0.796209	0.00549533	0.00399564	0.143882	0.649686	0.277439	0.598961	0.942954	0.346973	0.503734	0.512171	0.201747	0.454205	0.365171	0.0939972	0.420857	0.127594	0.750008	0.0482192	0.13727	0.32545	0.793311	0.435366	0.595045	0.92598	0.20099	0.201286	0.426181	0.726765	0.335952	0.933323	0.780177	0.0700164
X218688	0.25037	0.737352	0.722079	0.0299559	0.975214	0.118281	0.0798859	0.64245	0.482808	0.397934	0.000357031	0.885583	0.227811	0.7254	0.162743	0.740037	0.075498	0.430796	0.204641	0.446533	0.940099	0.890405	0.947195	0.586467	0.661709	0.30744	0.685789	0.403561	0.384212	0.503001	0.665319	0.422586	0.96023	0.762526	0.313613	0.618611	0.460019	0.10839	0.308752	0.643767	0.841648	0.969962	0.41581	0.52903	0.51437	0.528338	0.547396	0.932428	0.54607
X218687	0.564359	0.0136315	0.0813284	0.79986	0.225681	0.477193	0.270274	0.480903	0.549436	0.328687	2.84e-05	0.975282	0.299866	0.563171	0.164532	0.730557	0.663189	0.531512	0.814013	0.879205	0.158882	0.745169	0.0851289	0.28574	0.735818	0.317334	0.933436	0.898689	0.499286	0.677293	0.514272	0.900221	0.888906	0.26794	0.365141	0.572978	0.405914	0.422439	0.611009	0.450209	0.537112	0.166425	0.674243	0.398259	0.707221	0.624238	0.176338	0.888484	0.239705
X218683	0.23775	0.583519	0.276442	0.201123	0.0276945	0.967609	0.135284	0.341863	0.193597	0.441688	6.85e-16	0.570453	0.0624516	0.015131	0.13706	0.165996	0.394583	0.171043	0.455281	0.721109	0.285719	0.0219217	0.0239326	0.0110302	0.225956	0.0885773	0.201543	0.342198	0.417078	0.580284	0.492535	0.362638	0.187502	0.00290735	0.20435	0.152581	0.0477956	0.228666	0.194519	0.911997	0.00316239	0.256716	0.226745	0.052627	0.0198328	0.930036	0.0400229	0.554382	0.509488
X218681	0.648802	0.98084	0.537427	0.702992	0.941279	0.00329616	0.23279	0.073826	0.112395	0.157071	0.0706061	0.0936601	0.595235	0.941795	0.435814	0.107231	0.97495	0.867983	0.475385	0.261097	0.699969	0.678553	0.680658	0.845825	0.771225	0.873631	0.929156	0.594425	0.465882	0.64442	0.939203	0.780602	0.892098	0.9239	0.143795	0.0657663	0.376481	0.946925	0.260634	0.489921	0.933899	0.25139	0.0265647	0.186593	0.287576	0.783433	0.558123	0.970737	0.13043
X218615	0.977028	0.0387785	0.144429	0.12362	0.520664	0.538779	0.644678	0.763859	0.702697	0.815691	0.0125936	0.52675	0.799902	0.896916	0.000483324	0.177864	0.0298537	0.595009	0.785476	0.376257	0.96114	0.347192	0.195308	0.0485035	0.27114	0.0586524	0.253179	0.22472	0.207565	0.332233	0.949229	0.124034	0.646687	0.315957	0.517477	0.842392	0.877378	0.016492	0.881043	0.519002	0.659603	0.367996	0.739919	0.692453	0.0660713	0.985983	0.342065	0.880025	0.118271
X218556	0.0610228	0.249379	0.333514	0.614163	0.0506493	0.0428664	0.0811581	0.86531	0.842099	0.430226	0.00480751	0.355953	0.265264	0.215186	0.480888	0.678202	0.973933	0.881258	0.827914	0.649785	0.35231	0.787613	0.972192	0.420821	0.825542	0.768109	0.539483	0.431919	0.536101	0.321271	0.870033	0.250239	0.0403786	0.52091	0.0725781	0.856413	0.757645	0.044821	0.0609593	0.48828	0.687455	0.360896	0.821699	0.828444	0.635535	0.890072	0.0156639	0.951999	0.180341
X218550	0.54353	0.184803	0.604964	0.957509	0.579012	0.0243514	0.368294	0.0449767	0.693787	0.121087	0.709044	0.806037	0.476433	0.65713	0.102387	0.833061	0.426811	0.358147	0.883007	0.836127	0.695426	0.968527	0.682229	0.974785	0.41519	0.522274	0.626173	0.0676817	0.149302	0.100492	0.0453408	0.867891	0.59113	0.961906	0.590623	0.771265	0.584147	0.598265	0.315421	0.635924	0.76237	0.558925	0.98474	0.667436	0.199054	0.118814	0.914084	0.636134	0.0847865
X218520	0.855009	0.506315	0.324027	0.529059	0.0774897	0.492806	0.214604	0.532171	0.308418	0.30252	0.563772	0.558419	0.0741045	0.132458	0.363547	0.628918	0.61569	0.726605	0.0451353	0.0419949	0.417059	0.848177	0.142095	0.159538	0.0554362	0.534256	0.388475	0.288719	0.220964	0.108844	0.0827564	0.00566099	0.918499	0.690708	0.184355	0.352311	0.650745	0.456812	0.0077063	0.595206	0.912106	0.0168087	0.0990435	0.532684	0.604629	0.777777	0.89024	0.645806	0.458398
X218513	0.348506	0.809322	0.31907	0.981558	0.373898	0.161556	0.774986	0.222568	0.262706	0.809206	0.0065385	0.0895757	0.478163	0.313578	0.899525	0.584314	0.442942	0.840782	0.106637	0.0351752	0.229493	0.154959	0.448616	0.196918	0.219259	0.688689	0.746612	0.485681	0.874424	0.122578	0.746819	0.357836	0.250268	0.642692	0.395822	0.212223	0.233806	0.585895	0.45453	0.644471	0.986215	0.379812	0.200448	0.250796	0.396028	0.362686	0.413518	0.519313	0.473046
X218467	0.0309349	0.427	0.968001	0.204165	0.153501	0.982568	0.931036	0.814103	0.841707	0.38212	0.0468301	0.875975	0.565481	0.222766	0.00811043	0.915697	0.163364	0.970151	0.719688	0.400953	0.206867	0.302018	0.505753	0.937176	0.97012	0.150685	0.750143	0.676789	0.761438	0.436979	0.712043	0.764433	0.0609295	0.774034	0.335346	0.682479	0.898877	0.406951	0.106815	0.96343	0.780805	0.127154	0.288627	0.754975	0.487223	0.0216434	0.144737	0.522881	0.93213
X218447	0.725592	0.27401	0.705352	0.194051	0.839475	0.908905	0.35231	0.0527468	0.249978	0.610885	1.47e-14	0.196546	0.959935	0.748222	0.77358	0.847661	0.509865	0.0498485	0.430634	0.777855	0.449469	0.0190337	0.239921	0.603259	0.254411	0.817598	0.729377	0.96341	0.988803	0.0942166	0.677461	0.833748	0.186501	0.946102	0.0716631	0.590777	0.868201	0.159733	0.660344	0.0537177	0.423032	0.580095	0.796069	0.798332	0.747757	0.630385	0.187274	0.232761	0.234222
X218441	0.841679	0.10211	0.164623	0.000695062	0.4389	0.0524665	0.234865	0.974114	0.606061	0.87789	9.75e-05	0.767272	0.602054	0.719015	0.106421	0.801407	0.15241	0.17168	0.100476	0.0227187	0.44477	0.0288419	0.0920701	0.0797971	0.27251	0.520523	0.306117	0.092366	0.529433	0.532117	0.211412	0.920849	0.133751	0.755742	0.627729	0.335038	0.415683	0.991811	0.210711	0.404803	0.396812	0.433018	0.221501	0.545805	0.988457	0.315717	0.372699	0.300963	0.142115
X217870	0.0113753	0.186035	0.999527	0.00178677	0.279878	0.167327	0.995643	0.12819	0.990394	0.934282	2.54e-18	0.206195	0.475331	0.268081	0.546691	0.498477	0.478815	0.160384	0.358445	0.658352	0.0964316	0.685437	0.691432	0.978102	0.843844	0.706826	0.923663	0.740278	0.151874	0.859798	0.097273	0.331051	0.205531	0.0871442	0.513146	0.339313	0.33076	0.139433	0.0852095	0.464585	0.0260102	0.460462	0.181274	0.141035	0.155271	0.163307	0.924505	0.880373	0.42929
X217866	0.0278953	0.618956	0.0593554	0.0427005	0.190347	0.304374	0.525191	0.522611	0.333231	0.272983	0.0147242	0.523214	0.0963979	0.80509	0.670737	0.141579	0.625436	0.496062	0.865095	0.340795	0.851564	0.488324	0.0493997	0.982174	0.927261	0.931723	0.636194	0.364706	0.724792	0.284532	0.160754	0.686626	0.581761	0.712204	0.94025	0.298394	0.399634	0.954835	0.422303	0.861911	0.317741	0.560511	0.488844	0.474431	0.346354	0.230984	0.201118	0.321879	0.628663
X217809	0.880202	0.949692	0.527221	0.119112	0.235771	0.0809829	0.454317	0.326848	0.341158	0.446392	0.172827	0.263281	0.718767	0.511102	0.0646887	0.777653	0.245679	0.820522	0.715071	0.262526	0.0666634	0.436791	0.403371	0.703324	0.162682	0.730369	0.328917	0.680817	0.368262	0.81198	0.0294213	0.410036	0.92991	0.646689	0.199465	0.75133	0.620936	0.314596	0.833871	0.957402	0.850907	0.696016	0.905163	0.643406	0.995201	0.0960942	0.628494	0.845802	0.780722
X217784	0.00631154	0.801505	0.121246	0.23567	0.883851	0.457158	0.792632	0.0253653	0.667556	0.875279	6.75e-24	0.0250432	0.0771275	0.722932	0.38173	0.979825	0.0572333	0.532718	0.164676	0.551585	0.194283	0.265553	0.325529	0.958459	0.96912	0.147329	0.847255	0.99285	0.126727	0.970453	0.114704	0.444781	0.298515	0.152593	0.38602	0.316959	0.146216	0.529817	0.0760164	0.16026	0.188246	0.879406	0.131436	0.113055	0.0770102	0.13593	0.983352	0.528618	0.432881
X217783	0.0930992	0.428167	0.456372	0.024905	0.355281	0.829012	0.72155	0.143426	0.201121	0.413782	0.00169942	0.672186	0.199695	0.499842	0.0655241	0.779374	0.279659	0.764553	0.723343	0.419545	0.85013	0.822247	0.496024	0.80599	0.694762	0.0994871	0.045894	0.505487	0.949734	0.522228	0.230173	0.29942	0.154232	0.203621	0.657335	0.0904951	0.137253	0.748322	0.028334	0.178086	0.267366	0.623451	0.100293	0.102981	0.629064	0.882949	0.890188	0.717225	0.180171
X216880	0.975008	0.338395	0.856336	0.572012	0.756101	0.283978	0.901393	0.43238	0.184249	0.496775	0.328951	0.231098	0.0768796	0.713097	0.370302	0.42514	0.638486	0.639625	0.131909	0.0470836	0.682738	0.557267	0.209188	0.832973	0.451685	0.371094	0.446451	0.840098	0.133313	0.965932	0.633938	0.81772	0.81069	0.27595	0.367891	0.831802	0.710648	0.373242	0.393786	0.167635	0.865465	0.0353442	0.329143	0.705695	0.0140066	0.973346	0.466101	0.29632	0.999057
X216865	0.772522	0.319225	0.338009	0.411191	0.764979	0.916716	0.653298	0.319204	0.173293	0.938312	0.0282087	0.275181	0.461858	0.414358	0.413363	0.75938	0.155992	0.78023	0.961634	0.433951	0.862819	0.18149	0.320727	0.664105	0.556497	0.813737	0.88526	0.526227	0.606801	0.846618	0.566075	0.221992	0.386018	0.504666	0.851142	0.232122	0.2576	0.144758	0.801138	0.46781	0.886091	0.523582	0.0663205	0.0961554	0.254256	0.0162049	0.85495	0.450169	0.697256
X216569	0.392497	0.552159	0.686447	0.400792	0.0939361	0.764866	0.814867	0.568516	0.792741	0.56814	6.7e-09	0.0968089	0.687112	0.27132	0.614107	0.506326	0.302046	0.364113	0.605929	0.466297	0.146694	0.812445	0.233626	0.980409	0.504943	0.628049	0.872142	0.319936	0.039241	0.521001	0.676619	0.342032	0.0623991	0.70677	0.0293618	0.216293	0.784769	0.253189	0.179091	0.688576	0.639156	0.286739	0.452464	0.805788	0.834028	0.716932	0.848676	0.603875	0.215409
X216472	0.94637	0.284736	0.484275	0.032036	0.806902	0.41523	0.55689	0.143308	0.595806	0.710943	2.72e-06	0.596319	0.328497	0.161151	0.614441	0.549233	0.334416	0.0189114	0.164837	0.729754	0.204056	0.0911877	0.271848	0.990155	0.782542	0.415978	0.155291	0.613347	0.779947	0.788869	0.63655	0.275171	0.0907199	0.701559	0.365865	0.509311	0.641925	0.951205	0.532683	0.205409	0.405216	0.750084	0.446065	0.655193	0.372838	0.929178	0.213338	0.499483	0.952086
X216454	0.0349967	0.319226	0.0444185	0.0902836	0.142318	0.0922798	0.931559	0.210431	0.765084	0.786888	3.29e-25	0.429109	0.678129	0.351152	0.545487	0.810333	0.123883	0.80664	0.41427	0.985939	0.0154075	0.521751	0.747139	0.309052	0.651565	0.829812	0.530492	0.438093	0.615947	0.635602	0.379697	0.458617	0.53845	0.108616	0.449777	0.103474	0.181848	0.193779	0.0926733	0.3651	0.00800826	0.542594	0.151915	0.147235	0.22881	0.776262	0.203479	0.152378	0.891158
X216449	0.703746	0.728137	0.325524	0.734114	0.362937	0.93573	0.688452	0.312794	0.201548	0.254795	0.276151	0.815284	0.477405	0.234863	0.782539	0.70251	0.0257652	0.834775	0.82194	0.659909	0.54988	0.392269	0.262509	0.805913	0.463489	0.679203	0.983073	0.111476	0.172702	0.78328	0.349031	0.0783905	0.544723	0.77437	0.332563	0.60197	0.919994	0.730794	0.358299	0.737284	0.651567	0.375699	0.67086	0.663333	0.854787	0.998883	0.415038	0.326753	0.667759
X216445	0.642655	0.42607	0.0147349	0.0626015	0.420235	0.974274	0.407036	0.574427	0.497327	0.481842	0.18244	0.468816	0.836102	0.4672	0.265785	0.0543018	0.130248	0.95951	0.811651	0.604778	0.27973	0.357666	0.186476	0.124751	0.27675	0.907524	0.482952	0.867579	0.591688	0.0246935	0.0770534	0.56471	0.16064	0.956958	0.437058	0.253694	0.178717	0.533811	0.816708	0.665932	0.856048	0.885508	0.450616	0.506833	0.557519	0.403282	0.444413	0.168305	0.847664
X216428	0.259309	0.0707885	0.55356	0.748946	0.0169725	0.458337	0.853746	0.393067	0.380489	0.240737	6.66e-07	0.812329	0.631801	0.0983758	0.824803	0.984023	0.449684	0.496068	0.95364	0.979072	0.457968	0.66088	0.30295	0.439997	0.0101109	0.265728	0.173591	0.506006	0.930273	0.251675	0.102727	0.640721	0.0243789	0.470741	0.306656	0.437143	0.53016	0.530312	0.752247	0.0641379	0.597359	0.959312	0.217162	0.176138	0.0636241	0.345373	0.598339	0.7329	0.644008
X215445	0.563125	0.17909	0.752001	0.196299	0.211503	0.793696	0.413785	0.145855	0.62509	0.4406	0.0175077	0.757243	0.135951	0.120358	0.280836	0.835084	0.58561	0.798332	0.162722	0.281223	0.640501	0.668907	0.845699	0.383221	0.755339	0.889	0.115737	0.576996	0.901834	0.519302	0.846797	0.900479	0.644192	0.639552	0.11224	0.242765	0.654356	0.345291	0.364258	0.932013	0.404117	0.29977	0.191375	0.437339	0.482652	0.645673	0.718111	0.495707	0.105451
X215062	0.0211366	0.427597	0.00216358	0.128425	0.292459	0.613996	0.618538	0.523757	0.659026	0.874228	8.6e-05	0.270172	0.0573378	0.495592	0.751988	0.827113	0.68805	0.355454	0.144722	0.520219	0.946066	0.993817	0.693718	0.34991	0.991087	0.903628	0.756913	0.401566	0.466692	0.958131	0.202861	0.821708	0.569911	0.0256818	0.292449	0.137102	0.432905	0.251889	0.833242	0.466915	0.232208	0.253053	0.225862	0.392043	0.572098	0.870015	0.141111	0.842698	0.857445
X214537	0.499395	0.817404	0.875474	0.0694524	0.317524	0.071197	0.762125	0.693769	0.983174	0.881612	0.000745439	0.200373	0.266969	0.281795	0.39127	0.995615	0.0791387	0.791101	0.381938	0.474441	0.348448	0.824736	0.14206	0.407593	0.859402	0.921661	0.466252	0.591865	0.476824	0.537377	0.672796	0.956423	0.422898	0.36689	0.685303	0.790558	0.771165	0.178269	0.288605	0.98259	0.206562	0.633634	0.658698	0.623656	0.406515	0.3831	0.20517	0.815142	0.698242
X214402	0.73111	0.0623763	0.468218	0.495286	0.696237	0.728125	0.563842	0.511688	0.743174	0.787097	0.0361411	0.355804	0.565774	0.900337	0.594951	0.396293	0.712091	0.219617	0.726666	0.317648	0.242031	0.432125	0.605808	0.149905	0.643708	0.204397	0.755106	0.713218	0.69667	0.0644068	0.559614	0.970765	0.67089	0.454099	0.309865	0.3467	0.172726	0.206923	0.728183	0.216372	0.325418	0.981665	0.459201	0.253203	0.0689541	0.583103	0.107286	0.729238	0.767741
X214011	0.907926	0.276165	0.923707	0.388415	0.340026	0.592996	0.550107	0.475216	0.908878	0.382029	0.00198075	0.983314	0.785937	0.155844	0.774625	0.636015	0.458293	0.660798	0.567084	0.446202	0.912778	0.538518	0.725416	0.838786	0.279917	0.827654	0.291427	0.0115364	0.0586174	0.983772	0.356878	0.177652	0.561808	0.861338	0.105438	0.894505	0.559723	0.692802	0.805313	0.839432	0.372249	0.252224	0.322716	0.239238	0.516978	0.798913	0.576357	0.114877	0.870743
X213783	0.00425228	0.548477	0.089938	0.00238445	0.93291	0.0212648	0.176473	0.00415899	0.0329989	0.0576966	4.5e-06	0.491053	0.308991	0.968738	0.210358	0.215238	0.591577	0.388693	0.072074	0.0478012	0.557754	0.343238	0.485343	0.624415	0.849918	0.0245273	0.24804	0.659286	0.576606	0.483339	0.000934527	0.0553313	0.0428438	0.379767	0.991491	0.971901	0.457326	0.22247	0.193318	0.0170435	0.255431	0.607098	0.581351	0.796703	0.362341	0.99088	0.342372	0.301975	0.730663
X213730	0.281086	0.0382706	0.382884	0.186596	0.487122	0.11557	0.815238	0.29901	0.874919	0.653988	0.195632	0.419945	0.46478	0.879561	0.704714	0.0944979	0.851041	0.688443	0.753735	0.492837	0.480059	0.142042	0.153054	0.50946	0.549577	0.895169	0.130392	0.0585319	0.567661	0.288129	0.708401	0.546566	0.82931	0.389591	0.613266	0.986947	0.954113	0.198582	0.597991	0.902532	0.188542	0.150609	0.442927	0.655236	0.496501	0.0433448	0.558919	0.969236	0.200449
X213720	0.095598	0.32097	0.0803586	0.156542	0.130292	0.450491	0.640912	0.688356	0.0596711	0.0921285	0.42588	0.468114	0.485496	0.582926	0.857256	0.197227	0.722409	0.717858	0.152791	0.521623	0.444701	0.877088	0.755486	0.968064	0.342263	0.171633	0.638222	0.525925	0.938784	0.833512	0.363615	0.182037	0.446753	0.989862	0.473643	0.782075	0.535515	0.566313	0.637284	0.921066	0.0809147	0.481526	0.798367	0.533837	0.989695	0.235426	0.455916	0.523246	0.579753
X213697	0.00672152	0.281402	0.556197	0.0247456	0.10758	0.122722	0.803513	0.454202	0.118497	0.229472	0.308374	0.971957	0.0151292	0.327288	0.212996	0.454482	0.227016	0.322976	0.521503	0.655242	0.0375326	0.816127	0.360932	0.175071	0.0930581	0.190822	0.263099	0.892786	0.891697	0.591157	0.154016	0.333324	0.368976	0.0194516	0.800153	0.782436	0.81387	0.000737638	0.0350418	0.708668	0.0457331	0.38222	0.585697	0.944128	0.096561	0.409432	0.275329	0.626766	0.98071
X213526	0.716596	0.108754	0.282704	0.409732	0.0329577	0.716607	0.0462367	0.653432	0.252676	0.333783	3.55e-09	0.231796	0.343226	0.0597293	0.896013	0.484427	0.150196	0.292258	0.705659	0.490235	0.134852	0.679951	0.837529	0.790739	0.738378	0.0251741	0.0432649	0.89961	0.440581	0.558893	0.126563	0.140678	0.259199	0.0929078	0.340979	0.417568	0.54266	0.846482	0.500795	0.889916	0.322982	0.698005	0.593191	0.689019	0.931316	6.64e-05	0.812266	0.957026	0.398696
X213324	0.785849	0.821611	0.909693	0.00379521	0.135965	0.0386451	0.731521	0.853155	0.541082	0.478585	0.000682762	0.935876	0.900003	0.274378	0.341368	0.964445	0.515056	0.944833	0.498206	0.336105	0.819732	0.892825	0.822798	0.697045	0.99596	0.180702	0.463209	0.285135	0.673805	0.945113	0.176435	0.58196	0.518162	0.200234	0.539684	0.697598	0.712918	0.265815	0.795686	0.752549	0.475053	0.91806	0.440329	0.516749	0.588196	0.734278	0.861027	0.751098	0.241302
X213318	0.505177	0.803498	0.239098	0.633348	0.400997	0.199429	0.83618	0.436719	0.0798869	0.108747	0.201933	0.174383	0.629659	0.75675	0.143677	0.408	0.467818	0.884495	0.309195	0.247021	0.0153837	0.684793	0.365218	0.724689	0.263475	0.901739	0.401655	0.951508	0.251698	0.815206	0.316447	0.725972	0.332909	0.297093	0.599414	0.0363733	0.0546137	0.659643	0.889686	0.997515	0.196244	0.503498	0.0553158	0.101058	0.569591	0.0818967	0.217633	0.127831	0.0845936
X213243	0.885665	0.0128402	0.470153	0.833668	0.370961	0.885103	0.605429	0.33205	0.775469	0.996937	9.53e-16	0.807909	0.29222	0.246004	0.317825	0.325737	0.564262	0.00151269	0.00917789	0.178693	0.970253	0.00205241	0.0365926	0.816589	0.116598	0.885732	0.305686	0.915481	0.443259	0.0255528	0.40307	0.216522	0.0373971	0.998662	0.123895	0.969462	0.833092	0.304393	0.39897	0.209891	0.920877	0.31203	0.608457	0.959351	0.423748	0.711197	0.0362047	0.969057	0.172154
X213182	0.860315	0.940924	0.413157	0.735167	0.573544	0.16333	0.345766	0.411808	0.474672	0.552974	5.27e-07	0.682552	0.164999	0.0829114	0.110706	0.146741	0.0994436	0.0684884	0.310693	0.909944	0.366225	0.644349	0.839411	0.606513	0.328801	0.786743	0.0536473	0.951759	0.935783	0.674485	0.28616	0.167976	0.677206	0.168716	0.958183	0.372868	0.295866	0.818142	0.58665	0.494412	0.819119	0.390982	0.419478	0.306107	0.300358	0.227726	0.698516	0.75965	0.208635
X213160	0.204017	0.660585	0.220139	0.746851	0.906096	0.241114	0.760741	0.742221	0.537686	0.502157	0.53872	0.760121	0.769978	0.642555	0.033029	0.790583	0.0471149	0.525545	0.588919	0.0810698	0.107467	0.517739	0.408993	0.487253	0.407619	0.638515	0.515377	0.914718	0.856307	0.750203	0.819816	0.943186	0.794206	0.0415781	0.716368	0.525714	0.468332	0.377493	0.600805	0.967051	0.425585	0.262546	0.432324	0.347219	0.32469	0.853114	0.163721	0.0800942	0.763358
X213149	0.289766	0.065961	0.350909	0.945393	0.80204	0.242605	0.314125	0.865913	0.855938	0.244858	0.00622663	0.836682	0.197037	0.578254	0.094019	0.498199	0.708754	0.027056	0.820202	0.161214	0.659941	0.0651937	0.04782	0.743901	0.639988	0.389839	0.789371	0.63601	0.935181	0.253948	0.173927	0.76788	0.690631	0.928791	0.06762	0.276983	0.641769	0.203385	0.753056	0.667004	0.672526	0.311457	0.606473	0.822524	0.517916	0.198873	0.119085	0.0130763	0.0225337
X213005	0.374342	0.718639	0.285	0.61692	0.588829	0.181225	0.336308	0.514467	0.243808	0.499746	0.00518532	0.252065	0.962858	0.737114	0.299281	0.990349	0.27782	0.954073	0.606634	0.710604	0.309453	0.477357	0.755923	0.893412	0.172711	0.365772	0.759929	0.531135	0.658427	0.441771	0.273097	0.851821	0.899652	0.551405	0.5776	0.0461643	0.0891082	0.807089	0.8649	0.955785	0.152235	0.373213	0.0240375	0.0772836	0.306819	0.654392	0.0704776	0.0953182	0.0327516
X212748	0.00636388	0.109366	0.90764	0.935681	0.46264	0.736048	0.93905	0.083981	0.286411	0.905177	1.09e-19	0.701943	0.662886	0.678251	0.00255025	0.678156	0.612529	0.294439	0.0529853	0.223147	0.0577895	0.0127727	0.0701972	0.14491	0.0520075	0.0926633	0.569013	0.146145	0.199101	0.0106521	0.997245	0.133327	0.0459564	0.488351	0.130054	0.848322	0.635717	0.39754	0.157228	0.0988459	0.738113	0.658229	0.571219	0.786171	0.280745	0.905847	0.324738	0.0960103	0.429036
X212646	0.359391	0.601374	0.441355	0.181028	0.13998	0.496639	0.196354	0.78866	0.579227	0.38968	2.3e-10	0.327243	0.46536	0.280288	0.0729233	0.279795	0.507344	0.843002	0.940073	0.938214	0.762109	0.637166	0.591383	0.413581	0.376503	0.699026	0.243629	0.273263	0.584087	0.829051	0.493815	0.26694	0.891854	0.0548809	0.217705	0.632343	0.717125	0.213787	0.837923	0.201893	0.112708	0.136874	0.354116	0.262473	0.925811	0.172916	0.0950186	0.537096	0.122541
X212612	0.514978	0.894548	0.214395	0.863623	0.379824	0.579273	0.375115	0.155724	0.425793	0.345859	0.00196097	0.599298	0.732547	0.0894769	0.539672	0.660188	0.157871	0.260269	0.393409	0.0310673	0.753865	0.744289	0.989399	0.93983	0.890431	0.810893	0.652543	0.358394	0.623629	0.46327	0.174106	0.873586	0.839517	0.143385	0.462048	0.726281	0.884801	0.837569	0.62801	0.837056	0.0273863	0.583428	0.9116	0.631414	0.576392	0.0478871	0.263343	0.475497	0.178921
X212576	0.362426	0.633576	0.274684	0.99394	0.916817	0.0464958	0.925928	0.445157	0.706397	0.683663	1.75e-10	0.733246	0.837676	0.925722	0.155162	0.56991	0.596358	0.289472	0.260718	0.334758	0.00947343	0.583454	0.624676	0.597857	0.768299	0.630381	0.444446	0.272856	0.65739	0.25422	0.832483	0.226155	0.522413	0.197575	0.677367	0.977996	0.875505	0.0287983	0.571637	0.477407	0.605989	0.658638	0.468259	0.872576	0.758512	0.75467	0.411051	0.868095	0.749847
X212391	0.579057	0.882369	0.594231	0.0684448	0.964392	0.105595	0.205755	0.795554	0.922475	0.958833	0.00174139	0.484832	0.761727	0.646632	0.797392	0.386143	0.160861	0.128105	0.352384	0.938422	0.375617	0.0383683	0.0795553	0.886106	0.548311	0.246995	0.0984071	0.249786	0.369481	0.282985	0.17668	0.960328	0.148511	0.577777	0.578327	0.988973	0.843816	0.781257	0.419241	0.0113227	0.720952	0.20066	0.739232	0.84563	0.948308	0.53187	0.528254	0.715063	0.785581
X212373	0.901268	0.933011	0.165821	0.114968	0.303521	0.473442	0.547273	0.713356	0.713972	0.356437	1.31e-05	0.873921	0.642581	0.751341	0.302303	0.459234	0.117965	0.173306	0.0388028	0.137559	0.516786	0.571592	0.75278	0.668286	0.34063	0.121943	0.931651	0.252982	0.2573	0.492296	0.81056	0.780359	0.517504	0.236875	0.197554	0.7687	0.989533	0.78669	0.0570648	0.674011	0.263822	0.0775292	0.604406	0.865212	0.325331	0.302664	0.188601	0.426073	0.464965
X212303	0.208953	0.167485	0.905106	0.63084	0.416141	0.346755	0.0348954	0.325498	0.304629	0.573563	2.31e-22	0.317873	0.142474	0.438909	0.0874952	0.440841	0.5567	0.712853	0.537307	0.568563	0.13999	0.920168	0.675298	0.386916	0.675398	0.389994	0.609313	0.328712	0.767965	0.64924	0.768383	0.988546	0.686895	0.821509	0.138342	0.556054	0.937315	0.786576	0.253112	0.548906	0.993732	0.0187605	0.958912	0.696811	0.489838	0.569511	0.79399	0.938866	0.226647
X212282	0.836768	0.216949	0.104098	0.0884928	0.919549	0.505553	0.0231805	0.320849	0.646191	0.723723	2.19e-09	0.514124	0.316085	0.993685	0.590262	0.602888	0.174527	0.173217	0.358122	0.352934	0.771235	0.315669	0.139086	0.309055	0.484339	0.528064	0.753332	0.535904	0.621783	0.494728	0.436278	0.784287	0.150407	0.518216	0.17417	0.271812	0.0719063	0.749534	0.387003	0.377181	0.260684	0.188834	0.195086	0.089195	0.944091	0.392934	0.608697	0.406767	0.0506391
X212261	0.77258	0.141164	0.54403	0.630552	0.790531	0.0170523	0.146979	0.0614654	0.275281	0.332731	9.51e-15	0.23895	0.0890443	0.874495	0.728119	0.333741	0.668677	0.0901252	0.193652	0.623397	0.519963	0.0575708	0.321886	0.128203	0.288932	0.27823	0.818571	0.28677	0.730021	0.0519061	0.463776	0.570352	0.364493	0.801247	0.208788	0.532086	0.843671	0.580864	0.143557	0.485463	0.88924	0.34063	0.558337	0.596766	0.812419	0.428559	0.139001	0.546337	0.372224
X212208	0.496221	0.149944	0.489483	0.124903	0.291129	0.227986	0.622933	0.134201	0.1535	0.534928	0.0843997	0.0930518	0.936129	0.778102	0.969657	0.725506	0.942465	0.977533	0.287477	0.46767	0.228389	0.517705	0.74179	0.252781	0.663091	0.589764	0.735909	0.0552035	0.412042	0.935901	0.290759	0.369224	0.926475	0.811738	0.308018	0.469741	0.047608	0.16777	0.265927	0.188118	0.445699	0.516651	0.201694	0.052546	0.871594	0.495466	0.508726	0.83477	0.381303
X212181	0.0622129	0.870241	0.880155	0.548633	0.252782	0.0555267	0.614998	0.298453	0.405501	0.801666	0.809396	0.0567302	0.860817	0.124356	0.489475	0.39615	0.0218174	0.610206	0.49491	0.973351	0.953595	0.553553	0.637753	0.445394	0.0689017	0.495212	0.674293	0.250869	0.562213	0.527072	0.649529	0.446583	0.0221367	0.870564	0.617854	0.0698425	0.0409232	0.989077	0.88547	0.605982	0.323816	0.7053	0.0475788	0.0967332	0.379879	0.381991	0.919629	0.83011	0.840004
X212022	0.937692	0.0914394	0.533945	0.640894	0.00936235	0.792403	0.987836	0.662313	0.977049	0.766259	0.413487	0.19751	0.779534	0.652664	0.606944	0.606217	0.419806	0.273119	0.114206	0.477609	0.561841	0.502583	0.275004	0.638619	0.596283	0.750854	0.977074	0.864647	0.596312	0.254107	0.608736	0.443269	0.542153	0.699081	0.693268	0.963074	0.8285	0.4383	0.636023	0.542068	0.272386	0.676308	0.449118	0.407053	0.742805	0.128311	0.406555	0.0102476	0.273368
X212009	0.246073	0.330436	0.0461152	0.0749036	0.260165	0.0648367	0.348699	0.501906	0.664789	0.866671	1.12e-10	0.365274	0.149961	0.619624	0.175274	0.427241	0.407633	0.269456	0.60923	0.0507864	0.130174	0.354813	0.885915	0.376319	0.759832	0.559612	0.580308	0.0607984	0.0462835	0.751497	0.125107	0.492859	0.0694166	0.733565	0.216824	0.344761	0.424941	0.196231	0.669791	0.697824	0.188589	0.403454	0.440782	0.425423	0.932767	0.979387	0.770032	0.199079	0.0160952
X211991	0.674136	0.210381	0.839266	0.943781	0.541101	0.0707011	0.200193	0.0264919	0.510532	0.609912	7.71e-08	0.697406	0.219239	0.434887	0.998712	0.670444	0.589897	0.966013	0.864937	0.986973	0.747659	0.405692	0.580365	0.0457346	0.851276	0.290498	0.21138	0.59629	0.457453	0.195341	0.675506	0.569817	0.463202	0.698238	0.159318	0.672627	0.953141	0.509421	0.890757	0.54703	0.170205	0.32722	0.880062	0.697569	0.866705	0.316465	0.295564	0.53857	0.883025
X211982	0.422176	0.748921	0.639696	0.974412	0.596657	0.858099	0.39139	0.841944	0.476364	0.497494	0.00553746	0.680157	0.478824	0.390496	0.678684	0.667623	0.819708	0.761114	0.539184	0.472673	0.882814	0.507786	0.41943	0.508965	0.882623	0.594583	0.930824	0.979318	0.654854	0.804013	0.657446	0.571805	0.747846	0.379211	0.751301	0.397982	0.489739	0.657731	0.35408	0.311856	0.592605	0.705634	0.292503	0.234663	0.224676	0.0652405	0.281964	0.775162	0.736304
X211980	0.808262	0.2514	0.0917345	0.685401	0.527717	0.308425	0.937997	0.208144	0.389098	0.367816	0.000895638	0.80141	0.477481	0.72835	0.52342	0.997916	0.827309	0.415129	0.671198	0.56912	0.74674	0.326181	0.52196	0.662938	0.914068	0.73449	0.896653	0.222963	0.656633	0.0364161	0.507096	0.955456	0.259247	0.754188	0.868699	0.759506	0.506952	0.945288	0.892221	0.859125	0.658689	0.464032	0.785458	0.629448	0.899754	0.161249	0.28199	0.619767	0.255609
X211978	0.0316612	0.0349904	0.974196	0.0135485	0.21823	0.0258182	0.120989	0.569933	0.288315	0.306554	0.174909	0.855062	0.0441033	0.221157	0.081605	0.0958628	0.351045	0.31861	0.109456	0.627086	0.15013	0.879245	0.43437	0.256083	0.123	0.139781	0.104038	0.467616	0.369908	0.372197	0.0141596	0.221662	0.0874813	0.0553455	0.487776	0.221809	0.521659	0.0890585	0.00623014	0.0447937	0.390784	0.097404	0.285191	0.644714	0.923385	0.00350395	0.019086	0.603093	0.612184
X211965	0.227138	0.208463	0.519126	0.493644	0.0265328	0.911434	0.704919	0.581937	0.125409	0.191164	0.158351	0.679501	0.651001	0.956902	0.624804	0.469009	0.660206	0.709311	0.556069	0.76594	0.58159	0.532827	0.327299	0.59499	0.878564	0.33031	0.841338	0.485166	0.377593	0.846603	0.345146	0.142252	0.412818	0.778358	0.15632	0.122376	0.550038	0.281294	0.931833	0.870884	0.788109	0.931589	0.240466	0.504876	0.187492	0.460512	0.461496	0.535205	0.899389
X211961	0.255637	0.266613	0.807797	0.520422	0.12864	0.371661	0.745959	0.435482	0.128539	0.541958	4.39e-11	0.976858	0.338322	0.678862	0.14083	0.489284	0.394734	0.490257	0.609716	0.320081	0.892413	0.0617817	0.107647	0.19842	0.537714	0.917151	0.666891	0.64841	0.720527	0.531028	0.631395	0.83676	0.896537	0.496802	0.252736	0.565791	0.83515	0.525149	0.0626019	0.124735	0.141953	0.0577777	0.374599	0.607645	0.301469	0.25552	0.529892	0.668238	0.316355
X211956	0.0292047	0.190509	0.158958	0.899504	0.0151383	0.462447	0.864457	0.0244189	0.666361	0.0970863	0.571573	0.504727	0.835821	0.973493	0.0126169	0.00454684	0.809528	0.0655896	0.726771	0.573397	0.0864753	0.8779	0.910754	0.476151	0.202938	0.987701	0.277995	0.700164	0.706506	0.430936	0.483294	0.0255246	0.049981	0.688669	0.196794	0.0623509	0.0257991	0.971673	0.000792281	0.0975651	0.757662	0.413499	0.0411999	0.0397538	0.258401	0.60384	0.270835	0.0155788	0.028572
X211949	0.0203142	0.142743	0.346494	0.235989	0.898052	0.256425	0.340902	0.505146	0.897254	0.810132	5.3e-08	0.579624	0.691337	0.379701	0.00883619	0.809404	0.378481	0.369211	0.801303	0.183479	0.669073	0.063697	0.450536	0.238914	0.981394	0.225602	0.30191	0.0181072	0.0215046	0.215587	0.794241	0.265373	0.133485	0.0306297	0.932925	0.466182	0.895997	0.919226	0.0124366	0.378987	0.178763	0.967433	0.367745	0.919645	0.43454	0.0339555	0.00280107	0.942197	0.598338
X211946	0.178762	0.109765	0.160187	0.378645	0.951711	0.450821	0.622038	0.0951996	0.521384	0.908697	0.269427	0.585853	0.17174	0.461951	0.0603949	0.352913	0.763444	0.363976	0.819604	0.473556	0.377945	0.394999	0.707195	0.375563	0.82837	0.698708	0.75156	0.381665	0.229206	0.382256	0.578413	0.571104	0.45473	0.219657	0.384031	0.8959	0.554494	0.857324	0.635067	0.952363	0.190614	0.704653	0.259199	0.458486	0.666442	0.314399	0.641264	0.162289	0.858115
X211945	0.754668	0.192973	0.836023	0.466643	0.820129	0.662835	0.673407	0.657708	0.811405	0.500759	3.83e-05	0.249635	0.286011	0.682232	0.274087	0.974106	0.717088	0.776028	0.600796	0.408192	0.29535	0.187481	0.1316	0.59849	0.993117	0.93337	0.787715	0.0245836	0.0842502	0.309314	0.917763	0.183148	0.00805014	0.549563	0.352204	0.589892	0.488113	0.599435	0.148458	0.0648342	0.833119	0.574536	0.348682	0.248861	0.867365	0.57326	0.255567	0.567597	0.186534
X211932	0.860754	0.010959	0.895152	0.695915	0.604676	0.121674	0.83075	0.0646378	0.473499	0.0324685	3.87e-05	0.651186	0.078945	0.439011	0.590929	0.719313	0.0906891	0.0891567	0.577642	0.482267	0.47383	0.21967	0.189439	0.22835	0.618998	0.397168	0.467796	0.834751	0.699195	0.69812	0.519547	0.500472	0.138465	0.64187	0.0943139	0.428247	0.116266	0.865183	0.404484	0.226125	0.0901995	0.0914348	0.393684	0.110931	0.311108	0.920853	0.706109	0.800082	0.552004
X211921	0.102451	0.866717	0.887277	0.973632	0.64316	0.947664	0.0780352	0.891087	0.406432	0.76028	0.000468499	0.0743186	0.513738	0.2995	0.8239	0.183118	0.297509	0.616773	0.483196	0.528288	0.944094	0.02443	0.522534	0.677372	0.721944	0.669367	0.888004	0.79416	0.732255	0.376985	0.674292	0.877355	0.934132	0.651279	0.45511	0.0730027	0.200075	0.855122	0.569584	0.433624	0.841424	0.573195	0.144036	0.216611	0.127018	0.969817	0.736626	0.619384	0.401637
X211917	0.909045	0.855392	0.134331	0.250069	0.95483	0.48332	0.868005	0.346263	0.863201	0.313698	0.330336	0.689215	0.99503	0.405927	0.95782	0.888301	0.121789	0.878588	0.774911	0.448796	0.685156	0.118397	0.545995	0.404289	0.21358	0.0282852	0.897897	0.878481	0.484938	0.957814	0.301678	0.714371	0.874037	0.807518	0.736549	0.776083	0.968018	0.369842	0.410363	0.66994	0.253409	0.863595	0.909628	0.839316	0.243699	0.444419	0.325606	0.228838	0.555076
X211902	0.956652	0.0621833	0.422246	0.35329	0.330003	0.00276762	0.597568	0.662892	0.109887	0.446375	0.0983783	0.653379	0.479093	0.556259	0.315992	0.862208	0.279926	0.493985	0.177798	0.0223592	0.654615	0.0138278	0.281591	0.0569252	0.613608	0.971008	0.0805409	0.316754	0.424305	0.306713	0.398862	0.37138	0.26192	0.654701	0.445781	0.213051	0.250413	0.027125	0.530259	0.107551	0.965524	0.948909	0.583423	0.663695	0.728612	0.282907	0.829918	0.308509	0.050801
X211896	0.0085226	0.550028	0.146221	0.646033	0.337542	0.229083	0.938227	0.0260026	0.0491885	0.0464167	3.09e-21	0.365153	0.330668	0.775496	0.600551	0.600122	0.122818	0.00603105	0.0931798	0.923819	0.068835	0.863129	0.430294	0.139333	0.346712	0.552097	0.611363	0.398326	0.716516	0.674538	0.742941	0.57462	0.709195	0.624086	0.159227	0.39601	0.806722	0.957217	0.807666	0.95648	0.640029	0.309056	0.849279	0.853448	0.829033	0.125847	0.670353	0.620593	0.183635
X211895	0.744742	0.879166	0.41389	0.222755	0.739259	0.9887	0.34198	0.657982	0.346464	0.998934	3.77e-07	0.117355	0.433729	0.965788	0.122909	0.35914	0.461249	0.0759398	0.0484591	0.0380585	0.387345	0.153796	0.428435	0.25615	0.910763	0.663437	0.140197	0.217456	0.188654	0.445321	0.045949	0.68312	0.495723	0.963798	0.478246	0.383005	0.0577997	0.649275	0.789495	0.602014	0.377365	0.531426	0.354714	0.13579	0.781426	0.202773	0.0259125	0.134738	0.281486
X210904	0.228802	0.119647	0.167378	0.0877906	0.421055	0.0325785	0.75504	0.0894031	0.790618	0.947794	2.76e-21	0.434262	0.096711	0.984521	0.89353	0.724936	0.316055	0.932862	0.716942	0.455385	0.066511	0.77544	0.978142	0.701158	0.544649	0.534041	0.533598	0.478414	0.401914	0.795467	0.210752	0.58017	0.57794	0.0794329	0.0518302	0.905382	0.466812	0.0085116	0.241303	0.683189	0.0920027	0.234038	0.713927	0.380501	0.727645	0.421097	0.640718	0.371183	0.735111
X210901	0.796386	0.856302	0.751678	0.749052	0.400935	0.566554	0.198399	0.0211721	0.314456	0.592738	8.67e-05	0.968333	0.855096	0.76547	0.49313	0.790593	0.715604	0.132416	0.836496	0.147775	0.367396	0.761819	0.584546	0.40695	0.603333	0.407043	0.949468	0.471055	0.186124	0.113757	0.629796	0.883414	0.429378	0.445684	0.951715	0.716937	0.84536	0.161806	0.676587	0.944744	0.443235	0.8441	0.214421	0.344675	0.417427	0.305497	0.681027	0.55048	0.635549
X210557	0.519374	0.466829	0.0506513	0.138886	0.352772	0.0403711	0.790329	0.157558	0.157607	0.930368	1.03e-05	0.124707	0.295148	0.741897	0.192142	0.508908	0.372936	0.215715	0.849601	0.545816	0.87918	0.164045	0.616917	0.205052	0.10203	0.184209	0.906752	0.537355	0.484837	0.662138	0.834963	0.617848	0.37117	0.112442	0.611384	0.357718	0.41297	0.817901	0.279389	0.706365	0.665677	0.89475	0.883331	0.93648	0.869385	0.560583	0.605555	0.580824	0.590187
X210286	0.308878	0.198122	0.558883	0.188728	0.0342218	0.833138	0.929889	0.48231	0.970048	0.517704	0.917933	0.801809	0.607895	0.993865	0.424726	0.795487	0.677804	0.115334	0.217238	0.822241	0.634483	0.702089	0.406828	0.545142	0.311257	0.199916	0.104	0.00491555	0.163013	0.312364	0.553243	0.161124	0.623921	0.0644159	0.90119	0.672119	0.671991	0.642667	0.0419149	0.248466	0.25283	0.875572	0.338532	0.514833	0.451297	0.640078	0.240224	0.12275	0.0440279
X210215	0.0667434	0.569468	0.776268	0.989933	0.806423	0.657867	0.805191	0.0761124	0.527021	0.672113	3.92e-05	0.815145	0.849737	0.234325	0.423352	0.286977	0.138011	0.0210545	0.113827	0.821763	0.875261	0.0916588	0.3988	0.500544	0.904287	0.777298	0.827648	0.729799	0.545606	0.280226	0.326953	0.172283	0.910413	0.337245	0.0103918	0.205806	0.0403721	0.406994	0.0700366	0.167338	0.618046	0.0751516	0.3873	0.163265	0.873729	0.88617	0.265851	0.720432	0.0716044
X208874	0.23992	0.0555928	0.744922	0.909255	0.542548	0.78092	0.195979	0.128203	0.821317	0.621565	0.221397	0.491256	0.742324	0.930726	0.834181	0.200056	0.339747	0.158908	0.114754	0.179401	0.629656	0.899945	0.962977	0.606283	0.0671912	0.329395	0.248285	0.66385	0.84012	0.956243	0.573714	0.0244239	0.153627	0.816053	0.397274	0.810548	0.630269	0.131875	0.216372	0.206515	0.555935	0.85823	0.426902	0.399496	0.642834	0.225944	0.313758	0.415525	0.174923
X208850	0.0209994	0.146839	0.841941	0.682744	0.0378544	0.762113	0.134989	0.720495	0.554565	0.654619	6.57e-09	0.655243	0.138739	0.0788611	0.369406	0.998433	0.871162	0.925932	0.558154	0.873628	0.0283022	0.529713	0.484674	0.38024	0.848711	0.431593	0.334638	0.257633	0.871125	0.973894	0.555357	0.675837	0.934677	0.780003	0.0328168	0.470703	0.681981	0.411292	0.0464287	0.105937	0.336161	0.247185	0.226089	0.665925	0.49302	0.562082	0.105413	0.406156	0.00837358
X208845	0.193345	0.560979	0.847053	0.618674	0.15541	0.300419	0.419884	0.187001	0.601511	0.137206	0.0187354	0.0448647	0.253321	0.785523	0.949152	0.138043	0.786567	0.635624	0.788444	0.872016	0.950878	0.878504	0.289451	0.6425	0.181645	0.513734	0.906149	0.651505	0.576535	0.114997	0.246935	0.650137	0.289596	0.979453	0.405513	0.162087	0.103026	0.816679	0.941369	0.113045	0.823483	0.639437	0.0226786	0.0578461	0.938787	0.924531	0.840439	0.472332	0.254812
X208686	0.764573	0.112468	0.731796	0.946003	0.405387	0.584956	0.362268	0.924973	0.51457	0.957347	0.23494	0.928486	0.889297	0.786974	0.0732086	0.70079	0.712413	0.800824	0.213031	0.143501	0.101461	0.271656	0.602565	0.227723	0.304557	0.232557	0.766091	0.368463	0.703888	0.0423703	0.396072	0.138344	0.333005	0.264804	0.60024	0.76265	0.874984	0.0936054	0.697145	0.0523751	0.123332	0.797316	0.60866	0.699015	0.660544	0.354496	0.769799	0.641304	0.741476
X208664	0.517021	0.158855	0.854744	0.749589	0.830724	0.779074	0.233717	0.587294	0.482702	0.895337	0.00600658	0.208433	0.663334	0.233246	0.350417	0.418409	0.558179	0.0929575	0.329989	0.629525	0.236946	0.750707	0.954216	0.210569	0.791146	0.332594	0.124361	0.339516	0.0203543	0.00240313	0.864976	0.481939	0.477176	0.56816	0.948945	0.692467	0.915517	0.781028	0.637424	0.466303	0.714733	0.513683	0.946015	0.98379	0.926297	0.854167	0.565903	0.207086	0.110835
X208655	0.111646	0.975034	0.8875	0.110329	0.666064	0.97256	0.490854	0.369474	0.954158	0.893337	4.99e-06	0.40484	0.924871	0.714785	0.541774	0.423114	0.357124	0.529216	0.640692	0.524254	0.775465	0.259899	0.461913	0.259349	0.611005	0.194777	0.455884	0.485079	0.871337	0.262366	0.71519	0.888796	0.396133	0.371828	0.204917	0.109197	0.402263	0.400321	0.565836	0.721673	0.216191	0.457286	0.104591	0.453308	0.404192	0.0990761	0.134179	0.846926	0.369366
X208651	0.48175	0.146401	0.577765	0.874577	0.939353	0.586747	0.345905	0.607474	0.900153	0.222038	0.412367	0.521835	0.966605	0.970961	0.870334	0.622525	0.140547	0.0507445	0.162919	0.714509	0.910899	0.848269	0.249764	0.495821	0.161333	0.494767	0.177751	0.715776	0.80785	0.422379	0.487774	0.800342	0.71721	0.957675	0.587677	0.660276	0.892772	0.459972	0.403584	0.808972	0.723405	0.0220417	0.146365	0.575427	0.989141	0.248225	0.363385	0.410434	0.797141
X208538	0.44545	0.668992	0.768733	0.81514	0.859359	0.750693	0.873233	0.6442	0.537912	0.733561	0.0163799	0.688755	0.40174	0.858805	0.327278	0.958016	0.828996	0.114591	0.573953	0.0378124	0.379276	0.562076	0.0674484	0.383898	0.390749	0.241909	0.275438	0.119257	0.17008	0.685196	0.78189	0.996673	0.909189	0.733004	0.46004	0.746641	0.812012	0.564491	0.683682	0.920499	0.790337	0.0837125	0.504671	0.427526	0.0454753	0.892161	0.730043	0.985113	0.40411
X208381	0.672269	0.481366	0.181183	0.472608	0.978168	0.172497	0.0241789	0.810545	0.0104439	0.010999	0.0327442	0.0530999	0.769722	0.680695	0.730492	0.152659	0.253759	0.0607463	0.131943	0.0845598	0.82996	0.0451369	0.0100575	0.566739	0.931033	0.617763	0.587528	0.438583	0.81758	0.457909	0.390045	0.506622	0.775997	0.634583	0.305084	0.791182	0.650843	0.0849994	0.0799738	0.52403	0.0453045	0.434731	0.851881	0.494915	0.817006	0.587512	0.686043	0.675623	0.507899
X207684	0.908685	0.05879	0.756039	0.34855	0.01905	0.700692	0.828394	0.043171	0.0686438	0.93897	0.0263257	0.0430786	0.368074	0.207599	0.343767	0.804667	0.14306	0.452933	0.295733	0.616711	0.111156	0.442562	0.986228	0.97332	0.989626	0.582953	0.947323	0.521024	0.849459	0.321833	0.722136	0.143932	0.0326173	0.232073	0.640357	0.324558	0.20192	0.52114	0.898884	0.493712	0.568377	0.327662	0.106031	0.123948	0.682583	0.899417	0.376784	0.397292	0.562894
X207241	0.963233	0.0162148	0.365677	0.00446253	0.420905	0.0302481	0.863277	0.644687	0.502051	0.191503	4.61e-06	0.720185	0.409384	0.232396	0.254029	0.455241	0.376944	0.0171696	0.398247	0.318263	0.849609	0.0997342	0.0542179	0.375792	0.679896	0.305989	0.0577791	0.204014	0.874961	0.912222	0.937143	0.117364	0.090362	0.190199	0.789848	0.381983	0.426348	0.514669	0.248124	0.123257	0.444307	0.744697	0.544411	0.665281	0.730774	0.852135	0.58151	0.595092	0.615547
X205672	0.366955	0.37239	0.348635	0.369054	0.0915944	0.109677	0.823933	0.203445	0.766326	0.50803	0.11951	0.317597	0.461985	0.621058	0.091174	0.0366378	0.771498	0.720119	0.425803	0.279227	0.507001	0.735724	0.591494	0.837758	0.280873	0.793518	0.241906	0.775788	0.497359	0.961566	0.931808	0.230833	0.585039	0.724867	0.770845	0.786193	0.769735	0.564828	0.63334	0.271733	0.306836	0.137476	0.369808	0.509933	0.161208	0.653729	0.795499	0.607176	0.333268
X204426	0.336752	0.349482	0.693493	0.339899	0.469974	0.413869	0.516106	0.343576	0.910291	0.989583	0.000561241	0.668362	0.886923	0.93109	0.0621116	0.426955	0.507731	0.674284	0.616698	0.514038	0.218521	0.44215	0.991812	0.175182	0.183021	0.708823	0.13752	0.190116	0.86947	0.427948	0.0713205	0.210681	0.0691115	0.363189	0.488606	0.914829	0.999697	0.493141	0.0662118	0.37215	0.586293	0.488768	0.810747	0.77626	0.823849	0.957986	0.662346	0.379597	0.973216
X204344	0.972107	0.258913	0.504403	0.527122	0.121823	0.0821508	0.752612	0.655097	0.433405	0.921591	0.0164272	0.707222	0.877392	0.767014	0.830096	0.799175	0.607092	0.689029	0.425912	0.566372	0.874543	0.47309	0.763159	0.799876	0.925282	0.840743	0.528234	0.877907	0.489057	0.753036	0.857212	0.182701	0.863975	0.970367	0.349232	0.698787	0.601015	0.466976	0.926102	0.463136	0.17457	0.793593	0.88898	0.74233	0.97932	0.8364	0.434396	0.935051	0.506918
X204157	0.541556	0.985112	0.716445	0.921303	0.220992	0.543039	0.878758	0.368631	0.964321	0.65611	3.46e-11	0.740474	0.025931	0.568935	0.0604521	0.106083	0.111152	0.12177	0.370285	0.793483	0.602966	0.0242766	0.611371	0.0529848	0.443974	0.835647	0.423262	0.974972	0.959626	0.710753	0.744015	0.219189	0.360781	0.349142	0.142529	0.362454	0.370577	0.154148	0.511251	0.940139	0.153132	0.504208	0.528858	0.582292	0.301894	0.729035	0.594275	0.976361	0.529988
X203325	0.857806	0.986729	0.246307	0.00280263	0.509403	0.0605829	0.320453	0.613482	0.255645	0.302565	1.93e-16	0.121225	0.152862	0.428571	0.581689	0.226832	0.57892	0.560419	0.956903	0.843644	0.985304	0.949821	0.542728	0.624795	0.253305	0.345463	0.568997	0.199044	0.478095	0.708137	0.768483	0.974905	0.343307	0.663753	0.506702	0.0582247	0.0377076	0.141643	0.614978	0.905389	0.397974	0.697413	0.122118	0.110118	0.94284	0.121111	0.33004	0.300664	0.765961
X203264	0.550483	0.151197	0.240307	0.405394	0.229737	0.302277	0.687746	0.137222	0.743103	0.43944	1.52e-05	0.255358	0.322012	0.681335	0.0668606	0.0394868	0.173373	0.857893	0.523237	0.646945	0.728223	0.38059	0.430505	0.115846	0.0393525	0.8548	0.0634244	0.88941	0.520397	0.167915	0.546173	0.59241	0.476773	0.703714	0.109096	0.0712713	0.367527	0.0716915	0.592541	0.44977	0.165608	0.732286	0.238923	0.585043	0.254251	0.442528	0.0188408	0.0155162	0.00368666
X203259	0.416821	0.0224963	0.426638	0.458228	0.511775	0.0214217	0.415345	0.210819	0.582627	0.320769	3.14e-10	0.536157	0.971236	0.782844	0.0560105	0.466606	0.95236	0.476886	0.795742	0.209816	0.968483	0.0192191	0.0262755	0.951559	0.499335	0.307852	0.82555	0.850213	0.723669	0.00453202	0.198703	0.403662	0.00588174	0.503652	0.390626	0.758986	0.971143	0.248049	0.34281	0.194872	0.824169	0.230584	0.261803	0.430694	0.672877	0.450826	0.589754	0.073117	0.922254
X203047	0.158653	0.871989	0.788479	0.108903	0.355388	0.161366	0.417671	0.325906	0.844308	0.979012	2.35e-12	0.647982	0.180398	0.477191	0.907305	0.662894	0.875951	0.0485671	0.732961	0.238626	0.768977	0.286092	0.67579	0.214558	0.503982	0.451011	0.984285	0.943	0.973091	0.643736	0.1218	0.296641	0.294378	0.000503811	0.296041	0.055884	0.467987	0.0492333	0.0270242	0.636895	0.0184475	0.103546	0.0506359	0.167106	0.589823	0.699966	0.512851	0.159323	0.308376
X202907	0.599547	0.881929	0.999869	0.018196	0.669548	0.288206	0.842519	0.965639	0.967002	0.384014	5.08e-06	0.144908	0.108993	0.721505	0.200987	0.741208	0.429219	0.0765805	0.126358	0.485315	0.979901	0.347785	0.134094	0.923169	0.961304	0.289118	0.371504	0.152646	0.267925	0.968931	0.396339	0.354996	0.556256	0.530961	0.667531	0.071962	0.222815	0.190046	0.895362	0.405734	0.701175	0.611179	0.0812733	0.121934	0.910732	0.640568	0.889553	0.411615	0.564952
X202834	0.816034	0.558867	0.510713	0.853316	0.443489	0.558948	0.802908	0.886585	0.277133	0.445128	0.0909255	0.560619	0.917392	0.897499	0.496561	0.605601	0.315631	0.377298	0.905025	0.292861	0.122335	0.180339	0.262694	0.0321236	0.0987043	0.3457	0.518511	0.171013	0.345784	0.514972	0.929514	0.972235	0.378362	0.250294	0.0788557	0.163762	0.434132	0.872343	0.102634	0.632297	0.00983207	0.119018	0.275444	0.173921	0.00167775	0.0293461	0.836364	0.618683	0.824847
X202687	0.130729	0.51105	0.437964	0.929508	0.473012	0.979283	0.828683	0.638565	0.725935	0.803683	0.743734	0.761008	0.948594	0.460738	0.527226	0.564939	0.543003	0.292446	0.559875	0.345693	0.847024	0.556522	0.866213	0.12555	0.0904474	0.343346	0.183695	0.678464	0.569288	0.60906	0.268862	0.329059	0.805506	0.775195	0.593326	0.283268	0.90145	0.731789	0.790473	0.971945	0.891173	0.117163	0.089054	0.417599	0.433408	0.640854	0.961964	0.319573	0.897918
X202664	0.0310825	0.383316	0.581515	0.0417178	0.978036	0.389724	0.574841	0.724668	0.718212	0.779643	2.36e-36	0.194375	0.355079	0.993007	0.530947	0.86457	0.17917	0.630427	0.312235	0.600215	0.147215	0.839478	0.378535	0.565881	0.123095	0.999073	0.125054	0.239871	0.428882	0.644888	0.329965	0.328854	0.0769874	0.330992	0.156992	0.218567	0.147292	0.174691	0.0710551	0.28438	0.16108	0.0241032	0.387106	0.155288	0.540785	0.476759	0.595975	0.23422	0.666215
X202663	0.722132	0.168695	0.497723	0.157899	0.0617466	0.957688	0.359974	0.0563617	0.561286	0.761106	3.39e-10	0.803712	0.695234	0.718686	0.921861	0.655484	0.311144	0.0571516	0.0523858	0.0729107	0.959335	0.0317453	0.915981	0.37516	0.19373	0.0528775	0.174969	0.100284	0.931532	0.105748	0.409956	0.91077	0.853006	0.0243014	0.191113	0.662178	0.922072	0.965456	0.138341	0.144705	0.429424	0.593029	0.861191	0.664978	0.217121	0.788478	0.138671	0.647552	0.613101
X202599	0.813125	0.173308	0.306187	0.594431	0.160019	0.0321386	0.473093	0.274734	0.986465	0.419499	0.00718149	0.832918	0.926053	0.93637	0.112235	0.688787	0.41682	0.47908	0.256178	0.0181905	0.879608	0.777819	0.56	0.355796	0.0311562	0.146096	0.64382	0.220691	0.0572031	0.372567	0.486569	0.196795	0.478394	0.567504	0.156753	0.146086	0.167556	0.422874	0.812142	0.665343	0.980658	0.473139	0.311058	0.414103	0.369706	0.101093	0.261935	0.415418	0.458553
X202579	0.990037	0.030181	0.801541	0.55336	0.245469	0.133127	0.753148	0.917913	0.381281	0.548123	0.0691437	0.214343	0.745552	0.507968	0.480321	0.505726	0.168466	0.393693	0.887042	0.674018	0.668704	0.551411	0.185203	0.807197	0.604213	0.479271	0.248793	0.937677	0.655583	0.0326445	0.71798	0.547643	0.175487	0.383901	0.574969	0.334762	0.366046	0.311571	0.860279	0.031732	0.649613	0.73251	0.0958991	0.0671048	0.349764	0.908847	0.268221	0.703048	0.540782
X202571	0.930921	0.125193	0.801714	0.807327	0.960832	0.134447	0.49142	0.89371	0.203453	0.457748	8.36e-06	0.75667	0.563331	0.83673	0.567906	0.945856	0.656161	0.100081	0.0205015	0.56842	0.00124	0.0306536	0.00249879	0.530313	0.0979391	0.145681	0.792809	0.99105	0.504108	0.732356	0.817719	0.75479	0.895422	0.221369	0.669489	0.643594	0.562997	0.248094	0.473559	0.205867	0.19045	0.92131	0.7214	0.927068	0.721372	0.0864846	0.776553	0.806821	0.865061
X202402	0.525297	0.314571	0.289712	0.493993	0.0735491	0.156	0.348192	0.367189	0.895905	0.565798	0.00159406	0.863285	0.588171	0.831662	0.452517	0.6035	0.164044	0.940257	0.35479	0.107507	0.00635725	0.192919	0.487011	0.438774	0.428981	0.669199	0.381226	0.936003	0.0686852	0.446702	0.0439896	0.42894	0.25854	0.281369	0.0905542	0.268547	0.905272	0.132994	0.235184	0.256362	0.948705	0.750625	0.265621	0.666986	0.896122	0.637856	0.840298	0.107237	0.03847
X202293	0.984829	0.135457	0.0662622	0.00882358	0.527492	4.64e-05	0.085181	0.782323	0.994549	0.59202	3.23e-10	0.602445	0.104184	0.643338	0.545084	0.31224	0.367005	0.620904	0.112695	0.208142	0.530261	0.0217866	0.483868	0.13982	0.73339	0.879317	0.769854	0.435122	0.847876	0.05744	0.0722631	0.211176	0.125177	0.0156729	0.620638	0.363047	0.271606	0.86946	0.00512996	0.784819	0.477058	0.176513	0.116265	0.0845099	0.046778	0.95791	0.274224	0.703422	0.119747
X202178	0.608622	0.393607	0.44422	0.814738	0.224911	0.864924	0.221231	0.986916	0.331287	0.221173	1.38e-05	0.628253	0.574103	0.219765	0.637231	0.328328	0.104468	0.613948	0.513528	0.648552	0.578217	0.143654	0.573296	0.446794	0.977743	0.39863	0.225577	0.570408	0.246186	0.243076	0.783507	0.147741	0.223216	0.324634	0.0597029	0.626945	0.870593	0.562998	0.0094421	0.483544	0.369271	0.57121	0.86922	0.985604	0.239997	0.237135	0.0973822	0.244784	0.720046
X202083	0.624312	0.0729946	0.00639401	0.00251552	0.474058	0.437822	0.722057	0.0949039	0.366811	0.597046	7.59e-07	0.257728	0.234461	0.399449	0.121114	0.933849	0.429292	0.826437	0.987658	0.513365	0.210691	0.106666	0.674533	0.4151	0.127912	0.0742926	0.965662	0.831973	0.693918	0.695106	0.0097549	0.11597	0.136372	0.0361324	0.922236	0.770945	0.719556	0.207381	0.607493	0.13173	0.0463916	0.821517	0.395443	0.356599	0.380802	0.244783	0.617766	0.193172	0.107705
X202056	0.123993	0.695589	0.748837	0.489282	0.703034	0.772526	0.657241	0.0843513	0.322647	0.665294	0.00285534	0.461861	0.0176982	0.431761	0.166862	0.0586029	0.0286708	0.816725	0.308804	0.355781	0.0630623	0.137888	0.279673	0.274165	0.471745	0.466407	0.165829	0.0662967	0.0985681	0.812534	0.768127	0.366769	0.0912851	0.909842	0.501527	0.0812073	0.31113	0.472419	0.094474	0.0788676	0.643372	0.270908	0.163385	0.216621	0.814592	0.882648	0.944439	0.11712	0.603429
X201887	0.124021	0.104599	0.454097	0.128051	0.679429	0.571935	0.351101	0.456882	0.950507	0.637503	1.52e-06	0.479676	0.929472	0.704781	0.781081	0.352389	0.66793	0.36258	0.215653	0.705143	0.349486	0.0424684	0.0485407	0.0804579	0.00235911	0.258582	0.192201	0.550933	0.252791	0.715395	0.136889	0.282848	0.281819	0.941332	0.709397	0.19336	0.130004	0.202943	0.220839	0.259843	0.622425	0.866104	0.339193	0.303382	0.241729	0.759794	0.345216	0.253683	0.951488
X201838	0.0480143	0.102285	0.29671	0.124518	0.758628	0.0458757	0.945843	0.914933	0.48543	0.394516	1.77e-07	0.564436	0.901991	0.372782	0.806934	0.399352	0.190443	0.04505	0.355714	0.698513	0.285061	0.917524	0.673297	0.571669	0.834307	0.257127	0.855774	0.495981	0.566265	0.403533	0.474005	0.926408	0.835561	0.0633597	0.423023	0.644421	0.359135	0.696077	0.27703	0.721666	0.347657	0.58133	0.778066	0.609981	0.835685	0.392984	0.901983	0.765146	0.227615
X201832	0.860708	0.255627	0.854167	0.375897	0.304203	0.111997	0.938094	0.692011	0.228791	0.813159	0.00227864	0.597274	0.54398	0.139035	0.037872	0.754304	0.680944	0.734736	0.380458	0.0912121	0.52596	0.105051	0.0423434	0.154887	0.74147	0.302272	0.160981	0.741782	0.616377	0.291134	0.801273	0.466552	0.429434	0.0549797	0.871019	0.750446	0.897642	0.12158	0.0585413	0.595193	0.0190387	0.820101	0.624477	0.700136	0.600891	0.552895	0.083278	0.280958	0.747213
X200971	0.89941	0.299155	0.989389	0.763251	0.379878	0.554266	0.298591	0.742628	0.503296	0.211104	2.52e-16	0.640515	0.128194	0.045494	0.0587527	0.393146	0.602949	0.661129	0.677975	0.649647	0.91636	0.494443	0.282828	0.293829	0.0219517	0.971136	0.336013	0.274423	0.403059	0.301519	0.534372	0.150231	0.111057	0.819854	0.134388	0.777024	0.511784	0.646268	0.888143	0.16546	0.92175	0.276388	0.360259	0.22211	0.948412	0.811921	0.950064	0.782273	0.250238
X200919	0.97796	0.602087	0.854537	0.282735	0.300644	0.282331	0.695825	0.782367	0.347387	0.79351	0.687714	0.402432	0.0251389	0.00968707	0.93111	0.854823	0.337706	0.443841	0.185313	0.655454	0.0499907	0.0251287	0.00551814	0.771051	0.653483	0.661108	0.33015	0.142376	0.536864	0.318019	0.834942	0.642208	0.529965	0.761038	0.543488	0.739115	0.880512	0.0299781	0.694141	0.621812	0.82549	0.364432	0.409045	0.597652	0.891438	0.292838	0.165039	0.0461769	0.282777
X200909	0.076114	0.214537	0.00582927	0.00119692	0.306905	0.0121571	0.431245	0.56669	0.352433	0.488259	2.44e-09	0.0758281	0.213187	0.62286	0.560993	0.802089	0.336437	0.351904	0.0465794	0.186359	0.550293	0.627148	0.614825	0.0994004	0.546009	0.62421	0.612451	0.07104	0.0339642	0.861154	0.0190714	0.521479	0.0790714	0.0138883	0.182596	0.0692001	0.25767	0.682993	0.508184	0.828622	0.442396	0.175906	0.0706904	0.128548	0.125022	0.83426	0.51786	0.423082	0.085472
X200809	0.261433	0.437689	0.139977	0.671167	0.0987934	0.557586	0.830353	0.381483	0.901179	0.959525	3.78e-12	0.548751	0.999702	0.308304	0.0158779	0.107027	0.96239	0.648532	0.803786	0.503588	0.220762	0.210686	0.311855	0.156491	0.193159	0.292687	0.616767	0.425286	0.5256	0.190226	0.925601	0.141369	0.221978	0.559389	0.984681	0.511378	0.88207	0.504566	0.727676	0.253419	0.576413	0.905359	0.405645	0.644033	0.385566	0.244057	0.231119	0.466215	0.238843
X200735	0.369049	0.0353109	0.0400582	0.155698	0.822361	0.148081	0.282877	0.00874898	0.240059	0.876423	2.23e-10	0.162341	0.756	0.633309	0.112088	0.68328	0.150103	0.13839	0.259127	0.353417	0.407882	0.295953	0.665751	0.0671766	0.591272	0.91791	0.00980797	0.0640614	0.677368	0.0220349	0.273477	0.476838	0.307005	0.0971211	0.952482	0.864273	0.944085	0.153783	0.47253	0.626925	0.357071	0.21142	0.559233	0.931087	0.170628	0.800659	0.586551	0.75905	0.888887
X200680	0.764375	0.1051	0.847358	0.245761	0.183643	0.72305	0.940656	0.307999	0.0435817	0.0512773	0.619083	0.920698	0.97371	0.578681	0.044017	0.414616	0.791747	0.591662	0.771868	0.995681	0.812915	0.426437	0.540334	0.504222	0.388232	0.701236	0.215853	0.29029	0.394887	0.819177	0.718691	0.386785	0.875335	0.586911	0.134108	0.4024	0.0578724	0.410723	0.200344	0.0886259	0.0540844	0.398998	0.0530443	0.0126787	0.0363229	0.107698	0.86519	0.768441	0.1508
X200599	0.248941	0.04779	0.108829	0.107535	0.694126	0.469315	0.209532	0.529277	0.896329	0.735052	6.37e-08	0.872066	0.354078	0.0631295	0.360659	0.900807	0.755405	0.509591	0.325835	0.424289	0.233578	0.665677	0.251359	0.606826	0.367489	0.0229979	0.132681	0.0291689	0.0220523	0.406613	0.950351	0.296071	0.663666	0.321561	0.0283474	0.921498	0.364278	0.768163	0.965162	0.844931	0.635058	0.0907217	0.799916	0.750862	0.171465	0.524764	0.436234	0.824693	0.993732
X200595	0.29954	0.277996	0.346738	0.225752	0.357505	0.59816	0.069291	0.122166	0.773191	0.34033	0.00171378	0.18188	0.0772851	0.450614	0.620015	0.239442	0.802902	0.42524	0.16136	0.925251	0.45666	0.00488757	0.422349	0.663238	0.813407	0.331445	0.0475768	0.732337	0.444605	0.887133	0.88105	0.672071	0.11389	0.584524	0.315634	0.659308	0.395684	0.161302	0.761972	0.847797	0.0282073	0.526519	0.684557	0.775732	0.781681	0.909367	0.157567	0.783672	0.788501
X200589	0.178402	0.706684	0.601928	0.433819	0.705571	0.356991	0.294638	0.553717	0.919757	0.519367	0.000319617	0.0232327	0.584956	0.641412	0.285808	0.689898	0.979406	0.3647	0.70294	0.443456	0.124043	0.803509	0.624531	0.112853	0.336127	0.871143	0.164679	0.10278	0.00374442	0.229887	0.0442662	0.275322	0.983099	0.627479	0.831323	0.624258	0.939214	0.866853	0.168237	0.589472	0.84529	0.683434	0.692747	0.818177	0.950439	0.961996	0.763097	0.312883	0.498752
X200523	0.0145805	0.746717	0.668684	0.0599965	0.0114304	0.00410606	0.0742856	0.0783385	0.171982	0.359573	2.62e-12	0.132842	0.509447	0.564876	0.309308	0.125499	0.161659	0.103116	0.0419122	0.0580527	0.309477	0.796181	0.0206472	0.393428	0.401192	0.822377	0.374224	0.304724	0.195765	0.966186	0.145359	0.716671	0.0841468	0.168634	0.417068	0.406491	0.744642	0.794833	0.470853	0.696113	0.422112	0.178045	0.497363	0.783295	0.00319486	0.949604	0.674643	0.128214	0.00865964
X200511	0.782982	0.807104	0.965109	0.0737456	0.0430382	0.719519	0.697745	0.946052	0.803297	0.967688	0.685255	0.644983	0.783275	0.463549	0.840112	0.589107	0.790117	0.701543	0.97807	0.243281	0.293523	0.751241	0.318474	0.309998	0.635051	0.530029	0.944902	0.635312	0.767035	0.511733	0.968082	0.418909	0.352892	0.19019	0.297984	0.530054	0.37554	0.706664	0.817896	0.514975	0.506654	0.629208	0.15378	0.0917123	0.775913	0.0931751	0.19089	0.912481	0.551933
X200491	0.147458	0.604111	0.0164486	0.0522406	0.390195	0.0163567	0.169524	0.790281	0.51346	0.862332	4.2e-10	0.0750767	0.423243	0.727654	0.203028	0.803744	0.0833436	0.159852	0.224487	0.580482	0.834447	0.806231	0.786849	0.210144	0.569952	0.922253	0.64407	0.794503	0.650816	0.690792	0.191759	0.98965	0.401801	0.333191	0.821926	0.340591	0.564953	0.874378	0.356565	0.9662	0.0921599	0.883757	0.900905	0.920665	0.515617	0.154887	0.349044	0.323752	0.371739
X200486	0.705163	0.38326	0.956131	0.866673	0.13067	0.680792	0.299269	0.882991	0.623966	0.564131	5.46e-08	0.548621	0.887758	0.805891	0.963875	0.935601	0.94511	0.0417637	0.111272	0.444441	0.66931	0.0241647	0.465915	0.584675	0.178554	0.525524	0.301164	0.664986	0.694949	0.100637	0.353897	0.745904	0.12296	0.348218	0.171783	0.561837	0.381647	0.716198	0.426608	0.749927	0.432631	0.885454	0.205959	0.280663	0.668481	0.473675	0.34886	0.234933	0.0992339
X200478	0.150401	0.454421	0.868503	0.874569	0.382785	0.630844	0.592468	0.69955	0.31109	0.368611	1.27e-24	0.774013	0.647976	0.345902	0.733889	0.110334	0.431896	0.158173	0.151217	0.538006	0.883571	0.264007	0.692948	0.833304	0.926146	0.900005	0.0215885	0.719647	0.219894	0.46954	0.617605	0.26003	0.416349	0.403481	0.64052	0.726421	0.558722	0.844752	0.897672	0.960023	0.329479	0.943177	0.735943	0.779006	0.694354	0.151095	0.506182	0.489143	0.0328554
X200472	0.797076	0.582478	0.168291	0.298485	0.216924	0.472909	0.613467	0.433232	0.599015	0.714186	0.709868	0.101632	0.665957	0.37463	0.180306	0.105832	0.666762	0.0857091	0.719456	0.0997238	0.90702	0.299016	0.135994	0.0896498	0.107879	0.170263	0.716738	0.928678	0.392149	0.360607	0.377631	0.199173	0.17925	0.894764	0.310792	0.32283	0.553357	0.617329	0.739328	0.130598	0.995444	0.109427	0.116445	0.402246	0.659356	0.687085	0.199226	0.353869	0.156177
X200464	0.913471	0.857241	0.977345	0.201009	0.0791377	0.91361	0.45189	0.258506	0.621513	0.334336	0.00638127	0.398181	0.301431	0.893026	0.733731	0.941363	0.27789	0.773069	0.149894	0.130318	0.387083	0.796245	0.536243	0.171746	0.721561	0.0895176	0.262046	0.634669	0.603314	0.69018	0.74776	0.344069	0.357315	0.140898	0.21076	0.620386	0.915792	0.940337	0.823246	0.854856	0.312154	0.536961	0.740087	0.915248	0.443306	0.0585087	0.984756	0.253243	0.39112
X200462	0.433012	0.250445	0.601782	0.533368	0.57915	0.843354	0.632359	0.604438	0.784053	0.931491	3.2e-17	0.275249	0.0295491	0.884125	0.4862	0.499585	0.702598	0.818206	0.740095	0.5073	0.76225	0.110211	0.970648	0.624904	0.927692	0.313586	0.0106633	0.504251	0.669215	0.884909	0.286268	0.932933	0.710571	0.187192	0.901674	0.576062	0.93441	0.574094	0.342295	0.971287	0.192016	0.991261	0.645087	0.794077	0.590028	0.91044	0.800495	0.810068	0.115803
X200457	0.387108	0.347082	0.163409	0.145867	0.908751	0.79068	0.493819	0.0331679	0.0998981	0.13132	3.49e-09	0.484365	0.886231	0.546585	0.600611	0.917273	0.127076	0.30252	0.237013	0.496718	0.631531	0.364195	0.996515	0.271701	0.329858	0.939216	0.230562	0.746095	0.175503	0.234764	0.229276	0.526084	0.736252	0.177913	0.0665162	0.145948	0.730818	0.504497	0.13463	0.639416	0.24457	0.421892	0.517209	0.782665	0.965915	0.863711	0.50908	0.494669	0.192147
X200450	0.123018	0.326811	0.00322332	0.0109046	0.976394	0.0711417	0.151704	0.675183	0.214348	0.0244994	0.11449	0.669124	0.119308	0.633029	0.918906	0.062345	0.741896	0.522363	0.083488	0.039815	0.627521	0.0239046	0.333922	0.0100431	0.0241933	0.161011	0.0389447	0.439981	0.273554	0.315339	0.127905	0.761351	0.406653	0.715125	0.304078	0.142043	0.316128	0.356778	0.609022	0.752064	0.299657	0.2083	0.338914	0.522921	0.714123	0.0907683	0.788976	0.456726	0.108953
X200421	0.3037	0.446326	0.121159	0.494567	0.378586	0.104263	0.670157	0.131562	0.636829	0.803717	1.08e-20	0.141818	0.478362	0.475804	0.316861	0.730298	0.258117	0.926727	0.587916	0.808144	0.0359576	0.846539	0.982376	0.940718	0.781241	0.194231	0.23934	0.663876	0.844269	0.710914	0.741367	0.745033	0.550286	0.177621	0.241249	0.451	0.197105	0.00651777	0.498193	0.743407	0.160336	0.786932	0.192849	0.122599	0.755679	0.653022	0.787865	0.330752	0.972651
X200411	0.381294	0.76508	0.731134	0.847517	0.386896	0.279554	0.979337	0.395149	0.625492	0.370504	0.0727436	0.246552	0.738606	0.328506	0.031549	0.571653	0.932029	0.0564545	0.23496	0.398163	0.389057	0.195047	0.275841	0.961771	0.594871	0.797296	0.394772	0.897106	0.93986	0.205019	0.952013	0.0652826	0.816614	0.677787	0.852275	0.996619	0.60155	0.501248	0.249548	0.710632	0.493262	0.984841	0.913039	0.642546	0.826908	0.312306	0.0497253	0.565915	0.814368
X200392	0.984366	0.0112641	0.109617	0.036354	0.764799	0.470142	0.964665	0.893431	0.803368	0.85394	4.76e-10	0.126811	0.36218	0.916334	0.393946	0.444146	0.27364	0.00485555	0.0296147	0.212734	0.696306	0.023951	0.119358	0.891067	0.44761	0.954337	0.930849	0.331639	0.561597	0.015342	0.589618	0.225958	0.350857	0.349236	0.432	0.751339	0.918308	0.640174	0.41985	0.115716	0.344187	0.504243	0.695876	0.807179	0.575817	0.907642	0.733663	0.527931	0.213096
X1.monostearin	0.944476	0.599015	0.0120913	0.223693	0.878361	0.533956	0.706388	0.782876	0.836397	0.240688	0.740847	0.785265	0.6418	0.26479	0.393128	0.316086	0.807757	0.473494	0.833577	0.859292	0.758087	0.0661854	0.545607	0.368123	0.903068	0.728832	0.0255886	0.0793761	0.738231	0.531984	0.337974	0.374426	0.559156	0.384075	0.868281	0.10724	0.203035	0.999466	0.96629	0.827293	0.840303	0.535533	0.0536566	0.183701	0.969031	0.309879	0.0869559	0.404452	0.440879
X1.hexadecanol	0.547607	0.0562242	0.471033	0.334902	0.817182	0.505827	0.843049	0.750639	0.338948	0.627718	1.36e-05	0.94597	0.0443419	0.392511	0.033872	0.55473	0.245372	0.36564	0.85263	0.316636	0.0897893	0.175198	0.96611	0.240469	0.0186289	0.0454121	0.386695	0.248941	0.29398	0.429057	0.0513316	0.230112	0.548864	0.542018	0.0666388	0.367834	0.875839	0.203022	0.0695611	0.572328	0.891534	0.12809	0.845298	0.679467	0.582149	0.0612316	0.178126	0.611569	0.731707
X199802	0.672142	0.932004	0.656627	0.328733	0.0147765	0.455111	0.35533	0.47707	0.377425	0.19635	0.025295	0.590679	0.731349	0.359354	0.992544	0.68974	0.168252	0.0942796	0.0908748	0.5654	0.143184	0.602243	0.899022	0.0233812	0.0362845	0.140369	0.122995	0.335171	0.216049	0.550629	0.610368	0.00142155	0.00656314	0.0855799	0.179455	0.0539876	0.683519	0.808562	0.200367	0.193832	0.0810219	0.568354	0.0371064	0.324234	0.539515	0.285108	0.788443	0.183733	0.0102801
X199786	0.566874	0.999451	0.588293	0.756901	0.45491	0.196146	0.413379	0.598163	0.168193	0.504111	0.00258532	0.925177	0.255754	0.161081	0.486676	0.992429	0.82275	0.30179	0.336144	0.99923	0.223542	0.0655291	0.684951	0.5413	0.942373	0.279294	0.943619	0.946456	0.97359	0.733565	0.150525	0.0560116	0.0119982	0.784901	0.224307	0.96076	0.844566	0.693104	0.370473	0.222656	0.170536	0.0697084	0.985077	0.487619	0.533009	0.145416	0.136108	0.776027	0.178754
X199777	0.759356	0.687044	0.509297	0.361375	0.210527	0.28365	0.358709	0.4415	0.155427	0.148899	1.14e-05	0.470087	0.436378	0.203993	0.0536636	0.268598	0.513573	0.0430276	0.130013	0.267969	0.00963422	0.288519	0.275132	0.510362	0.0972258	0.639913	0.0580207	0.14038	0.768181	0.3445	0.566682	0.644402	0.468246	0.393758	0.900747	0.403711	0.387183	0.671665	0.767235	0.824364	0.376833	0.743927	0.153759	0.185251	0.41422	0.0736967	0.0510147	0.36621	0.121849
X199596	0.358149	0.386767	0.466038	0.653717	0.741147	0.464562	0.183179	0.169564	0.102392	0.238469	0.00250366	0.475896	0.0183814	0.225619	0.654311	0.446982	0.670992	0.292871	0.529409	0.644832	0.522231	0.448774	0.78867	0.951329	0.992208	0.650671	0.286676	0.288056	0.392513	0.299492	0.0908425	0.437211	0.718934	0.796902	0.565121	0.611567	0.306448	0.543141	0.380274	0.0190489	0.653579	0.545288	0.328035	0.162579	0.267306	0.850898	0.262808	0.168945	0.0162866
X199562	0.34712	0.35686	0.313402	0.308791	0.249601	0.696852	0.25847	0.976358	0.423574	0.34252	0.0787425	0.643135	0.250611	0.474768	0.685493	0.0259847	0.149188	0.791427	0.926391	0.866963	0.668187	0.580337	0.337115	0.248988	0.97813	0.563065	0.864968	0.889799	0.826071	0.821176	0.786175	0.828792	0.316762	0.782711	0.34816	0.431758	0.72347	0.181831	0.192593	0.102984	0.36821	0.958602	0.942094	0.935254	0.237089	0.287123	0.823573	0.766707	0.150008
X199553	0.188821	0.351342	0.193284	0.126619	0.854422	0.856937	0.66119	0.185656	0.0575881	0.100254	0.351303	0.242988	0.62095	0.89287	0.910254	0.79558	0.272778	0.218791	0.851871	0.117748	0.469091	0.108921	0.464361	0.937303	0.0940705	0.472122	0.318211	0.973542	0.807569	0.034807	0.817821	0.618888	0.176577	0.444485	0.960811	0.457665	0.600783	0.0774338	0.291278	0.187185	0.375945	0.985102	0.370245	0.289935	0.588881	0.0355106	0.401798	0.185963	0.230731
X199463	0.862145	0.0153945	0.771296	0.438163	0.866036	0.422721	0.882048	0.15756	0.70198	0.682759	0.000277944	0.135376	0.944844	0.574806	0.96425	0.930803	0.325282	0.442377	0.693566	0.662954	0.647203	0.346219	0.0614066	0.187714	0.755504	0.398397	0.394124	0.124305	0.242571	0.0848504	0.829586	0.0907426	0.797566	0.743295	0.889589	0.621552	0.854837	0.180673	0.402432	0.31737	0.928787	0.420829	0.983211	0.940117	0.951075	0.554608	0.707657	0.239712	0.879245
X199337	0.00120435	0.0667139	0.742373	0.864325	0.501028	0.305161	0.748853	0.288754	0.604672	0.680028	0.00900393	0.722561	0.213994	0.37024	0.537199	0.346102	0.103353	0.39696	0.769427	0.634802	0.105534	0.208096	0.974239	0.155967	0.564849	0.279842	0.48848	0.372036	0.185852	0.157692	0.931058	0.188073	0.486055	0.418786	0.00933935	0.978985	0.202865	0.375512	0.271004	0.707881	0.0509139	0.0908294	0.716955	0.866679	0.852182	0.720294	0.072803	0.983972	0.415348
X199259	0.139608	0.66343	0.895314	0.160069	0.966112	0.020432	0.740591	0.708693	0.651241	0.3255	0.0126857	0.927698	0.864595	0.666903	0.898025	0.856864	0.24708	0.750384	0.453505	0.604564	0.912141	0.259019	0.604404	0.409287	0.769416	0.698922	0.177431	0.136239	0.977203	0.283333	0.230596	0.903926	0.38034	0.780073	0.634895	0.156597	0.11711	0.613624	0.786449	0.401493	0.897628	0.10984	0.255601	0.177151	0.613404	0.935471	0.210188	0.0280209	0.309191
X199250	0.499338	0.170092	0.203237	0.0733049	0.61974	0.0148179	0.0457003	0.572073	0.793685	0.392388	1.84e-07	0.5296	0.40991	0.300475	0.672172	0.189226	0.887773	0.157075	0.681972	0.936676	0.725779	0.19604	0.580931	0.80348	0.28049	0.286121	0.0526279	0.21532	0.508298	0.876685	0.120043	0.351824	0.0777766	0.754131	0.135812	0.164684	0.472357	0.983437	0.488996	0.119216	0.498949	0.734223	0.58573	0.698904	0.147333	0.381599	0.692706	0.206713	0.0398298
X199239	0.630196	0.370531	0.284386	0.94782	0.0176752	0.525348	0.38591	0.161198	0.859662	0.637499	0.0305847	0.932018	0.41417	0.625613	0.697107	0.270227	0.205516	0.715711	0.782389	0.435973	0.825985	0.542416	0.722508	0.544674	0.758614	0.407026	0.737077	0.979157	0.983748	0.102958	0.715913	0.689897	0.0932974	0.0787301	0.690939	0.263693	0.125704	0.571364	0.14399	0.000655753	0.0170816	0.758311	0.186183	0.0988744	0.445226	0.67363	0.492116	0.397987	0.148519
X199223	0.909396	0.89392	0.185389	0.749787	0.807895	0.497971	0.894906	0.804925	0.323029	0.914214	2.5e-08	0.179611	0.808655	0.741496	0.367664	0.689163	0.685832	0.65708	0.96178	0.723416	0.364761	0.761515	0.804138	0.584706	0.249976	0.82188	0.210675	0.546747	0.536242	0.66591	0.61134	0.805888	0.17835	0.208467	0.445934	0.42474	0.705433	0.0998774	0.982296	0.77764	0.791221	0.923554	0.973642	0.93768	0.00980224	0.585596	0.526651	0.233113	0.529478
X199215	0.447199	0.696943	0.305933	0.887604	0.22027	0.699563	0.00852189	0.79758	0.0826461	0.132804	2.94e-13	0.0449	0.758031	0.213855	0.341181	0.66261	0.0976728	0.130771	0.472	0.579741	0.188551	0.317403	0.697077	0.331508	0.74726	0.727416	0.882396	0.278748	0.130132	0.242828	0.117132	0.954169	0.446695	0.519599	0.00695605	0.32949	0.999058	0.219011	0.182646	0.667665	0.333631	0.0459886	0.489278	0.980373	0.0836998	0.157655	0.134092	0.411574	0.533196
X199205	0.160444	0.0851273	0.2352	0.597953	0.142341	0.367949	0.770097	0.399976	0.968754	0.97692	2.5e-08	0.381532	0.257572	0.444507	0.8436	0.398902	0.409051	0.507652	0.190374	0.332152	0.388778	0.862042	0.602342	0.0124976	0.139514	0.620422	0.594729	0.915953	0.932866	0.924547	0.553874	0.159623	0.664543	0.833234	0.835284	0.362161	0.619806	0.523152	0.132026	0.980417	0.518813	0.910882	0.349381	0.464093	0.161518	0.660231	0.893165	0.461146	0.719746
X199177	0.0227762	0.992709	0.357959	0.0642211	0.593536	0.698067	0.496231	0.0678924	0.284454	0.556263	6.97e-15	0.579197	0.139272	0.809959	0.650889	0.915347	0.325712	0.802693	0.566073	0.633099	0.0890909	0.386847	0.948841	0.0474137	0.709181	0.213443	0.0620504	0.22931	0.99286	0.240092	0.26148	0.222171	0.890475	0.113415	0.0494554	0.805204	0.601551	0.962873	0.106141	0.529901	0.32105	0.393364	0.652357	0.426292	0.277736	0.0790189	0.253157	0.894326	0.783424
X1.5.anhydroglucitol	0.784731	0.952327	0.651361	0.697596	0.470087	0.468706	0.972314	0.794551	0.405844	0.937282	0.375611	0.080899	0.220328	0.382228	0.96648	0.439662	0.956977	0.155504	0.382477	0.841063	0.0426253	0.950019	0.250675	0.498016	0.905767	0.0762812	0.711235	0.89338	0.297222	0.223314	0.45067	0.808295	0.516099	0.0559323	0.137773	0.707288	0.884214	0.254601	0.803992	0.490671	0.0517952	0.205415	0.648084	0.870799	0.955292	0.649767	0.179929	0.345151	0.548611
X1.3.diaminopropane	0.291104	0.326377	0.273077	0.32057	0.577936	0.237667	0.688106	0.100352	0.636234	0.686189	0.267322	0.617365	0.659082	0.362575	0.198579	0.391353	0.758995	0.419313	0.959184	0.715821	0.136925	0.00979385	0.0414068	0.676342	0.597338	0.645768	0.883792	0.359245	0.649551	0.892152	0.986942	0.150987	0.00040726	0.995819	0.473016	0.325289	0.314405	0.977654	0.899166	0.0213935	0.263027	0.576509	0.330739	0.404476	0.961569	0.966643	0.920515	0.426776	0.743029
X1.2.anhydro.myo.inositol.NIST	0.149	0.0778365	0.326787	0.248717	0.543059	0.0473465	0.559328	0.5482	0.697154	0.968404	1.7e-17	0.37449	0.405999	0.585805	0.415788	0.27206	0.39745	0.969855	0.805187	0.53132	0.379766	0.922401	0.321921	0.220233	0.227174	0.14036	0.234553	0.369487	0.734037	0.0931669	0.253366	0.325857	0.0848279	0.853276	0.239945	0.134878	0.0306279	0.615049	0.676254	0.790464	0.788193	0.100389	0.64575	0.205701	0.276626	0.0855371	0.169881	0.0795248	0.23405
Aliphatic glucosinolates
	AL.CV.II.4	AL.CV.III.38	AL.CV.IV.17	AL.CV.IV.26	AL.CV.IV.47	AL.CV.V.26	AL.CV.V.82	Maternal	AL.CV.II.4*AL.CV.III.38	AL.CV.II.4*AL.CV.IV.17	AL.CV.II.4*AL.CV.IV.26	AL.CV.II.4*AL.CV.IV.47	AL.CV.II.4*AL.CV.V.26	AL.CV.II.4*AL.CV.V.82	AL.CV.II.4*Maternal	AL.CV.III.38*AL.CV.IV.17	AL.CV.III.38*AL.CV.IV.26	AL.CV.III.38*AL.CV.IV.47	AL.CV.III.38*AL.CV.V.26	AL.CV.III.38*AL.CV.V.82	AL.CV.III.38*Maternal	AL.CV.IV.17*AL.CV.IV.26	AL.CV.IV.17*AL.CV.IV.47	AL.CV.IV.17*AL.CV.V.26	AL.CV.IV.17*AL.CV.V.82	AL.CV.IV.17*Maternal	AL.CV.IV.26*AL.CV.IV.47	AL.CV.IV.26*AL.CV.V.26	AL.CV.IV.26*AL.CV.V.82	AL.CV.IV.26*Maternal	AL.CV.IV.47*AL.CV.V.26	AL.CV.IV.47*AL.CV.V.82	AL.CV.IV.47*Maternal	AL.CV.V.26*AL.CV.V.82	AL.CV.V.26*Maternal	AL.CV.V.82*Maternal
	X2_311554	MSAT3.6	C4_1416972	C4_2727033	C4_7559598	ICE5	C5_22259506	Maternal	X2_311554:MSAT3.6	X2_311554:C4_1416972	X2_311554:C4_2727033	X2_311554:C4_7559598	X2_311554:ICE5	X2_311554:C5_22259506	X2_311554:Maternal	MSAT3.6:C4_1416972	MSAT3.6:C4_2727033	MSAT3.6:C4_7559598	MSAT3.6:ICE5	MSAT3.6:C5_22259506	MSAT3.6:Maternal	C4_1416972:C4_2727033	C4_1416972:C4_7559598	C4_1416972:ICE5	C4_1416972:C5_22259506	C4_1416972:Maternal	C4_2727033:C4_7559598	C4_2727033:ICE5	C4_2727033:C5_22259506	C4_2727033:Maternal	C4_7559598:ICE5	C4_7559598:C5_22259506	C4_7559598:Maternal	ICE5:C5_22259506	ICE5:Maternal	C5_22259506:Maternal
OH3	0.294296	0.931564	6.54e-06	0.419846	0.947512	0.544032	0.999734	0.328667	0.530287	0.310044	0.184078	0.454595	0.68071	0.265635	0.392724	0.41151	0.505418	0.0638481	0.469761	0.191589	0.643641	0.788083	0.216097	0.89733	0.431652	0.767455	0.334153	0.985299	0.584395	0.508194	0.927524	0.49363	0.0835019	0.333027	0.105172	0.0250752
MSO3	0.00289731	0.401926	0.0588867	0.5232	0.313385	0.880487	0.285368	0.122044	0.140478	0.202869	0.0115801	0.891665	0.840818	0.300483	0.481736	0.973577	0.535972	0.363805	0.633062	0.585217	0.827572	0.00419596	0.172706	0.06698	0.0953981	0.427557	0.0432776	0.591226	0.132635	0.900841	0.380775	0.120493	0.148322	0.708548	0.247338	0.057195
OH4	0.00918124	0.67108	0.132597	0.00181163	9.83e-05	0.269082	0.631252	0.17577	0.854468	0.0664335	0.50658	0.885172	0.203224	0.884872	0.45447	0.771997	0.610222	0.576551	0.11391	0.759623	0.958239	0.173817	0.10207	0.253249	0.961247	0.248228	0.819339	0.326679	0.779847	0.492843	0.353002	0.826062	0.985776	0.775345	0.747329	0.767504
Allyl	0.919579	0.0969493	1.36e-10	0.863564	0.054098	0.234936	0.958213	0.36416	0.287989	0.277958	0.465674	0.497913	0.787251	0.812497	0.614659	0.401404	0.929114	0.146212	0.942178	0.610201	0.916604	0.111389	0.936661	0.646218	0.963969	0.0755838	0.914402	0.548204	0.566806	0.255983	0.446453	0.00327292	0.528029	0.0423294	0.747958	0.100609
Butenyl	0.434591	0.417937	4.54e-05	0.73066	0.122822	0.0712235	0.256074	0.745268	0.375753	0.184132	0.436155	0.293926	0.569215	0.963244	0.46257	0.526834	0.991115	0.306509	0.5574	0.588677	0.748386	0.405154	0.90824	0.351641	0.022757	0.0421007	0.799333	0.831064	0.103891	0.0931929	0.586041	0.247095	0.995681	0.220359	0.810343	0.140511
MT3	0.00557926	0.00397844	0.445358	0.18864	0.263851	0.693659	0.866551	0.107367	0.0109761	0.974637	0.298669	0.604169	0.465736	0.383457	0.247313	0.861808	0.520795	0.495985	0.750817	0.509864	0.637642	0.918381	0.241436	0.818915	0.891675	0.2986	0.156984	0.286715	0.924029	0.751809	0.165655	0.960576	0.0259942	0.552703	0.910403	0.485364
MSOH	0.0433258	0.212685	0.573887	0.737566	0.0810194	0.012033	0.424217	0.848835	0.773128	0.684864	0.586397	0.806554	0.031125	0.839714	0.221889	0.74073	0.539436	0.948724	0.613403	0.459549	0.735335	0.476451	0.351154	0.91507	0.647202	0.141746	0.133651	0.515126	0.396548	0.402303	0.350848	0.443452	0.141649	0.458142	0.933817	0.0730681
MSOO	0.230883	0.911559	0.553825	0.609937	0.16641	0.023862	0.115817	0.834755	0.235784	0.0474195	0.0564996	0.99352	0.258194	0.618077	0.121856	0.147417	0.342316	0.154073	0.605339	0.684694	0.951657	0.80133	0.519361	0.938703	0.594013	0.228808	0.191624	0.895325	0.114657	0.110883	0.531604	0.0680105	0.133366	0.0320155	0.0422817	0.927137
MT8	0.344057	0.764456	0.583967	0.970608	0.0126297	0.0051179	0.032327	0.00187401	0.310281	0.0629525	0.510501	0.140572	0.313912	0.0176209	0.66963	0.900845	0.437624	0.339545	0.484604	0.637603	0.585136	0.17154	0.61391	0.96833	0.143243	0.199582	0.86951	0.883055	0.241338	0.062748	0.635677	0.456439	0.29053	0.0589263	0.733689	0.896974
SC	0.164013	0.00159458	0.507374	0.50721	0.645523	0.0833086	0.284202	0.64007	0.174275	0.378732	0.75126	0.904867	0.372378	0.158141	0.604717	0.150458	0.209036	0.069853	0.538106	0.405131	0.768957	0.940671	0.987046	0.498713	0.726311	0.300202	0.807483	0.398816	0.85669	0.104939	0.86011	0.194998	0.265851	0.915294	0.549419	0.286558
LC	0.709945	0.306813	0.675589	0.702242	0.607755	0.138018	0.617557	0.721711	0.890007	0.672264	0.448985	0.46473	0.865026	0.677402	0.0776102	0.185174	0.174591	0.269835	0.0954164	0.30691	0.904095	0.708728	0.899301	0.832255	0.920093	0.272497	0.665373	0.993213	0.760041	0.215075	0.602256	0.265007	0.470931	0.271724	0.635803	0.197846
TotAli	0.370561	0.00257602	0.476463	0.578571	0.713282	0.111159	0.347554	0.728266	0.533442	0.507042	0.893588	0.760195	0.436319	0.166266	0.354852	0.461322	0.598336	0.0525385	0.504623	0.548968	0.968755	0.866223	0.901051	0.673602	0.641982	0.598314	0.886779	0.558056	0.782474	0.320521	0.945094	0.156115	0.381629	0.936867	0.692123	0.163676
SCpTAli	0.0395617	0.426032	0.698648	0.498558	0.895773	0.231689	0.415733	0.593529	0.0217871	0.603526	0.676106	0.607449	0.582193	0.714542	0.821627	0.0289442	0.0607373	0.399558	0.849441	0.0641718	0.398345	0.36325	0.902487	0.716752	0.0176119	0.971511	0.645992	0.88129	0.027029	0.626427	0.275569	0.554993	0.8669	0.711897	0.652748	0.153745
MTOpMTMSOO	0.878358	0.114363	0.780458	0.613412	0.394624	0.00782347	0.000173798	0.000117291	0.504385	0.628366	0.356816	0.978477	0.223091	0.1281	0.599367	0.241769	0.0270698	0.0383152	0.719976	0.764438	0.880597	0.0665062	0.655538	0.436525	0.254625	0.700226	0.69204	0.868513	0.0567623	0.88101	0.847985	0.731376	0.65252	0.544903	0.694209	0.677474
Indole_Glucosinolates
	IN.CV.III.10	IN.CV.IV.17	IN.CV.IV.68	IN.CV.IV.87	Maternal	IN.CV.III.10*IN.CV.IV.17	IN.CV.III.10*IN.CV.IV.68	IN.CV.III.10*IN.CV.IV.87	IN.CV.III.10*Maternal	IN.CV.IV.17*IN.CV.IV.68	IN.CV.IV.17*IN.CV.IV.87	IN.CV.IV.17*Maternal	IN.CV.IV.68*IN.CV.IV.87	IN.CV.IV.68*Maternal	IN.CV.IV.87*Maternal
	X3.2231413	C4_1416972	C4_11731431	X4.17608717	Maternal	X3.2231413:C4_1416972	X3.2231413:C4_11731431	X3.2231413:X4.17608717	X3.2231413:Maternal	C4_1416972:C4_11731431	C4_1416972:X4.17608717	C4_1416972:Maternal	C4_11731431:X4.17608717	C4_11731431:Maternal	X4.17608717:Maternal
Indole	0.678404	0.16467	0.77015	0.566857	0.0519664	0.512371	0.280665	0.540148	0.714424	0.343842	0.0684871	0.381884	0.344801	0.46242	0.619392
MO4pInd	0.00060917	0.108501	0.574949	0.883353	0.00957373	0.24225	0.249707	0.208971	0.145413	0.602717	0.0420951	0.654676	0.247221	0.667497	0.292377
I3M	0.00176935	0.372399	0.00180488	0.293861	0.00396621	0.478403	0.2635	0.504594	0.940979	0.342752	0.432689	0.851438	0.254638	0.968774	0.0901533
MOI3M4	0.506599	0.00103442	0.445422	0.992045	0.685464	0.620678	0.31465	0.0235229	0.010583	0.156638	0.0514984	0.965076	0.278577	0.794572	0.780786
NMOI3M	0.83704	0.895936	0.17417	3.21e-06	0.148833	0.0306152	0.462209	0.890914	0.521	0.153968	0.779341	0.155143	0.305214	0.664845	0.704264
Growth
	GR.CV.1.19	GR.CV.III.2	Maternal	GR.CV.1.19*GR.III.2	GR.CV.1.19*Maternal	GR.CV.III.2*Maternal
	C1_5693045	C3_434943	Maternal	C1_5693045:C3_434943	C1_5693045:Maternal	C3_434943:Maternal
Day09	0.0358069	0.610439	0.503281	0.50194	0.223931	0.0755683
Day11	0.888624	0.20443	0.389934	0.282776	0.151913	0.0186837
Day15	0.108755	0.116724	0.108925	0.0792068	0.185258	0.0124339
Day19	0.161731	0.283389	0.172512	0.30899	0.392077	0.00224111
Day23	0.183485	0.0743517	0.114647	0.291853	0.785368	0.00358766
[truncated: 17 more columns]
